# Supplementary material for: Development Of A Three-Gene Prognostic Signature For Hepatitis B Virus Associated Hepatocellular Carcinoma Based On Integrated Transcriptomic Analysis
Source: PubMed Central journal article supplement — J Cancer. 2018 Apr 30;9(11):1989–2002. doi: 10.7150/jca.23762 (PMC5995946; doi:10.7150/jca.23762), 2018-04-30
Supplement: jcav09p1989s1.pdf [file jcav09p1989s1.pdf]

Table S1. Signature genes

| Name      | Pvalue      | logFC      |
|-----------|-------------|------------|
| AKR1B10   | 1.20E-05    | 4.81652036 |
| MELK      | 0.000107427 | 2.17585373 |
| ALDH3A1   | 0.00012336  | 1.33689212 |
| MRAP2     | 0.000315078 | 1.48284567 |
| PBK       | 0.000315078 | 2.16406466 |
| GPC3      | 0.000369633 | 6.3568736  |
| ISX       | 0.000408408 | 1.82938645 |
| SLC7A11   | 0.000449106 | 1.82403631 |
| TOP2A     | 0.000491725 | 2.69006218 |
| FAM133A   | 0.000536263 | 1.11430925 |
| KRT23     | 0.000606666 | 1.46834723 |
| PEG10     | 0.000655997 | 2.77983435 |
| GINS1     | 0.000760399 | 2.11815671 |
| RACGAP1   | 0.000843718 | 2.3551255  |
| PRC1      | 0.000872446 | 2.6182372  |
| PITX1     | 0.00098477  | 1.17234783 |
| HMMR      | 0.000992125 | 2.09374041 |
| DLGAP5    | 0.000992125 | 1.77579121 |
| NUF2      | 0.001023236 | 1.61330397 |
| ANLN      | 0.001086886 | 1.94727453 |
| NDC80     | 0.001152438 | 1.87978076 |
| TTK       | 0.001219892 | 1.92741771 |
| DTL       | 0.001289245 | 2.40790098 |
| SULT1C2   | 0.001324634 | 2.29633446 |
| ASPM      | 0.001360497 | 2.44801708 |
| NQO1      | 0.00147093  | 3.09619283 |
| COL15A1   | 0.001508689 | 2.23287033 |
| RAP2A     | 0.001664455 | 1.18776818 |
| HOXA10    | 0.00181809  | 1.05070495 |
| SPINK1    | 0.002113222 | 4.87529958 |
| LOC344887 | 0.002131769 | 1.08462864 |
| SFN       | 0.002177079 | 2.22783069 |
| KIF20A    | 0.002177079 | 2.19948109 |
| AP1M2     | 0.002221492 | 1.28655243 |
| PAGE4     | 0.002262118 | 1.46433101 |
| KIF14     | 0.002315831 | 1.66585498 |
| TSPAN8    | 0.002383232 | 1.14930774 |
| UCHL1     | 0.002560728 | 1.72606951 |
| FOXM1     | 0.00265602  | 1.99690727 |
| ZWINT     | 0.00265602  | 2.40995412 |
| GJA1      | 0.002917393 | 1.05477031 |
| PRAME     | 0.002990753 | 1.13908221 |
| BUB1B     | 0.003019166 | 2.02801192 |
| PTTG1     | 0.003019166 | 2.74248254 |

|          |             |            |
|----------|-------------|------------|
| SPP1     | 0.00318181  | 2.67840262 |
| CAP2     | 0.003577637 | 2.05963377 |
| MLLT11   | 0.003625596 | 1.15858006 |
| TM4SF20  | 0.003777978 | 1.14612076 |
| KIF4A    | 0.003874333 | 1.78142005 |
| E2F8     | 0.003935066 | 1.44548528 |
| CCNB2    | 0.004225957 | 2.28598014 |
| SERPINE2 | 0.004475109 | 1.00851652 |
| CENPF    | 0.004633722 | 1.54111944 |
| REG3A    | 0.004803503 | 2.40145991 |
| PRKAA2   | 0.004969792 | 1.06899394 |
| LPL      | 0.00524695  | 1.3250612  |
| CTHRC1   | 0.005897471 | 1.64312002 |
| FGF13    | 0.006079314 | 1.46513016 |
| RRM2     | 0.006198527 | 2.5339969  |
| DKK1     | 0.006338202 | 1.97545053 |
| HJURP    | 0.006338202 | 1.64384509 |
| CCL20    | 0.006351804 | 2.67356803 |
| NUSAP1   | 0.006429129 | 2.29152171 |
| ACSL4    | 0.006506911 | 3.06088509 |
| THBS4    | 0.006585151 | 1.65633629 |
| CD109    | 0.006902678 | 1.33084641 |
| GNG4     | 0.007346219 | 1.25876463 |
| KIF15    | 0.007392655 | 1.25583455 |
| E2F1     | 0.007583622 | 1.25636    |
| MAP2     | 0.007716956 | 1.0647586  |
| CEP55    | 0.007728413 | 1.45302355 |
| CDK1     | 0.007899019 | 1.88402068 |
| RAD51AP1 | 0.008158334 | 1.48156331 |
| SMPX     | 0.00825941  | 1.09369066 |
| LYPD1    | 0.008421731 | 1.26478403 |
| SCGN     | 0.008505541 | 1.2409677  |
| CCNA2    | 0.008689205 | 1.65570049 |
| MAGEA12  | 0.008998818 | 1.62465754 |
| ROBO1    | 0.00905217  | 2.75567607 |
| CDKN3    | 0.009516038 | 2.30917058 |
| UBE2C    | 0.00979977  | 2.28266676 |
| FAM83D   | 0.009991176 | 1.49422177 |
| ACACB    | 4.16E-05    | -1.1127065 |
| CLEC1B   | 4.93E-21    | -4.5512457 |
| VIPR1    | 5.99E-20    | -2.8625484 |
| FCN2     | 7.66E-19    | -3.8746362 |
| FCN3     | 9.51E-18    | -4.8676078 |
| CRHBP    | 1.49E-17    | -3.9378051 |
| ECM1     | 3.39E-17    | -2.8418381 |
| CLEC4M   | 8.77E-17    | -3.1102605 |

|          |          |            |
|----------|----------|------------|
| CXCL14   | 1.41E-16 | -3.5496167 |
| DNASE1L3 | 3.70E-16 | -3.5546821 |
| MARCO    | 1.18E-15 | -3.3659149 |
| LCAT     | 2.07E-15 | -2.1325359 |
| GSTZ1    | 2.12E-15 | -2.7374617 |
| CLEC4G   | 2.75E-15 | -2.9759173 |
| APOF     | 3.50E-15 | -3.8508131 |
| TTC36    | 1.99E-14 | -2.7092199 |
| MT1F     | 4.29E-14 | -4.6962524 |
| NAT2     | 5.98E-14 | -3.5913023 |
| ACSM3    | 7.04E-14 | -2.3281112 |
| CFP      | 8.46E-14 | -2.0426384 |
| DBH      | 1.18E-13 | -1.8198491 |
| MT1X     | 1.21E-13 | -4.5719731 |
| STAB2    | 2.26E-13 | -2.1042714 |
| HAMP     | 3.02E-13 | -6.3463563 |
| LPA      | 4.43E-13 | -2.7844426 |
| OIT3     | 5.02E-13 | -2.7269987 |
| RDH16    | 5.05E-13 | -3.5539957 |
| ETFDH    | 1.26E-12 | -1.9381399 |
| SLC22A1  | 1.53E-12 | -5.3300538 |
| GYS2     | 1.75E-12 | -3.3371203 |
| MT1M     | 1.82E-12 | -3.8516904 |
| SLCO1B3  | 1.93E-12 | -4.2717361 |
| GCH1     | 2.22E-12 | -2.1705258 |
| CYP4A11  | 2.80E-12 | -3.7953607 |
| PBLD     | 2.97E-12 | -2.1123802 |
| IGFALS   | 3.10E-12 | -2.6701795 |
| CYP1A2   | 3.16E-12 | -5.1317239 |
| CETP     | 4.60E-12 | -2.1283161 |
| CPEB3    | 4.66E-12 | -1.5952725 |
| KLKB1    | 5.19E-12 | -2.9494089 |
| C9       | 5.64E-12 | -4.5767069 |
| F9       | 8.09E-12 | -3.4433096 |
| F11      | 8.64E-12 | -2.6112713 |
| PTH1R    | 8.81E-12 | -1.9053592 |
| C1RL     | 1.00E-11 | -1.9433075 |
| KBTBD11  | 1.05E-11 | -2.0947582 |
| NTF3     | 1.17E-11 | -1.2945429 |
| ASPA     | 2.26E-11 | -2.1243444 |
| EHD3     | 2.44E-11 | -1.278375  |
| HAO2     | 2.44E-11 | -4.0328931 |
| CYP2C8   | 2.59E-11 | -3.3369435 |
| ALDH8A1  | 2.66E-11 | -2.6549763 |
| CNDP1    | 2.68E-11 | -3.5870817 |
| ADRA1A   | 2.76E-11 | -1.8622282 |

|         |          |            |
|---------|----------|------------|
| ACADS   | 3.07E-11 | -1.2743707 |
| COLEC10 | 3.25E-11 | -1.8781191 |
| FTCD    | 4.52E-11 | -2.330476  |
| C8A     | 5.61E-11 | -3.2664216 |
| STARD5  | 6.49E-11 | -1.5209863 |
| EGR1    | 7.75E-11 | -3.5496919 |
| CYP3A4  | 7.85E-11 | -3.287012  |
| GHR     | 7.87E-11 | -2.7703362 |
| MT1E    | 8.18E-11 | -2.5151351 |
| NGFR    | 1.02E-10 | -1.4150838 |
| MT1G    | 1.08E-10 | -4.3373611 |
| ESR1    | 1.11E-10 | -1.3542346 |
| ASS1    | 1.21E-10 | -3.0357742 |
| HGFAC   | 1.29E-10 | -2.7881931 |
| CYP2C9  | 1.63E-10 | -2.4634006 |
| SLC27A5 | 1.97E-10 | -2.6494902 |
| SORL1   | 2.05E-10 | -1.8149001 |
| ACADSB  | 2.26E-10 | -1.8341283 |
| GPD1    | 2.36E-10 | -1.8175309 |
| STEAP3  | 2.39E-10 | -1.8284821 |
| DCN     | 2.45E-10 | -3.7027701 |
| ADH6    | 2.51E-10 | -2.2098024 |
| GCDH    | 2.73E-10 | -1.6883381 |
| MTHFD1  | 2.78E-10 | -1.9133417 |
| MT2A    | 3.51E-10 | -2.0810649 |
| BCKDHB  | 3.96E-10 | -1.3035277 |
| TBXA2R  | 4.52E-10 | -1.2073918 |
| PDE2A   | 5.08E-10 | -1.2503198 |
| PROZ    | 5.42E-10 | -2.2132835 |
| SRPX    | 5.53E-10 | -2.4066541 |
| SLC4A4  | 5.72E-10 | -1.4811441 |
| GLYAT   | 6.09E-10 | -2.9584388 |
| PLAC8   | 6.31E-10 | -2.3418135 |
| HAAO    | 6.49E-10 | -1.6128724 |
| KMO     | 6.62E-10 | -2.4951541 |
| ID1     | 6.97E-10 | -2.7191735 |
| GCKR    | 7.46E-10 | -1.7029752 |
| CYP2B6  | 7.91E-10 | -2.1776971 |
| ANGPTL6 | 9.55E-10 | -1.4640669 |
| NDRG2   | 1.03E-09 | -1.6878446 |
| SKAP1   | 1.06E-09 | -1.6904152 |
| SLC10A1 | 1.09E-09 | -3.2413654 |
| ANXA10  | 1.16E-09 | -2.6943748 |
| GBA3    | 1.20E-09 | -3.1293891 |
| CXCL12  | 1.24E-09 | -3.1877838 |
| C1R     | 1.31E-09 | -2.2637313 |

|          |          |            |
|----------|----------|------------|
| SLC35D1  | 1.36E-09 | -1.1020779 |
| GRAMD1C  | 1.48E-09 | -1.9277351 |
| RCL1     | 1.55E-09 | -1.7989869 |
| MAT1A    | 1.60E-09 | -2.2497902 |
| IVD      | 1.68E-09 | -1.2532095 |
| DCXR     | 1.83E-09 | -2.1907139 |
| DEPDC7   | 1.97E-09 | -1.486951  |
| FBP1     | 2.03E-09 | -3.7486365 |
| CD5L     | 2.06E-09 | -2.8457106 |
| ACSL1    | 2.09E-09 | -2.1073727 |
| HMGCL    | 2.34E-09 | -1.119586  |
| TDO2     | 2.46E-09 | -2.881971  |
| GNAO1    | 2.58E-09 | -1.2600446 |
| HGF      | 2.85E-09 | -1.1419021 |
| C8orf4   | 2.93E-09 | -2.3437948 |
| FYN      | 3.08E-09 | -1.1896135 |
| GNMT     | 3.62E-09 | -3.4189183 |
| PLSCR4   | 3.64E-09 | -1.6395623 |
| MPPED1   | 3.68E-09 | -1.2180081 |
| CXCL2    | 4.13E-09 | -2.8670264 |
| C6       | 4.18E-09 | -3.193273  |
| ZGPAT    | 4.18E-09 | -1.8658265 |
| CBR4     | 4.33E-09 | -1.349716  |
| ST3GAL6  | 4.41E-09 | -1.6856118 |
| AZGP1    | 4.51E-09 | -2.6016253 |
| NPY1R    | 4.52E-09 | -1.9719778 |
| SIGIRR   | 5.05E-09 | -1.6040459 |
| SRD5A2   | 5.17E-09 | -2.1830969 |
| GPM6A    | 5.86E-09 | -1.5359787 |
| EPHX2    | 6.51E-09 | -2.2330617 |
| SLC39A14 | 6.53E-09 | -1.5077865 |
| FOS      | 7.49E-09 | -3.5825315 |
| MT1H     | 7.54E-09 | -2.7599557 |
| NR1I2    | 7.62E-09 | -1.7164043 |
| BCO2     | 7.76E-09 | -2.0728427 |
| RCAN1    | 8.58E-09 | -1.9276328 |
| PRODH2   | 9.46E-09 | -1.2985866 |
| LYVE1    | 1.09E-08 | -2.3616957 |
| FAM134B  | 1.10E-08 | -1.9292617 |
| GNE      | 1.13E-08 | -1.6960454 |
| BMP5     | 1.30E-08 | -1.0156141 |
| AKR7A3   | 1.32E-08 | -2.018007  |
| ABCA8    | 1.34E-08 | -1.9894174 |
| CDC37L1  | 1.41E-08 | -1.6514134 |
| ACAA1    | 1.63E-08 | -1.9631123 |
| NAT1     | 1.75E-08 | -1.3063045 |

|          |          |            |
|----------|----------|------------|
| MBL2     | 1.88E-08 | -3.2950142 |
| MASP1    | 1.96E-08 | -1.1974506 |
| ALDH2    | 2.09E-08 | -1.2744569 |
| CCBE1    | 2.15E-08 | -1.2718249 |
| EHHADH   | 2.56E-08 | -1.6061288 |
| MYOM2    | 2.65E-08 | -1.4382596 |
| MS4A6A   | 2.75E-08 | -1.5283079 |
| CD14     | 2.80E-08 | -2.5966194 |
| RHOB     | 2.80E-08 | -1.5984537 |
| CBFA2T3  | 2.90E-08 | -1.0370873 |
| IL1RAP   | 2.99E-08 | -1.6950139 |
| C1QTNF1  | 3.03E-08 | -1.1353933 |
| PCK1     | 3.21E-08 | -3.2054814 |
| ABAT     | 3.36E-08 | -1.7374948 |
| CYP2E1   | 3.44E-08 | -4.5407316 |
| EPB41L4B | 3.45E-08 | -1.1524938 |
| SERPINF2 | 3.67E-08 | -1.4969746 |
| F8       | 3.84E-08 | -1.2867453 |
| IGF1     | 3.90E-08 | -2.3507508 |
| GRHPR    | 4.01E-08 | -1.8113787 |
| ECM2     | 4.14E-08 | -1.3686747 |
| RGN      | 4.24E-08 | -1.7874237 |
| CAT      | 4.31E-08 | -1.5849977 |
| OGDHL    | 4.32E-08 | -1.9625111 |
| AADAT    | 4.93E-08 | -1.7576975 |
| TMEM27   | 4.93E-08 | -1.9688861 |
| ACADL    | 4.94E-08 | -1.9229193 |
| MFSD2A   | 5.15E-08 | -2.1976482 |
| SPP2     | 5.33E-08 | -3.3261448 |
| PGM1     | 5.43E-08 | -1.2158072 |
| MASP2    | 5.51E-08 | -1.6768941 |
| C7       | 5.60E-08 | -3.0091114 |
| CD81     | 5.65E-08 | -1.7063184 |
| CYP2J2   | 5.65E-08 | -1.6558509 |
| KCNN2    | 5.75E-08 | -2.686765  |
| GPT      | 5.82E-08 | -1.2745784 |
| LIFR     | 6.00E-08 | -1.6890516 |
| ADH1B    | 6.21E-08 | -2.5908598 |
| BHMT     | 6.33E-08 | -2.7567339 |
| EDNRB    | 6.38E-08 | -1.4649455 |
| LHX2     | 6.40E-08 | -1.2054954 |
| ZFP36    | 6.49E-08 | -2.0156627 |
| AKR1D1   | 7.11E-08 | -2.6665149 |
| SLC17A2  | 7.23E-08 | -1.7027201 |
| XDH      | 7.82E-08 | -1.7994657 |
| FXYP1    | 7.87E-08 | -2.2037549 |

|           |          |            |
|-----------|----------|------------|
| SERPING1  | 8.02E-08 | -1.7668557 |
| DMD       | 9.45E-08 | -1.0779863 |
| ALDH6A1   | 9.90E-08 | -1.5252914 |
| IGFBP4    | 1.00E-07 | -1.31535   |
| PPAP2B    | 1.02E-07 | -1.2178804 |
| PEMT      | 1.09E-07 | -1.6494415 |
| AGL       | 1.15E-07 | -1.2373592 |
| PZP       | 1.19E-07 | -2.3975001 |
| MAN1C1    | 1.20E-07 | -1.7361114 |
| ADH1A     | 1.21E-07 | -2.8695854 |
| ACSM5     | 1.25E-07 | -2.2152508 |
| AFM       | 1.34E-07 | -3.3454946 |
| CYP39A1   | 1.36E-07 | -2.2363366 |
| SOCS2     | 1.40E-07 | -1.9821345 |
| C8B       | 1.42E-07 | -2.5549706 |
| LILRB5    | 1.44E-07 | -1.1444426 |
| CSAD      | 1.50E-07 | -1.449243  |
| TAT       | 1.52E-07 | -3.120481  |
| ADK       | 1.59E-07 | -1.2329269 |
| PON1      | 1.60E-07 | -2.041208  |
| CYP2C19   | 1.68E-07 | -2.3233504 |
| CHST4     | 1.73E-07 | -1.3963063 |
| ADAMTS13  | 1.76E-07 | -1.3619455 |
| TIMD4     | 1.78E-07 | -1.3112105 |
| GLS2      | 1.79E-07 | -2.9407494 |
| FAM65C    | 1.83E-07 | -1.3621195 |
| AR        | 1.95E-07 | -1.7241458 |
| SERPINA10 | 2.18E-07 | -1.7388207 |
| ANK3      | 2.21E-07 | -1.0104334 |
| SLC16A2   | 2.22E-07 | -1.404325  |
| ACADM     | 2.39E-07 | -1.1096075 |
| DMGDH     | 2.43E-07 | -1.6200659 |
| AOX1      | 2.45E-07 | -2.3324666 |
| CYP4F3    | 2.51E-07 | -1.2980841 |
| GADD45G   | 2.52E-07 | -1.5457619 |
| CIDEB     | 2.60E-07 | -1.4918566 |
| SULT2A1   | 2.60E-07 | -1.8370149 |
| CYP4F2    | 2.66E-07 | -2.1024806 |
| SRD5A1    | 3.00E-07 | -1.4809544 |
| GPHN      | 3.02E-07 | -1.080587  |
| GADD45B   | 3.06E-07 | -1.6279738 |
| SLC6A12   | 3.09E-07 | -1.6481543 |
| DHRS1     | 3.19E-07 | -1.6580649 |
| APOA5     | 3.44E-07 | -2.5645286 |
| JUNB      | 3.49E-07 | -1.2601859 |
| PROC      | 3.49E-07 | -1.139252  |

|           |          |            |
|-----------|----------|------------|
| ACSL5     | 3.53E-07 | -1.7993098 |
| CYP2A7    | 3.56E-07 | -2.2388899 |
| CD4       | 3.72E-07 | -1.1481491 |
| FAM13A    | 3.81E-07 | -1.5853135 |
| CYP4F12   | 3.84E-07 | -1.2216784 |
| GPR182    | 3.96E-07 | -1.4252061 |
| RND3      | 4.22E-07 | -2.3616756 |
| ART4      | 4.37E-07 | -1.2381551 |
| DPT       | 4.62E-07 | -2.0516098 |
| PFKFB1    | 4.71E-07 | -1.358037  |
| GABARAPL1 | 5.04E-07 | -1.5485624 |
| PCK2      | 6.23E-07 | -1.6178088 |
| PAIP2B    | 6.26E-07 | -1.2965425 |
| KCND3     | 6.31E-07 | -1.25193   |
| ASPG      | 6.41E-07 | -1.3057251 |
| TPPP2     | 6.56E-07 | -1.5294052 |
| SLC25A47  | 6.86E-07 | -2.2533929 |
| PAMR1     | 6.97E-07 | -1.2541654 |
| ANGPTL1   | 7.11E-07 | -1.0206683 |
| DIRAS3    | 7.44E-07 | -1.5122121 |
| PLG       | 7.48E-07 | -2.169892  |
| SLC16A4   | 7.50E-07 | -1.3080871 |
| MSRA      | 7.71E-07 | -1.1569271 |
| SARDH     | 7.88E-07 | -1.0617295 |
| DUSP1     | 8.22E-07 | -1.7762406 |
| CYP2A13   | 8.84E-07 | -1.6598643 |
| LPAL2     | 9.02E-07 | -1.017573  |
| PPL       | 9.17E-07 | -1.0727072 |
| SCP2      | 9.33E-07 | -1.1448559 |
| TEK       | 9.79E-07 | -1.0270728 |
| MUT       | 1.02E-06 | -1.1768603 |
| CFI       | 1.05E-06 | -1.6708026 |
| DNAJC12   | 1.07E-06 | -1.9077822 |
| SERPINA4  | 1.07E-06 | -1.6328837 |
| BMPER     | 1.07E-06 | -1.1750819 |
| HRSP12    | 1.09E-06 | -2.0883137 |
| AQP3      | 1.13E-06 | -1.3083148 |
| SATB1     | 1.13E-06 | -1.1286896 |
| LDHD      | 1.16E-06 | -1.1261787 |
| BDH2      | 1.16E-06 | -1.3297575 |
| HHIP      | 1.26E-06 | -1.3889573 |
| NAAA      | 1.32E-06 | -1.0199392 |
| CYP2A6    | 1.34E-06 | -2.5876751 |
| RNF125    | 1.39E-06 | -1.4651626 |
| SLC28A1   | 1.48E-06 | -1.5051442 |



|         |          |            |
|---------|----------|------------|
| CD1D    | 1.55E-06 | -1.3278868 |
| RBMS3   | 1.73E-06 | -1.0368112 |
| FCGR2B  | 1.78E-06 | -1.5116862 |
| AXL     | 1.87E-06 | -1.0035269 |
| ADH4    | 1.93E-06 | -2.3620852 |
| PXMP2   | 1.96E-06 | -1.4116987 |
| ALDOB   | 1.97E-06 | -2.4929363 |
| IDO2    | 2.00E-06 | -2.083019  |
| LECT2   | 2.01E-06 | -3.1272799 |
| PROS1   | 2.18E-06 | -1.3452258 |
| HPX     | 2.25E-06 | -2.4296398 |
| TIAM1   | 2.30E-06 | -1.0892579 |
| TGFBR3  | 2.36E-06 | -1.0452917 |
| OLFML3  | 2.36E-06 | -1.6479978 |
| PHYHD1  | 2.42E-06 | -1.059328  |
| IGFBP3  | 2.45E-06 | -1.4163389 |
| CP      | 2.60E-06 | -1.7248123 |
| HSD11B1 | 2.60E-06 | -3.112447  |
| SLC6A13 | 2.62E-06 | -1.4312822 |
| RDH5    | 2.65E-06 | -1.1596392 |
| KLHL2   | 2.69E-06 | -1.1162846 |
| ECHDC2  | 2.97E-06 | -1.718431  |
| BBOX1   | 3.06E-06 | -2.456457  |
| KCNK5   | 3.08E-06 | -1.0548866 |
| CLRN3   | 3.12E-06 | -2.0462028 |
| N4BP2L1 | 3.13E-06 | -1.1323547 |
| UROC1   | 3.19E-06 | -1.3391814 |
| ALAS1   | 3.21E-06 | -1.3752293 |
| NNMT    | 3.27E-06 | -3.5136746 |
| MOGAT2  | 3.27E-06 | -1.5941718 |
| FOLH1B  | 3.29E-06 | -1.4800711 |
| CTH     | 3.44E-06 | -2.2553799 |
| MRO     | 3.54E-06 | -1.0618411 |
| IL13RA2 | 3.60E-06 | -1.6916207 |
| FGA     | 3.88E-06 | -1.5522685 |
| CYP26A1 | 3.89E-06 | -2.8631295 |
| ADRB2   | 3.89E-06 | -1.1276546 |
| PON3    | 4.08E-06 | -1.5524345 |
| COLEC11 | 4.27E-06 | -2.0903251 |
| ITIH4   | 4.43E-06 | -1.5252692 |
| NR1I3   | 4.56E-06 | -1.5849316 |
| FMO4    | 4.73E-06 | -1.0819284 |
| ASGR1   | 4.74E-06 | -1.1880659 |
| FOSB    | 4.98E-06 | -2.2566663 |
| ACADVL  | 5.00E-06 | -1.2958758 |
| SHBG    | 5.03E-06 | -1.5071435 |

|         |          |            |
|---------|----------|------------|
| SLC38A4 | 5.31E-06 | -1.9254105 |
| OAT     | 5.33E-06 | -2.1693477 |
| ENO3    | 5.67E-06 | -1.7925274 |
| TUBE1   | 5.68E-06 | -1.1683715 |
| AGXT2   | 6.03E-06 | -1.5534525 |
| KHK     | 6.06E-06 | -1.0255014 |
| HPD     | 6.25E-06 | -3.5060439 |
| LY6E    | 6.34E-06 | -1.6335249 |
| CYP3A43 | 6.42E-06 | -1.8652677 |
| FMO3    | 6.50E-06 | -2.0626914 |
| ZG16    | 6.67E-06 | -1.8749319 |
| EXPH5   | 7.04E-06 | -1.562592  |
| ABCA6   | 7.65E-06 | -1.4386179 |
| P2RY13  | 7.67E-06 | -1.1015402 |
| ETS2    | 8.17E-06 | -1.4549824 |
| RBP5    | 8.25E-06 | -1.5140043 |
| DHODH   | 8.35E-06 | -1.2245607 |
| HBB     | 8.62E-06 | -1.7149994 |
| AGXT    | 9.28E-06 | -1.9915725 |
| CPN2    | 9.37E-06 | -1.464027  |
| CDH19   | 9.65E-06 | -1.1414375 |
| CYP8B1  | 9.87E-06 | -2.5830588 |
| CYB5A   | 1.03E-05 | -1.0943156 |
| C1S     | 1.05E-05 | -1.6409663 |
| LIPC    | 1.07E-05 | -1.7601706 |
| RSPO3   | 1.08E-05 | -1.4598102 |
| GPR128  | 1.09E-05 | -1.237051  |
| CTSO    | 1.09E-05 | -1.335739  |
| PIPOX   | 1.11E-05 | -1.5390281 |
| HAO1    | 1.12E-05 | -2.0473897 |
| SLC1A2  | 1.17E-05 | -1.7939198 |
| CYP2C18 | 1.18E-05 | -1.848742  |
| SEC14L2 | 1.21E-05 | -1.4172308 |
| FABP1   | 1.36E-05 | -2.6030113 |
| CAPN3   | 1.37E-05 | -1.306311  |
| SDPR    | 1.42E-05 | -1.0013868 |
| PRELP   | 1.45E-05 | -1.1033983 |
| ENPEP   | 1.51E-05 | -1.0226632 |
| KDM8    | 1.55E-05 | -1.0227209 |
| PDGFRA  | 1.55E-05 | -1.3522976 |
| SLCO1B1 | 1.67E-05 | -2.0560127 |
| ACAT1   | 1.71E-05 | -1.1596309 |
| PDK4    | 1.75E-05 | -2.0277851 |
| AASS    | 1.80E-05 | -1.2677546 |
| VSIG4   | 1.81E-05 | -1.2847912 |
| NTN4    | 1.83E-05 | -1.0130808 |

|          |          |            |
|----------|----------|------------|
| SLC46A3  | 1.83E-05 | -1.4857492 |
| ASPDH    | 1.84E-05 | -1.17733   |
| ANGPTL3  | 1.87E-05 | -1.6075464 |
| SLC23A2  | 1.93E-05 | -1.0008442 |
| PPP1R1A  | 1.95E-05 | -1.8483011 |
| FETUB    | 2.00E-05 | -2.023818  |
| IL33     | 2.11E-05 | -1.1234478 |
| FERMT2   | 2.26E-05 | -1.0088037 |
| GADD45A  | 2.27E-05 | -1.4641191 |
| DAK      | 2.29E-05 | -1.2411767 |
| PANK1    | 2.33E-05 | -1.3990975 |
| CPN1     | 2.51E-05 | -1.3116844 |
| BCHE     | 2.65E-05 | -2.0969587 |
| HAND2    | 2.72E-05 | -1.1307216 |
| THRSP    | 3.10E-05 | -2.1712677 |
| FITM1    | 3.16E-05 | -1.0834288 |
| ADAMTSL2 | 3.28E-05 | -1.1548567 |
| CSRNP1   | 3.35E-05 | -1.1421555 |
| MPDZ     | 3.48E-05 | -1.1509399 |
| ACOX1    | 3.53E-05 | -1.0152658 |
| GLYATL1  | 3.62E-05 | -1.6966682 |
| SPTBN2   | 3.69E-05 | -1.0399816 |
| SLC17A3  | 3.80E-05 | -1.0938556 |
| ALPL     | 3.90E-05 | -1.2802054 |
| ANG      | 3.98E-05 | -1.2373869 |
| MGMT     | 4.12E-05 | -1.0827213 |
| ACOX2    | 4.31E-05 | -1.2821118 |
| CRYL1    | 4.36E-05 | -1.114567  |
| IRF8     | 4.64E-05 | -1.1745495 |
| FAH      | 4.84E-05 | -1.2472107 |
| MST1     | 4.92E-05 | -1.0355509 |
| ASGR2    | 4.96E-05 | -1.3142555 |
| APOC3    | 5.05E-05 | -1.5465055 |
| HMGCS2   | 5.37E-05 | -1.6687435 |
| CPT2     | 5.62E-05 | -1.2464245 |
| PRG4     | 5.69E-05 | -1.1686338 |
| AKR1C4   | 5.90E-05 | -1.3125765 |
| STEAP4   | 5.91E-05 | -1.8021625 |
| GOT2     | 6.01E-05 | -1.0108088 |
| ATOH8    | 6.04E-05 | -1.0135364 |
| GCGR     | 6.35E-05 | -1.282817  |
| BASP1    | 6.35E-05 | -1.4305113 |
| SAA4     | 6.48E-05 | -2.3879469 |
| FOLH1    | 6.53E-05 | -1.0995657 |
| CDHR2    | 6.72E-05 | -1.7205634 |

|           |             |            |
|-----------|-------------|------------|
| CFHR4     | 6.77E-05    | -2.1247856 |
| AQP9      | 6.90E-05    | -2.0016797 |
| FAM149A   | 6.91E-05    | -1.0659132 |
| CD163     | 7.02E-05    | -1.3588536 |
| HSD17B6   | 7.02E-05    | -2.0551356 |
| TFR2      | 7.23E-05    | -1.0582243 |
| CBS       | 7.30E-05    | -1.1218411 |
| TSLP      | 7.65E-05    | -1.1018582 |
| FMO2      | 7.75E-05    | -1.0422269 |
| HP        | 7.87E-05    | -1.1901597 |
| ID2       | 8.21E-05    | -1.5315926 |
| CPS1      | 8.51E-05    | -2.179981  |
| SLC25A15  | 8.56E-05    | -1.3820126 |
| TM6SF2    | 8.70E-05    | -1.1198199 |
| FGB       | 9.27E-05    | -1.4359463 |
| MTTP      | 9.55E-05    | -1.5119986 |
| TFPI2     | 9.63E-05    | -1.2230743 |
| GPR125    | 9.78E-05    | -1.1907802 |
| SLC2A2    | 0.000101969 | -1.3352046 |
| C14orf180 | 0.000103563 | -1.1449344 |
| DPYS      | 0.000109575 | -1.7073471 |
| B3GAT1    | 0.000111003 | -1.4937961 |
| TMEM45A   | 0.000114721 | -1.7305069 |
| ADAMTS1   | 0.000116819 | -1.2742087 |
| HGD       | 0.000118264 | -1.3693647 |
| CLDN10    | 0.000122468 | -1.1282272 |
| APOA1     | 0.000123467 | -2.0804865 |
| HYAL1     | 0.000125267 | -1.1251024 |
| ARG1      | 0.000134112 | -1.7396969 |
| MXRA5     | 0.000145033 | -1.2555809 |
| CYP3A5    | 0.000145615 | -1.166449  |
| IFITM1    | 0.000147722 | -1.3210762 |
| FLJ22763  | 0.000152168 | -1.0679601 |
| SLCO2B1   | 0.000154221 | -1.0318135 |
| CA2       | 0.000155491 | -2.2364687 |
| CNGA1     | 0.00015806  | -1.2275804 |
| SLC7A2    | 0.000158282 | -1.5504051 |
| SLC1A1    | 0.000162037 | -1.2989023 |
| LINC01093 | 0.000164564 | -1.2541159 |
| QDPR      | 0.000171934 | -1.0976519 |
| CPB2      | 0.000174972 | -1.2313178 |
| ALB       | 0.000176961 | -1.9201755 |
| UPB1      | 0.000179226 | -1.1428969 |
| UGP2      | 0.000181881 | -1.0390077 |
| ABLIM3    | 0.000185965 | -1.1648345 |
| F12       | 0.000200223 | -1.0071147 |

|          |             |            |
|----------|-------------|------------|
| CDO1     | 0.000203719 | -1.6763752 |
| TRIM22   | 0.000203733 | -1.2539243 |
| SLC41A2  | 0.000211506 | -1.2146323 |
| HSD17B13 | 0.000221191 | -2.3973133 |
| GGT5     | 0.000221391 | -1.1083722 |
| HPR      | 0.000225829 | -1.8008449 |
| SLC27A2  | 0.000226942 | -1.9737506 |
| HSD17B2  | 0.000229041 | -1.9572696 |
| KCNJ8    | 0.00022925  | -1.1674682 |
| ABCG2    | 0.000233535 | -1.1069897 |
| ANO1     | 0.000234914 | -1.2749304 |
| ABCB4    | 0.000249352 | -1.3510246 |
| CDA      | 0.000264217 | -1.0995867 |
| DAO      | 0.000277798 | -1.0363294 |
| C4BPA    | 0.000280794 | -1.5882554 |
| TRIB1    | 0.000285336 | -1.4093616 |
| MFAP4    | 0.000297745 | -1.2495703 |
| CYP4V2   | 0.000298926 | -1.1734598 |
| HLF      | 0.000310915 | -1.2313167 |
| DUSP6    | 0.00032786  | -1.050273  |
| TPD52L1  | 0.000344125 | -1.0221213 |
| LEAP2    | 0.000368087 | -1.4878807 |
| HABP2    | 0.000374814 | -1.2404175 |
| ANGPTL4  | 0.000403571 | -1.2940748 |
| CTNNA3   | 0.000403577 | -1.1543238 |
| CD302    | 0.000405575 | -1.0950159 |
| ITLN1    | 0.000432122 | -1.2378965 |
| PALM3    | 0.000436375 | -1.0726101 |
| ADII     | 0.000496713 | -1.0648463 |
| GLUD1    | 0.000503756 | -1.093838  |
| ADH1C    | 0.000510485 | -1.2977988 |
| LIPG     | 0.00051268  | -1.1832198 |
| PLIN1    | 0.000517586 | -1.4305943 |
| BGN      | 0.000530973 | -1.0116124 |
| CYP1A1   | 0.000536918 | -1.6921774 |
| OTC      | 0.000549114 | -1.5379012 |
| HOGA1    | 0.000557047 | -1.1001015 |
| PHGDH    | 0.000559799 | -1.3876934 |
| MOGAT1   | 0.000582719 | -1.1156595 |
| MFAP3L   | 0.000600771 | -1.0150857 |
| PSD3     | 0.000608824 | -1.0017099 |
| AADAC    | 0.00063187  | -1.2934903 |
| HAPLN4   | 0.000684126 | -1.0141286 |
| F2       | 0.000713905 | -1.0746115 |
| MT1HL1   | 0.000725717 | -1.4676789 |
| CYFIP2   | 0.0007352   | -1.0576865 |

|          |             |            |
|----------|-------------|------------|
| MME      | 0.000835829 | -1.6447288 |
| APOL1    | 0.000852927 | -1.2010065 |
| BDH1     | 0.00090988  | -1.0485763 |
| SLC22A7  | 0.000916685 | -1.4958922 |
| SDS      | 0.000929495 | -2.5191715 |
| ITIH1    | 0.000931685 | -1.4477904 |
| TTR      | 0.00093332  | -1.4693121 |
| SERPINA6 | 0.000980769 | -1.0707458 |
| FBLN5    | 0.001022876 | -1.5423406 |
| ERRFI1   | 0.001034065 | -1.3451668 |
| FREM2    | 0.001041551 | -1.423358  |
| RUNDC3B  | 0.001045787 | -1.0784301 |
| UGT2B7   | 0.001057836 | -1.2165081 |
| CES2     | 0.001078837 | -1.3456564 |
| GREM2    | 0.001080093 | -1.5223523 |
| C3P1     | 0.001087367 | -1.9017435 |
| GATM     | 0.001123091 | -1.0128941 |
| IGJ      | 0.001134094 | -1.3557586 |
| IYD      | 0.001260193 | -1.1341978 |
| ACMSD    | 0.001307629 | -1.2130487 |
| CCL21    | 0.001318174 | -1.5507558 |
| CNTN3    | 0.001324634 | -1.1623865 |
| ACOT12   | 0.001348643 | -1.6220739 |
| RNF165   | 0.001374245 | -1.0723724 |
| SLC39A5  | 0.001436058 | -1.0479264 |
| CHRNA4   | 0.001446628 | -1.2816826 |
| GPT2     | 0.001574891 | -1.1803055 |
| CUX2     | 0.001591344 | -1.3141399 |
| NR0B2    | 0.001640437 | -1.0075627 |
| AVPR1A   | 0.00177515  | -1.2005762 |
| DNMT3L   | 0.002001866 | -1.1071631 |
| SULT1E1  | 0.002032046 | -1.3114032 |
| PGLYRP2  | 0.002162559 | -1.5232488 |
| SLC13A5  | 0.002207227 | -1.6020997 |
| A1BG     | 0.002362581 | -1.2642676 |
| AGTR1    | 0.002449375 | -1.7289914 |
| BRP44L   | 0.002573973 | -1.0586355 |
| CYP4A22  | 0.002712234 | -1.2000426 |
| CFHR3    | 0.002758841 | -1.4809904 |
| CYR61    | 0.00291378  | -1.4900366 |
| A2M      | 0.002983048 | -1.2490105 |
| HRG      | 0.003298499 | -2.2012928 |
| CDH1     | 0.003435977 | -1.0003448 |
| CRISPLD2 | 0.003648226 | -1.414394  |
| GC       | 0.003686733 | -1.0200428 |
| RBP1     | 0.00446451  | -1.2188022 |

|          |             |            |
|----------|-------------|------------|
| GOT1     | 0.004872067 | -1.1259044 |
| AMDHD1   | 0.004885052 | -1.2998797 |
| FAM180A  | 0.005242057 | -1.2806427 |
| SERPINA7 | 0.005614088 | -1.3074828 |
| RNASE4   | 0.005796071 | -1.0041055 |
| SERPINC1 | 0.005844526 | -1.3015281 |
| CCL19    | 0.006030173 | -1.0013918 |
| ACSM2A   | 0.006417234 | -1.1804805 |
| CYP2B7P1 | 0.006822611 | -1.0708784 |
| PPARGC1A | 0.007029251 | -1.5357462 |
| APOC4    | 0.007991636 | -1.4533096 |
| INMT     | 0.008071442 | -1.4220324 |
| C5orf27  | 0.008346364 | -1.1966093 |
| APCS     | 0.008416451 | -1.7950957 |
| MT1L     | 0.008599594 | -1.2960215 |
| DUSP5    | 0.008960751 | -1.1094205 |
| GK       | 0.009375324 | -1.036319  |
| PHLDA1   | 0.009418217 | -1.148951  |
| CD69     | 0.009895248 | -1.0157878 |

Table S2. KEGG analysis of the most significant genes

| Down genes |                        |           |          |                                                                                                                                                                                                                                                          |       |
|------------|------------------------|-----------|----------|----------------------------------------------------------------------------------------------------------------------------------------------------------------------------------------------------------------------------------------------------------|-------|
| ID         | Description            | GeneRatio | pvalue   | geneID                                                                                                                                                                                                                                                   | Count |
| hsa00071   | Fatty acid degradation | 32/514    | 1.09E-22 | ADH1A/ADH1B/A<br>DH1B/ADH1C/AD<br>H4/ADH4/ADH6/A<br>DH6/CPT2/CPT2/C<br>YP4A11/EHHADH<br>/ALDH2/ACSL1/A<br>CSL1/GCDH/GCD<br>H/CYP4A22/ACA<br>A1/ACAA1/ACAD<br>L/ACADM/ACAD<br>M/ACADS/ACAD<br>S/ACADSB/ACAD<br>SB/ACADV L/ACA<br>T1/ACAT1/ACOX<br>1/ACSL5 | 32    |

|          |                                     |        |          |                                                                                                                                                                                                                                                                                                                         |    |
|----------|-------------------------------------|--------|----------|-------------------------------------------------------------------------------------------------------------------------------------------------------------------------------------------------------------------------------------------------------------------------------------------------------------------------|----|
| hsa04610 | Complement and coagulation cascades | 37/514 | 1.81E-21 | <p> MASP2/VSIG4/CP<br/> B2/A2M/F2/F8/F9/<br/> F11/F12/F12/FGA/<br/> FGB/FGB/CFI/CFI/<br/> KLKB1/KLKB1/M<br/> BL2/SERPINC1/SE<br/> RPINC1/PLG/SER<br/> PINF2/PROC/PRO<br/> S1/PROS1/MASP1/<br/> SERPING1/SERPI<br/> NG1/C1R/C1S/C4<br/> BPA/C6/C7/C7/C8<br/> A/C8B/C9 </p>                                               | 37 |
| hsa03320 | PPAR signaling pathway              | 36/514 | 1.02E-18 | <p> SLC27A5/SLC27A<br/> 2/APOA5/APOA5/<br/> CPT2/CPT2/CYP8<br/> B1/EHHADH/FAB<br/> P1/FABP1/FABP1/<br/> ACSL1/ACSL1/GK<br/> /GK/ACAA1/ACA<br/> A1/HMGCS2/HM<br/> GCS2/ACADL/AP<br/> OA1/APOA1/ACA<br/> DM/ACADM/APO<br/> C3/APOC3/ACOX<br/> 1/PCK1/PCK2/AN<br/> GPTL4/ACSL5/PLI<br/> N1/SCP2/SCP2/SC<br/> P2/ACOX2 </p> | 36 |



|          |                                            |        |          |                                                                                                                                                                                                            |    |
|----------|--------------------------------------------|--------|----------|------------------------------------------------------------------------------------------------------------------------------------------------------------------------------------------------------------|----|
| hsa00830 | Retinol metabolism                         | 31/514 | 1.92E-18 | ADH1A/ADH1B/ADH1B/ADH1C/ADH4/ADH4/ADH6/ADH6/CYP1A1/CYP1A1/CYP1A2/CYP2A6/CYP2B6/CYP2C8/CYP2C9/CYP2C9/CYP2C18/CYP2C18/CYP3A4/CYP3A4/CYP3A5/CYP4A11/CYP26A1/AOX1/RDH5/RDH5/UGT2B7/RDH16/RDH16/HSD17B6/HSD17B6 | 31 |
| hsa00280 | Valine, leucine and isoleucine degradation | 28/514 | 1.50E-17 | ABAT/ABAT/EHHADH/ALDH2/ACA A1/ACAA1/HMGC L/HMGCS2/HMG CS2/AOX1/ACAD M/ACADM/ACAD S/ACADS/ACADS B/ACADSB/IVD/IVD/ACAT1/ACAT 1/ALDH6A1/ALD H6A1/MUT/MUT/ MUT/BCKDHB/B CKDHB/AGXT2                            | 28 |
| hsa00260 | Glycine, serine and threonine metabolism   | 25/514 | 5.59E-16 | SDS/SDS/CTH/DAO/DAO/SARDH/S ARDH/AGXT/AL AS1/ALAS1/PHG DH/GATM/GATM /GNMT/GNMT/D MGDH/DMGDH/P IPOX/BHMT/BHM T/AGXT2/CBS/CBS/CBS/GRHPR                                                                      | 25 |

|          |                         |        |          |                                                                                                                                                                                                                        |    |
|----------|-------------------------|--------|----------|------------------------------------------------------------------------------------------------------------------------------------------------------------------------------------------------------------------------|----|
| hsa05204 | Chemical carcinogenesis | 32/514 | 8.59E-15 | NAT2/NAT2/ADH1A/ADH1B/ADH1B/ADH1C/ADH4/ADH4/ADH6/ADH6/CYP1A1/CYP1A1/CYP1A2/CYP2A6/CYP2A13/CYP2C19/CYP2C8/CYP2C9/CYP2C9/CYP2C18/CYP2C18/CYP2E1/CYP3A4/CYP3A4/CYP3A5/HSD11B1/HSD11B1/CYP3A43/SULT2A1/SULT2A1/UGT2B7/NAT1 | 32 |
| hsa00380 | Tryptophan metabolism   | 21/514 | 1.59E-13 | INMT/ACMSD/CYP1A1/CYP1A1/CYP1A2/IDO2/EHHA DH/ALDH2/HAAO/GCDH/GCDH/AOX1/ACAT1/ACAT1/AADAT/AADAT/OGDHL/TDO2/CAT/KMO/KMO                                                                                                  | 21 |

|          |                                             |        |          |                                                                                                                                                                                                                                                                  |    |
|----------|---------------------------------------------|--------|----------|------------------------------------------------------------------------------------------------------------------------------------------------------------------------------------------------------------------------------------------------------------------|----|
| hsa01200 | Carbon metabolism                           | 38/514 | 1.87E-13 | SDS/SDS/CPS1/CP<br>S1/CPS1/AGXT/E<br>HHADH/ENO3/FB<br>P1/ALDOB/ALDO<br>B/PHGDH/GLUD1<br>/GLUD1/GOT1/GO<br>T1/GOT2/GPT/AC<br>ADM/ACADM/AC<br>ADS/ACADS/ACA<br>T1/ACAT1/ALDH<br>6A1/ALDH6A1/M<br>UT/MUT/MUT/HA<br>O2/HAO1/HAO1/O<br>GDHL/CAT/GPT2/<br>GPT2/RGN/RGN | 38 |
| hsa00250 | Alanine, aspartate and glutamate metabolism | 21/514 | 3.59E-13 | CPS1/CPS1/CPS1/<br>ABAT/ABAT/AG<br>XT/FOLH1/GLS2/<br>GLUD1/GLUD1/G<br>OT1/GOT1/GOT2/<br>GPT/ASPA/ASPA/<br>ASS1/ASS1/AGXT<br>2/GPT2/GPT2                                                                                                                          | 21 |
| hsa00350 | Tyrosine metabolism                         | 20/514 | 1.20E-12 | ADH1A/ADH1B/A<br>DH1B/ADH1C/AD<br>H4/ADH4/ADH6/A<br>DH6/DBH/FAH/G<br>OT1/GOT1/GOT2/<br>GSTZ1/GSTZ1/HG<br>D/AOX1/HPD/TA<br>T/TAT                                                                                                                                  | 20 |
| hsa00220 | Arginine biosynthesis                       | 16/514 | 3.37E-12 | CPS1/CPS1/CPS1/<br>GLS2/GLUD1/GL<br>UD1/GOT1/GOT1/<br>GOT2/GPT/ARG1/<br>ASS1/ASS1/OTC/<br>GPT2/GPT2                                                                                                                                                              | 16 |

|          |                                              |        |          |                                                                                                                                                                                |    |
|----------|----------------------------------------------|--------|----------|--------------------------------------------------------------------------------------------------------------------------------------------------------------------------------|----|
| hsa00982 | Drug metabolism - cytochrome P450            | 27/514 | 7.83E-12 | ADH1A/ADH1B/ADH1B/ADH1C/ADH4/ADH4/ADH6/ADH6/CYP1A2/CYP2A6/CYP2B6/CYP2C19/CYP2C8/CYP2C9/CYP2C9/CYP2E1/CYP3A4/CYP3A4/CYP3A5/FMO2/FMO2/FMO3/FMO3/FMO3/FMO4/AOX1/UGT2B7            | 27 |
| hsa01230 | Biosynthesis of amino acids                  | 28/514 | 9.42E-12 | SDS/SDS/CPS1/CPS1/CPS1/CTH/ENO3/ALDOB/ALDOB/PHGDH/GOT1/GOT1/GOT2/GPT/ARG1/MAT1A/ASS1/ASS1/OTC/AADAT/AADAT/TAT/TAT/GPT2/GPT2/CBS/CBS/CBS                                        | 28 |
| hsa00980 | Metabolism of xenobiotics by cytochrome P450 | 26/514 | 9.10E-11 | ADH1A/ADH1B/ADH1B/ADH1C/ADH4/ADH4/ADH6/ADH6/CYP1A1/CYP1A1/CYP1A2/CYP2A6/CYP2A13/CYP2B6/CYP2C9/CYP2C9/CYP2E1/CYP3A4/CYP3A4/CYP3A5/AKR7A3/HSD11B1/HSD11B1/SULT2A1/SULT2A1/UGT2B7 | 26 |

|          |                      |        |          |                                                                                                                                                                       |    |
|----------|----------------------|--------|----------|-----------------------------------------------------------------------------------------------------------------------------------------------------------------------|----|
| hsa00650 | Butanoate metabolism | 16/514 | 1.50E-10 | ACSM2A/ABAT/ABAT/EHHADH/HMGCL/HMGCS2/HMGCS2/ACADS/ACADS/ACAT1/CAT1/ACSM5/BDH2/BDH2/BDH1/ACSM3                                                                         | 16 |
| hsa04976 | Bile secretion       | 24/514 | 1.88E-09 | SLCO1B1/SLCO1B1/SLCO1B1/SLC22A7/SLC27A5/CYP3A4/CYP3A4/SLCO1B3/SLCO1B3/AQP9/KCNN2/BCB4/SLC10A1/SLC10A1/SLC22A1/SULT2A1/SULT2A1/CA2/CA2/NR0B2/SLC4A4/SLC4A4/ABCG2/ABCG2 | 24 |
| hsa04146 | Peroxisome           | 24/514 | 3.31E-09 | SLC27A2/DAO/DAO/AGXT/EHHA DH/EPHX2/ACSL1/ACSL1/ACAA1/ACAA1/HMGCL/ACOX1/HAO2/PIPOX/ACSL5/HAO1/HAO1/PXMP2/SCP2/SCP2/XDH/ACOX2/CAT                                       | 24 |

|          |                                    |        |          |                                                                                                                                                                                 |    |
|----------|------------------------------------|--------|----------|---------------------------------------------------------------------------------------------------------------------------------------------------------------------------------|----|
| hsa01212 | Fatty acid metabolism              | 19/514 | 1.00E-08 | CPT2/CPT2/EHHA<br>DH/ACSL1/ACSL1<br>/ACAA1/ACAA1/<br>ACADL/ACADM/<br>ACADM/ACADS/<br>ACADS/ACADSB/<br>ACADSB/ACADV<br>L/ACAT1/ACAT1/<br>ACOX1/ACSL5                             | 19 |
| hsa00640 | Propanoate metabolism              | 15/514 | 3.12E-08 | ABAT/ABAT/EHH<br>ADH/ACACB/AC<br>ADM/ACADM/AC<br>AT1/ACAT1/ALD<br>H6A1/ALDH6A1/<br>MUT/MUT/MUT/<br>BCKDHB/BCKDHB                                                                | 15 |
| hsa00140 | Steroid hormone biosynthesis       | 19/514 | 3.69E-08 | AKR1C4/CYP1A1/<br>CYP1A1/CYP1A2/<br>CYP2E1/CYP3A4/<br>CYP3A4/CYP3A5/<br>HSD11B1/HSD11B<br>1/HSD17B2/SRD5<br>A1/SRD5A2/AKR1<br>D1/SULT1E1/SUL<br>T1E1/UGT2B7/HS<br>D17B6/HSD17B6 | 19 |
| hsa00270 | Cysteine and methionine metabolism | 17/514 | 6.34E-08 | CDO1/SDS/SDS/C<br>TH/GOT1/GOT1/G<br>OT2/MAT1A/ADI1<br>/BHMT/BHMT/AG<br>XT2/TAT/TAT/CB<br>S/CBS/CBS                                                                              | 17 |

|          |                                            |        |          |                                                                              |    |
|----------|--------------------------------------------|--------|----------|------------------------------------------------------------------------------|----|
| hsa00410 | beta-Alanine metabolism                    | 13/514 | 3.42E-07 | ABAT/ABAT/DPYS/EHHADH/ALDH2/ACADM/ACADM/ALDH6A1/ALDH6A1/UPB1/UPB1/UPB1/CNDP1 | 13 |
| hsa00072 | Synthesis and degradation of ketone bodies | 8/514  | 4.30E-07 | HMGCL/HMGCS2/HMGCS2/ACAT1/ACAT1/BDH2/BDH2/BDH1                               | 8  |
| hsa00120 | Primary bile acid biosynthesis             | 9/514  | 6.68E-07 | SLC27A5/AKR1C4/CYP8B1/CYP39A1/SCP2/SCP2/SCP2/AKR1D1/ACOX2                    | 9  |
| hsa00630 | Glyoxylate and dicarboxylate metabolism    | 12/514 | 1.48E-06 | HOGA1/AGXT/ACAT1/ACAT1/MUT/MUT/MUT/HAO2/HAO1/HAO1/CAT/GRHPR                  | 12 |
| hsa00983 | Drug metabolism - other enzymes            | 14/514 | 9.09E-06 | NAT2/NAT2/CYP2A6/CYP3A4/CYP3A4/DPYS/UPB1/UPB1/UPB1/UGT2B7/XDH/CES2/NAT1/CDA  | 14 |
| hsa00330 | Arginine and proline metabolism            | 14/514 | 1.80E-05 | HOGA1/DAO/DAO/ALDH2/GATM/GATM/GOT1/GOT1/GOT2/ARG1/OAT/OAT/PRODH2/CNDP1       | 14 |
| hsa04964 | Proximal tubule bicarbonate reclamation    | 9/514  | 3.11E-05 | GLS2/GLUD1/GLUD1/PCK1/PCK2/CA2/CA2/SLC4A4/SLC4A4                             | 9  |

|          |                                 |        |             |                                                                                           |    |
|----------|---------------------------------|--------|-------------|-------------------------------------------------------------------------------------------|----|
| hsa01210 | 2-Oxocarboxylic acid metabolism | 8/514  | 4.48E-05    | GOT1/GOT1/GOT2/GPT/AADAT/AADAT/GPT2/GPT2                                                  | 8  |
| hsa00591 | Linoleic acid metabolism        | 9/514  | 5.19E-05    | CYP1A2/CYP2C19/CYP2C8/CYP2C9/CYP2C9/CYP2E1/CYP2J2/CYP3A4/CYP3A4                           | 9  |
| hsa00010 | Glycolysis / Gluconeogenesis    | 16/514 | 7.98E-05    | ADH1A/ADH1B/ADH1B/ADH1C/ADH4/ADH4/ADH6/ADH6/ENO3/ALDH2/FBP1/ALDOB/ALDOB/PCK1/PCK2/PGM1    | 16 |
| hsa00310 | Lysine degradation              | 13/514 | 8.03E-05    | AASS/AASS/EHHADH/ALDH2/GCDH/GCDH/ACAT1/ACAT1/AADAT/AADAT/PIPOX/OGDHL/BBOX1                | 13 |
| hsa00790 | Folate biosynthesis             | 7/514  | 0.000151737 | GPHN/ALPL/ALPL/GCH1/GCH1/QDPR/QDPR                                                        | 7  |
| hsa00590 | Arachidonic acid metabolism     | 13/514 | 0.000184867 | CYP2B6/CYP2C19/CYP2C8/CYP2C9/CYP2C9/CYP2E1/CYP2J2/CYP4A11/EPHX2/GGT5/CYP4F3/CYP4F3/CYP4F2 | 13 |
| hsa00340 | Histidine metabolism            | 8/514  | 0.000212748 | FTCD/UROC1/AMDHD1/AMDHD1/ALDH2/ASPA/ASPA/CNDP1                                            | 8  |
| hsa00360 | Phenylalanine metabolism        | 7/514  | 0.000433483 | GLYAT/GOT1/GOT1/GOT2/HPD/TAT/TAT                                                          | 7  |



| hsa00910        | Nitrogen metabolism                   | 7/514     | 0.000546282 | CPS1/CPS1/CPS1/<br>GLUD1/GLUD1/C<br>A2/CA2                               | 7     |
|-----------------|---------------------------------------|-----------|-------------|--------------------------------------------------------------------------|-------|
| hsa04978        | Mineral absorption                    | 11/514    | 0.001221249 | MT1E/MT1F/MT1<br>G/MT1H/MT1H/M<br>T1M/MT1M/MT1<br>X/MT1X/MT2A/M<br>T1HL1 | 11    |
| hsa05020        | Prion diseases                        | 9/514     | 0.002715674 | EGR1/EGR1/FYN/<br>C6/C7/C7/C8A/C8<br>B/C9                                | 9     |
| hsa00430        | Taurine and hypotaurine<br>metabolism | 5/514     | 0.002937681 | CDO1/GGT5/CSA<br>D/CSAD/CSAD                                             | 5     |
| hsa00620        | Pyruvate metabolism                   | 9/514     | 0.00306143  | ACOT12/LDHD/A<br>LDH2/ACACB/AC<br>AT1/ACAT1/PCK1<br>/PCK2/GRHPR          | 9     |
| hsa00770        | Pantothenate and CoA<br>biosynthesis  | 5/514     | 0.003694284 | DPYS/UPB1/UPB1<br>/UPB1/PANK1                                            | 5     |
| hsa00500        | Starch and sucrose metabolism         | 7/514     | 0.007775888 | AGL/AGL/GYS2/P<br>GM1/GBA3/GBA3<br>/UGP2                                 | 7     |
| hsa04975        | Fat digestion and absorption          | 8/514     | 0.008538551 | FABP1/FABP1/FA<br>BP1/GOT2/APOA1<br>/APOA1/MTPP/M<br>OGAT2               | 8     |
| <b>Up genes</b> |                                       |           |             |                                                                          |       |
| ID              | Description                           | GeneRatio | pvalue      | geneID                                                                   | Count |
| hsa04110        | Cell cycle                            | 10/47     | 1.45E-08    | E2F1/E2F1/SFN/B<br>UB1B/TTK/CCNA<br>2/CCNB2/PTTG1/P<br>TTG1/CDK1         | 10    |
| hsa04218        | Cellular senescence                   | 7/47      | 0.000248877 | E2F1/E2F1/FOXM<br>1/FOXM1/CCNA2/<br>CCNB2/CDK1                           | 7     |
| hsa04115        | p53 signaling pathway                 | 4/47      | 0.001042149 | SFN/RRM2/CCNB<br>2/CDK1                                                  | 4     |
| hsa05218        | Melanoma                              | 4/47      | 0.001306003 | E2F1/E2F1/FGF13/<br>FGF13                                                | 4     |

|          |                          |      |            |                          |   |
|----------|--------------------------|------|------------|--------------------------|---|
| hsa04512 | ECM-receptor interaction | 4/47 | 0.00252059 | HMMR/SPP1/SPP1<br>/THBS4 | 4 |
|----------|--------------------------|------|------------|--------------------------|---|

Table S3. GO analysis of the most significant genes

| GO_CC_up_sig_gene |                                                     |           |             |       |
|-------------------|-----------------------------------------------------|-----------|-------------|-------|
| ID                | Description                                         | GeneRatio | pvalue      | Count |
| GO:0005819        | spindle                                             | 14/80     | 3.07E-11    | 14    |
| GO:0030496        | midbody                                             | 10/80     | 3.77E-10    | 10    |
| GO:0005874        | microtubule                                         | 11/80     | 1.34E-06    | 11    |
| GO:0000777        | condensed chromosome<br>kinetochore                 | 6/80      | 5.55E-06    | 6     |
| GO:0000779        | condensed chromosome,<br>centromeric region         | 6/80      | 9.13E-06    | 6     |
| GO:0000940        | condensed chromosome outer<br>kinetochore           | 3/80      | 1.82E-05    | 3     |
| GO:0000776        | kinetochore                                         | 6/80      | 2.39E-05    | 6     |
| GO:0000793        | condensed chromosome                                | 7/80      | 3.28E-05    | 7     |
| GO:0005876        | spindle microtubule                                 | 4/80      | 9.78E-05    | 4     |
| GO:0072686        | mitotic spindle                                     | 4/80      | 0.000105141 | 4     |
| GO:0005871        | kinesin complex                                     | 4/80      | 0.000112847 | 4     |
| GO:0000775        | chromosome, centromeric                             | 6/80      | 0.000171779 | 6     |
| GO:0051233        | spindle midzone                                     | 3/80      | 0.00023113  | 3     |
| GO:0000922        | spindle pole                                        | 5/80      | 0.000239828 | 5     |
| GO:0005875        | microtubule associated complex                      | 5/80      | 0.000475339 | 5     |
| GO:0098687        | chromosomal region                                  | 7/80      | 0.000815289 | 7     |
| GO:0000778        | condensed nuclear chromosome<br>kinetochore         | 2/80      | 0.000863253 | 2     |
| GO:0070938        | contractile ring                                    | 2/80      | 0.000863253 | 2     |
| GO:0097431        | mitotic spindle pole                                | 2/80      | 0.000863253 | 2     |
| GO:0005813        | centrosome                                          | 8/80      | 0.001382832 | 8     |
| GO:0045120        | pronucleus                                          | 2/80      | 0.0017256   | 2     |
| GO:0032153        | cell division site                                  | 3/80      | 0.001797573 | 3     |
| GO:0032155        | cell division site part                             | 3/80      | 0.001797573 | 3     |
| GO:0000780        | condensed nuclear chromosome,<br>centromeric region | 2/80      | 0.003196098 | 2     |
| GO:0005680        | anaphase-promoting complex                          | 2/80      | 0.004280318 | 2     |
| GO:0031225        | anchored component of                               | 4/80      | 0.005095593 | 4     |
| GO_BP_up_sig_gene |                                                     |           |             |       |
| ID                | Description                                         | GeneRatio | pvalue      | Count |
| GO:0007067        | mitotic nuclear division                            | 22/78     | 2.37E-17    | 22    |
| GO:0007059        | chromosome segregation                              | 17/78     | 8.38E-14    | 17    |
| GO:0098813        | nuclear chromosome                                  | 16/78     | 1.07E-13    | 16    |
| GO:0044770        | cell cycle phase transition                         | 19/78     | 4.67E-13    | 19    |
| GO:0000819        | sister chromatid segregation                        | 14/78     | 1.00E-12    | 14    |
| GO:0000070        | mitotic sister chromatid                            | 12/78     | 1.02E-12    | 12    |

|            |                                                            |       |          |    |
|------------|------------------------------------------------------------|-------|----------|----|
| GO:0044772 | mitotic cell cycle phase                                   | 18/78 | 1.98E-12 | 18 |
| GO:0007093 | mitotic cell cycle checkpoint                              | 10/78 | 2.04E-09 | 10 |
| GO:1901987 | regulation of cell cycle phase transition                  | 13/78 | 2.24E-09 | 13 |
| GO:0007346 | regulation of mitotic cell cycle                           | 15/78 | 3.35E-09 | 15 |
| GO:0000075 | cell cycle checkpoint                                      | 11/78 | 6.18E-09 | 11 |
| GO:0000281 | mitotic cytokinesis                                        | 6/78  | 8.64E-09 | 6  |
| GO:1901990 | regulation of mitotic cell cycle phase transition          | 12/78 | 1.11E-08 | 12 |
| GO:0090068 | positive regulation of cell cycle process                  | 11/78 | 1.12E-08 | 11 |
| GO:0000910 | cytokinesis                                                | 9/78  | 1.30E-08 | 9  |
| GO:0045786 | negative regulation of cell cycle                          | 14/78 | 1.73E-08 | 14 |
| GO:0051304 | chromosome separation                                      | 7/78  | 2.59E-08 | 7  |
| GO:0061640 | cytoskeleton-dependent                                     | 6/78  | 3.40E-08 | 6  |
| GO:0045930 | negative regulation of mitotic cell cycle                  | 10/78 | 4.84E-08 | 10 |
| GO:0030071 | regulation of mitotic metaphase/anaphase transition        | 6/78  | 5.28E-08 | 6  |
| GO:1902099 | regulation of metaphase/anaphase transition                | 6/78  | 6.08E-08 | 6  |
| GO:0007091 | metaphase/anaphase transition of mitotic cell cycle        | 6/78  | 6.96E-08 | 6  |
| GO:0010965 | regulation of mitotic sister chromatid separation          | 6/78  | 6.96E-08 | 6  |
| GO:0051983 | regulation of chromosome segregation                       | 7/78  | 7.55E-08 | 7  |
| GO:0044784 | metaphase/anaphase transition of cell cycle                | 6/78  | 7.95E-08 | 6  |
| GO:0051306 | mitotic sister chromatid                                   | 6/78  | 9.05E-08 | 6  |
| GO:0033047 | regulation of mitotic sister chromatid segregation         | 6/78  | 1.66E-07 | 6  |
| GO:0007088 | regulation of mitotic nuclear division                     | 8/78  | 1.95E-07 | 8  |
| GO:0045787 | positive regulation of cell cycle                          | 11/78 | 2.32E-07 | 11 |
| GO:1901991 | negative regulation of mitotic cell cycle phase transition | 8/78  | 3.78E-07 | 8  |
| GO:0033045 | regulation of sister chromatid segregation                 | 6/78  | 3.90E-07 | 6  |
| GO:0051783 | regulation of nuclear division                             | 8/78  | 6.61E-07 | 8  |
| GO:1901988 | negative regulation of cell cycle phase transition         | 8/78  | 6.61E-07 | 8  |
| GO:0010948 | negative regulation of cell cycle process                  | 9/78  | 8.21E-07 | 9  |
| GO:0000086 | G2/M transition of mitotic cell                            | 8/78  | 2.39E-06 | 8  |

|            |                                                                    |       |             |    |
|------------|--------------------------------------------------------------------|-------|-------------|----|
| GO:0000226 | microtubule cytoskeleton organization                              | 11/78 | 2.87E-06    | 11 |
| GO:0007052 | mitotic spindle organization                                       | 5/78  | 2.88E-06    | 5  |
| GO:0044839 | cell cycle G2/M phase transition                                   | 8/78  | 3.40E-06    | 8  |
| GO:0007094 | mitotic spindle assembly                                           | 4/78  | 8.33E-06    | 4  |
| GO:0071173 | spindle assembly checkpoint                                        | 4/78  | 9.63E-06    | 4  |
| GO:0045841 | negative regulation of mitotic metaphase/anaphase transition       | 4/78  | 1.11E-05    | 4  |
| GO:0071174 | mitotic spindle checkpoint                                         | 4/78  | 1.11E-05    | 4  |
| GO:2000816 | negative regulation of mitotic sister chromatid separation         | 4/78  | 1.11E-05    | 4  |
| GO:0051231 | spindle elongation                                                 | 3/78  | 1.15E-05    | 3  |
| GO:0051303 | establishment of chromosome localization                           | 5/78  | 1.21E-05    | 5  |
| GO:1902100 | negative regulation of metaphase/anaphase transition of cell cycle | 4/78  | 1.27E-05    | 4  |
| GO:0050000 | chromosome localization                                            | 5/78  | 1.31E-05    | 5  |
| GO:0033048 | negative regulation of mitotic sister chromatid segregation        | 4/78  | 1.44E-05    | 4  |
| GO:1903035 | negative regulation of response to wounding                        | 5/78  | 1.63E-05    | 5  |
| GO:0033046 | negative regulation of sister chromatid segregation                | 4/78  | 1.85E-05    | 4  |
| GO:0051985 | negative regulation of chromosome segregation                      | 4/78  | 2.08E-05    | 4  |
| GO:0031577 | spindle checkpoint                                                 | 4/78  | 2.33E-05    | 4  |
| GO:0033044 | regulation of chromosome organization                              | 6/78  | 3.54E-05    | 6  |
| GO:0051302 | regulation of cell division                                        | 6/78  | 3.54E-05    | 6  |
| GO:0045839 | negative regulation of mitotic nuclear division                    | 4/78  | 3.94E-05    | 4  |
| GO:1903034 | regulation of response to                                          | 6/78  | 5.54E-05    | 6  |
| GO:0051310 | metaphase plate congression                                        | 4/78  | 6.79E-05    | 4  |
| GO:0007018 | microtubule-based movement                                         | 7/78  | 8.46E-05    | 7  |
| GO:0031570 | DNA integrity checkpoint                                           | 6/78  | 9.98E-05    | 6  |
| GO:0010389 | regulation of G2/M transition of mitotic cell cycle                | 4/78  | 0.000101204 | 4  |
| GO:0007051 | spindle organization                                               | 5/78  | 0.000104779 | 5  |
| GO:0051784 | negative regulation of nuclear division                            | 4/78  | 0.000109079 | 4  |
| GO:0044774 | mitotic DNA integrity                                              | 5/78  | 0.000115078 | 5  |
| GO:0044843 | cell cycle G1/S phase transition                                   | 7/78  | 0.000120314 | 7  |
| GO:2001251 | negative regulation of chromosome organization                     | 4/78  | 0.000165975 | 4  |

|            |                                                                               |      |             |   |
|------------|-------------------------------------------------------------------------------|------|-------------|---|
| GO:0061045 | negative regulation of wound healing                                          | 4/78 | 0.000177202 | 4 |
| GO:1902749 | regulation of cell cycle G2/M phase transition                                | 4/78 | 0.000177202 | 4 |
| GO:0032102 | negative regulation of response to external stimulus                          | 7/78 | 0.000198296 | 7 |
| GO:0050680 | negative regulation of epithelial cell proliferation                          | 5/78 | 0.000202261 | 5 |
| GO:0045931 | positive regulation of mitotic cell cycle                                     | 5/78 | 0.00022808  | 5 |
| GO:0000083 | regulation of transcription involved in G1/S transition of mitotic cell cycle | 3/78 | 0.000265754 | 3 |
| GO:0042176 | regulation of protein catabolic process                                       | 8/78 | 0.000274903 | 8 |
| GO:0007062 | sister chromatid cohesion                                                     | 5/78 | 0.000287176 | 5 |
| GO:0061041 | regulation of wound healing                                                   | 5/78 | 0.000287176 | 5 |
| GO:0030326 | embryonic limb morphogenesis                                                  | 5/78 | 0.000309249 | 5 |
| GO:0035113 | embryonic appendage morphogenesis                                             | 5/78 | 0.000309249 | 5 |
| GO:0061351 | neural precursor cell                                                         | 5/78 | 0.000320757 | 5 |
| GO:0010837 | regulation of keratinocyte proliferation                                      | 3/78 | 0.000329761 | 3 |
| GO:0050678 | regulation of epithelial cell proliferation                                   | 7/78 | 0.000341203 | 7 |
| GO:0051640 | organelle localization                                                        | 9/78 | 0.000343962 | 9 |
| GO:0009894 | regulation of catabolic process                                               | 9/78 | 0.00048637  | 9 |
| GO:0031145 | anaphase-promoting complex-dependent catabolic process                        | 4/78 | 0.000486401 | 4 |
| GO:0045861 | negative regulation of                                                        | 7/78 | 0.000515122 | 7 |
| GO:0030261 | chromosome condensation                                                       | 3/78 | 0.000531031 | 3 |
| GO:1902806 | regulation of cell cycle G1/S phase transition                                | 5/78 | 0.000535375 | 5 |
| GO:0035107 | appendage morphogenesis                                                       | 5/78 | 0.000607488 | 5 |
| GO:0035108 | limb morphogenesis                                                            | 5/78 | 0.000607488 | 5 |
| GO:0051656 | establishment of organelle localization                                       | 8/78 | 0.000621045 | 8 |
| GO:0031572 | G2 DNA damage checkpoint                                                      | 3/78 | 0.000629372 | 3 |
| GO:0045926 | negative regulation of growth                                                 | 6/78 | 0.000661384 | 6 |
| GO:0000077 | DNA damage checkpoint                                                         | 5/78 | 0.000666182 | 5 |
| GO:0000082 | G1/S transition of mitotic cell                                               | 6/78 | 0.000676843 | 6 |
| GO:0043616 | keratinocyte proliferation                                                    | 3/78 | 0.000797501 | 3 |
| GO:0051653 | spindle localization                                                          | 3/78 | 0.000797501 | 3 |
| GO:0001523 | retinoid metabolic process                                                    | 4/78 | 0.000800879 | 4 |
| GO:0007050 | cell cycle arrest                                                             | 6/78 | 0.000828944 | 6 |

|            |                                                                                           |      |             |   |
|------------|-------------------------------------------------------------------------------------------|------|-------------|---|
| GO:0019886 | antigen processing and presentation of exogenous peptide antigen via MHC class II         | 4/78 | 0.000906869 | 4 |
| GO:0010466 | negative regulation of peptidase activity                                                 | 6/78 | 0.000944167 | 6 |
| GO:0051255 | spindle midzone assembly                                                                  | 2/78 | 0.000949041 | 2 |
| GO:0050673 | epithelial cell proliferation                                                             | 7/78 | 0.000984027 | 7 |
| GO:0030308 | negative regulation of cell division                                                      | 5/78 | 0.000997986 | 5 |
| GO:0045840 | positive regulation of mitotic nuclear division                                           | 3/78 | 0.001062553 | 3 |
| GO:0002495 | antigen processing and presentation of peptide antigen via MHC class II                   | 4/78 | 0.00106308  | 4 |
| GO:0016101 | diterpenoid metabolic process                                                             | 4/78 | 0.00106308  | 4 |
| GO:0044773 | mitotic DNA damage                                                                        | 4/78 | 0.00106308  | 4 |
| GO:0002504 | antigen processing and presentation of peptide or polysaccharide antigen via MHC class II | 4/78 | 0.001104904 | 4 |
| GO:0048736 | appendage development                                                                     | 5/78 | 0.001142033 | 5 |
| GO:0060173 | limb development                                                                          | 5/78 | 0.001142033 | 5 |
| GO:0030900 | forebrain development                                                                     | 7/78 | 0.001225903 | 7 |
| GO:0021987 | cerebral cortex development                                                               | 4/78 | 0.001237295 | 4 |
| GO:0045604 | regulation of epidermal cell differentiation                                              | 3/78 | 0.001377494 | 3 |
| GO:0071156 | regulation of cell cycle arrest                                                           | 4/78 | 0.00138042  | 4 |
| GO:0021681 | cerebellar granular layer development                                                     | 2/78 | 0.001383503 | 2 |
| GO:0030330 | DNA damage response, signal transduction by p53 class member                              | 4/78 | 0.001482022 | 4 |
| GO:0006721 | terpenoid metabolic process                                                               | 4/78 | 0.001534729 | 4 |
| GO:0010839 | negative regulation of keratinocyte proliferation                                         | 2/78 | 0.001630096 | 2 |
| GO:0032486 | Rap protein signal transduction                                                           | 2/78 | 0.001630096 | 2 |
| GO:0034501 | protein localization to nucleus                                                           | 2/78 | 0.001630096 | 2 |
| GO:0036445 | neuronal stem cell division                                                               | 2/78 | 0.001630096 | 2 |
| GO:0055057 | neuroblast division                                                                       | 2/78 | 0.001630096 | 2 |
| GO:0043161 | proteasome-mediated ubiquitin-dependent protein catabolic process                         | 7/78 | 0.001739321 | 7 |
| GO:0016202 | regulation of striated muscle tissue development                                          | 4/78 | 0.001817989 | 4 |
| GO:0048634 | regulation of muscle organ development                                                    | 4/78 | 0.001940807 | 4 |
| GO:0007405 | neuroblast proliferation                                                                  | 3/78 | 0.001950464 | 3 |
| GO:0051785 | positive regulation of nuclear division                                                   | 3/78 | 0.001950464 | 3 |

|            |                                                                                        |      |             |   |
|------------|----------------------------------------------------------------------------------------|------|-------------|---|
| GO:0001933 | negative regulation of protein phosphorylation                                         | 7/78 | 0.001962744 | 7 |
| GO:1901861 | regulation of muscle tissue development                                                | 4/78 | 0.002004321 | 4 |
| GO:0001558 | regulation of cell growth                                                              | 7/78 | 0.002052049 | 7 |
| GO:0052547 | regulation of peptidase activity                                                       | 7/78 | 0.002175997 | 7 |
| GO:0007096 | regulation of exit from mitosis                                                        | 2/78 | 0.002181093 | 2 |
| GO:0051782 | negative regulation of cell                                                            | 2/78 | 0.002181093 | 2 |
| GO:0044708 | single-organism behavior                                                               | 7/78 | 0.002207872 | 7 |
| GO:0006260 | DNA replication                                                                        | 6/78 | 0.00224841  | 6 |
| GO:0042770 | signal transduction in response to DNA damage                                          | 4/78 | 0.002343594 | 4 |
| GO:0007095 | mitotic G2 DNA damage checkpoint                                                       | 2/78 | 0.002485134 | 2 |
| GO:0071459 | protein localization to chromosome, centromeric                                        | 2/78 | 0.002485134 | 2 |
| GO:0090092 | regulation of transmembrane receptor protein serine/threonine kinase signaling pathway | 5/78 | 0.002619331 | 5 |
| GO:1901989 | positive regulation of cell cycle phase transition                                     | 3/78 | 0.002652896 | 3 |
| GO:0010498 | proteasomal protein catabolic process                                                  | 7/78 | 0.002730853 | 7 |
| GO:0006977 | DNA damage response, signal transduction by p53 class mediator resulting in cell cycle | 3/78 | 0.002783196 | 3 |
| GO:0055024 | regulation of cardiac muscle tissue development                                        | 3/78 | 0.002783196 | 3 |
| GO:0000920 | cell separation after cytokinesis                                                      | 2/78 | 0.002807966 | 2 |
| GO:0048670 | regulation of collateral                                                               | 2/78 | 0.002807966 | 2 |
| GO:0072431 | signal transduction involved in mitotic G1 DNA damage checkpoint                       | 3/78 | 0.00291738  | 3 |
| GO:1902400 | intracellular signal transduction involved in G1 DNA damage checkpoint                 | 3/78 | 0.00291738  | 3 |
| GO:0006720 | isoprenoid metabolic process                                                           | 4/78 | 0.003050526 | 4 |
| GO:0072413 | signal transduction involved in mitotic cell cycle checkpoint                          | 3/78 | 0.003055486 | 3 |
| GO:1902402 | signal transduction involved in mitotic DNA damage                                     | 3/78 | 0.003055486 | 3 |
| GO:1902403 | signal transduction involved in mitotic DNA integrity                                  | 3/78 | 0.003055486 | 3 |
| GO:0008356 | asymmetric cell division                                                               | 2/78 | 0.003149409 | 2 |
| GO:0042326 | negative regulation of phosphorylation                                                 | 7/78 | 0.003214064 | 7 |

| GO:0072401                 | signal transduction involved in DNA integrity checkpoint                                | 3/78      | 0.003343613 | 3     |
|----------------------------|-----------------------------------------------------------------------------------------|-----------|-------------|-------|
| GO:0072422                 | signal transduction involved in DNA damage checkpoint                                   | 3/78      | 0.003343613 | 3     |
| GO:2000045                 | regulation of G1/S transition of mitotic cell cycle                                     | 4/78      | 0.003406919 | 4     |
| GO:0032465                 | regulation of cytokinesis                                                               | 3/78      | 0.003493704 | 3     |
| GO:0034103                 | regulation of tissue remodeling                                                         | 3/78      | 0.003493704 | 3     |
| GO:0045682                 | regulation of epidermis development                                                     | 3/78      | 0.003493704 | 3     |
| GO:0072395                 | signal transduction involved in cell cycle checkpoint                                   | 3/78      | 0.003493704 | 3     |
| GO:0009896                 | positive regulation of catabolic process                                                | 6/78      | 0.003848206 | 6     |
| GO:0055026                 | negative regulation of cardiac muscle tissue development                                | 2/78      | 0.003887425 | 2     |
| GO:0031571                 | mitotic G1 DNA damage checkpoint                                                        | 3/78      | 0.004135062 | 3     |
| GO:0044819                 | mitotic G1/S transition                                                                 | 3/78      | 0.004135062 | 3     |
| GO:0048103                 | somatic stem cell division                                                              | 2/78      | 0.004283648 | 2     |
| GO:0033555                 | multicellular organismal response to stress                                             | 3/78      | 0.004305813 | 3     |
| GO:0044783                 | G1 DNA damage checkpoint                                                                | 3/78      | 0.004305813 | 3     |
| GO:0048771                 | tissue remodeling                                                                       | 4/78      | 0.004419813 | 4     |
| GO:0051436                 | negative regulation of ubiquitin-protein ligase activity involved in mitotic cell cycle | 3/78      | 0.004480792 | 3     |
| GO:0010951                 | negative regulation of endopeptidase activity                                           | 5/78      | 0.004545082 | 5     |
| GO:0051439                 | regulation of ubiquitin-protein ligase activity involved in mitotic cell cycle          | 3/78      | 0.00466003  | 3     |
| GO:0044818                 | mitotic G2/M transition                                                                 | 2/78      | 0.004697783 | 2     |
| GO:0048668                 | collateral sprouting                                                                    | 2/78      | 0.004697783 | 2     |
| <b>GO_MF_up_sig_gene</b>   |                                                                                         |           |             |       |
| ID                         | Description                                                                             | GeneRatio | pvalue      | Count |
| GO:0008017                 | microtubule binding                                                                     | 10/78     | 7.09E-08    | 10    |
| GO:0015631                 | tubulin binding                                                                         | 11/78     | 1.17E-07    | 11    |
| GO:0003777                 | microtubule motor activity                                                              | 4/78      | 0.00050282  | 4     |
| GO:0048487                 | beta-tubulin binding                                                                    | 3/78      | 0.00056597  | 3     |
| <b>GO_BP_down_sig_gene</b> |                                                                                         |           |             |       |
| ID                         | Description                                                                             | GeneRatio | pvalue      | Count |
| GO:0016054                 | organic acid catabolic process                                                          | 76/541    | 1.87E-57    | 76    |
| GO:0044282                 | small molecule catabolic                                                                | 87/541    | 2.78E-54    | 87    |
| GO:0046395                 | carboxylic acid catabolic                                                               | 65/541    | 4.04E-48    | 65    |



|            |                                               |        |          |    |
|------------|-----------------------------------------------|--------|----------|----|
| GO:1901565 | organonitrogen compound catabolic process     | 73/541 | 2.05E-38 | 73 |
| GO:1901605 | alpha-amino acid metabolic                    | 53/541 | 1.06E-34 | 53 |
| GO:0044283 | small molecule biosynthetic                   | 76/541 | 2.10E-31 | 76 |
| GO:0009063 | cellular amino acid catabolic process         | 35/541 | 6.73E-31 | 35 |
| GO:1901606 | alpha-amino acid catabolic                    | 33/541 | 3.02E-30 | 33 |
| GO:0008202 | steroid metabolic process                     | 55/541 | 3.12E-28 | 55 |
| GO:0016053 | organic acid biosynthetic                     | 54/541 | 9.81E-28 | 54 |
| GO:0006631 | fatty acid metabolic process                  | 61/541 | 4.09E-27 | 61 |
| GO:0006520 | cellular amino acid metabolic process         | 54/541 | 4.85E-26 | 54 |
| GO:0046394 | carboxylic acid biosynthetic process          | 50/541 | 2.47E-25 | 50 |
| GO:0072329 | monocarboxylic acid catabolic process         | 32/541 | 1.31E-22 | 32 |
| GO:0019373 | epoxygenase P450 pathway                      | 16/541 | 1.75E-22 | 16 |
| GO:0072376 | protein activation cascade                    | 31/541 | 3.28E-21 | 31 |
| GO:0016042 | lipid catabolic process                       | 46/541 | 2.68E-19 | 46 |
| GO:0017144 | drug metabolic process                        | 18/541 | 7.96E-19 | 18 |
| GO:0008652 | cellular amino acid biosynthetic process      | 23/541 | 1.53E-18 | 23 |
| GO:0051186 | cofactor metabolic process                    | 50/541 | 6.07E-18 | 50 |
| GO:0044242 | cellular lipid catabolic process              | 34/541 | 1.04E-16 | 34 |
| GO:0010035 | response to inorganic substance               | 54/541 | 1.17E-16 | 54 |
| GO:0042493 | response to drug                              | 50/541 | 1.48E-16 | 50 |
| GO:0006805 | xenobiotic metabolic process                  | 25/541 | 2.34E-16 | 25 |
| GO:0019395 | fatty acid oxidation                          | 25/541 | 4.00E-16 | 25 |
| GO:1901615 | organic hydroxy compound metabolic process    | 50/541 | 5.06E-16 | 50 |
| GO:0001676 | long-chain fatty acid metabolic process       | 24/541 | 5.08E-16 | 24 |
| GO:0034440 | lipid oxidation                               | 25/541 | 6.77E-16 | 25 |
| GO:0071466 | cellular response to xenobiotic stimulus      | 25/541 | 6.77E-16 | 25 |
| GO:0006732 | coenzyme metabolic process                    | 42/541 | 9.20E-16 | 42 |
| GO:0002526 | acute inflammatory response                   | 28/541 | 1.59E-15 | 28 |
| GO:0043648 | dicarboxylic acid metabolic                   | 23/541 | 1.92E-15 | 23 |
| GO:0009410 | response to xenobiotic stimulus               | 25/541 | 4.86E-15 | 25 |
| GO:0010038 | response to metal ion                         | 40/541 | 1.93E-14 | 40 |
| GO:0006956 | complement activation                         | 22/541 | 2.18E-14 | 22 |
| GO:0009064 | glutamine family amino acid metabolic process | 20/541 | 4.24E-14 | 20 |
| GO:0009074 | aromatic amino acid family catabolic process  | 11/541 | 4.61E-14 | 11 |
| GO:0006635 | fatty acid beta-oxidation                     | 20/541 | 5.73E-14 | 20 |

|            |                                                        |        |          |    |
|------------|--------------------------------------------------------|--------|----------|----|
| GO:0009062 | fatty acid catabolic process                           | 22/541 | 6.15E-14 | 22 |
| GO:0055088 | lipid homeostasis                                      | 25/541 | 1.49E-13 | 25 |
| GO:0030258 | lipid modification                                     | 36/541 | 2.20E-13 | 36 |
| GO:0006869 | lipid transport                                        | 39/541 | 5.23E-13 | 39 |
| GO:0030195 | negative regulation of blood coagulation               | 16/541 | 7.20E-13 | 16 |
| GO:1900047 | negative regulation of                                 | 16/541 | 7.20E-13 | 16 |
| GO:0010876 | lipid localization                                     | 41/541 | 7.65E-13 | 41 |
| GO:0009066 | aspartate family amino acid metabolic process          | 17/541 | 8.33E-13 | 17 |
| GO:0019369 | arachidonic acid metabolic                             | 16/541 | 1.05E-12 | 16 |
| GO:0030193 | regulation of blood coagulation                        | 20/541 | 1.84E-12 | 20 |
| GO:1900046 | regulation of hemostasis                               | 20/541 | 1.84E-12 | 20 |
| GO:0050819 | negative regulation of                                 | 16/541 | 2.15E-12 | 16 |
| GO:0009072 | aromatic amino acid family metabolic process           | 12/541 | 2.29E-12 | 12 |
| GO:0042737 | drug catabolic process                                 | 10/541 | 3.10E-12 | 10 |
| GO:0015711 | organic anion transport                                | 38/541 | 3.49E-12 | 38 |
| GO:0061045 | negative regulation of wound healing                   | 17/541 | 4.06E-12 | 17 |
| GO:0050818 | regulation of coagulation                              | 20/541 | 4.67E-12 | 20 |
| GO:0006066 | alcohol metabolic process                              | 35/541 | 9.46E-12 | 35 |
| GO:0042730 | fibrinolysis                                           | 12/541 | 1.35E-11 | 12 |
| GO:0006790 | sulfur compound metabolic                              | 39/541 | 2.71E-11 | 39 |
| GO:1903035 | negative regulation of response to wounding            | 17/541 | 3.71E-11 | 17 |
| GO:0006690 | icosanoid metabolic process                            | 20/541 | 3.85E-11 | 20 |
| GO:0010043 | response to zinc ion                                   | 15/541 | 5.69E-11 | 15 |
| GO:0061041 | regulation of wound healing                            | 22/541 | 7.39E-11 | 22 |
| GO:0033559 | unsaturated fatty acid metabolic process               | 21/541 | 8.07E-11 | 21 |
| GO:0033539 | fatty acid beta-oxidation using acyl-CoA dehydrogenase | 10/541 | 8.47E-11 | 10 |
| GO:0046942 | carboxylic acid transport                              | 32/541 | 1.03E-10 | 32 |
| GO:2000257 | regulation of protein activation cascade               | 12/541 | 1.51E-10 | 12 |
| GO:0006953 | acute-phase response                                   | 14/541 | 1.55E-10 | 14 |
| GO:1901607 | alpha-amino acid biosynthetic process                  | 16/541 | 1.81E-10 | 16 |
| GO:0072378 | blood coagulation, fibrin clot formation               | 11/541 | 1.89E-10 | 11 |
| GO:0034754 | cellular hormone metabolic                             | 20/541 | 2.05E-10 | 20 |
| GO:0009991 | response to extracellular                              | 41/541 | 3.31E-10 | 41 |
| GO:0051604 | protein maturation                                     | 31/541 | 4.11E-10 | 31 |
| GO:0042738 | exogenous drug catabolic                               | 8/541  | 5.16E-10 | 8  |
| GO:0016485 | protein processing                                     | 29/541 | 5.51E-10 | 29 |

|            |                                                |        |          |    |
|------------|------------------------------------------------|--------|----------|----|
| GO:0044262 | cellular carbohydrate metabolic process        | 30/541 | 6.14E-10 | 30 |
| GO:1903317 | regulation of protein maturation               | 17/541 | 7.17E-10 | 17 |
| GO:0006641 | triglyceride metabolic process                 | 19/541 | 7.37E-10 | 19 |
| GO:0072330 | monocarboxylic acid biosynthetic process       | 25/541 | 8.67E-10 | 25 |
| GO:0006820 | anion transport                                | 42/541 | 1.04E-09 | 42 |
| GO:0006536 | glutamate metabolic process                    | 11/541 | 1.19E-09 | 11 |
| GO:0015850 | organic hydroxy compound transport             | 26/541 | 1.22E-09 | 26 |
| GO:0006639 | acylglycerol metabolic process                 | 20/541 | 1.26E-09 | 20 |
| GO:1903034 | regulation of response to                      | 22/541 | 1.26E-09 | 22 |
| GO:0002576 | platelet degranulation                         | 19/541 | 1.44E-09 | 19 |
| GO:0006638 | neutral lipid metabolic process                | 20/541 | 1.46E-09 | 20 |
| GO:0030449 | regulation of complement                       | 11/541 | 1.78E-09 | 11 |
| GO:0006959 | humoral immune response                        | 26/541 | 1.90E-09 | 26 |
| GO:0016125 | sterol metabolic process                       | 21/541 | 2.45E-09 | 21 |
| GO:0007597 | blood coagulation, intrinsic                   | 9/541  | 2.58E-09 | 9  |
| GO:0051917 | regulation of fibrinolysis                     | 8/541  | 2.95E-09 | 8  |
| GO:1990267 | response to transition metal nanoparticle      | 20/541 | 3.08E-09 | 20 |
| GO:0009065 | glutamine family amino acid catabolic process  | 10/541 | 3.96E-09 | 10 |
| GO:0044723 | single-organism carbohydrate metabolic process | 40/541 | 4.08E-09 | 40 |
| GO:1902652 | secondary alcohol metabolic process            | 20/541 | 4.11E-09 | 20 |
| GO:0042445 | hormone metabolic process                      | 24/541 | 4.34E-09 | 24 |
| GO:0006090 | pyruvate metabolic process                     | 18/541 | 4.34E-09 | 18 |
| GO:0009068 | aspartate family amino acid catabolic process  | 9/541  | 4.56E-09 | 9  |
| GO:0070613 | regulation of protein processing               | 16/541 | 4.79E-09 | 16 |
| GO:0015849 | organic acid transport                         | 21/541 | 4.81E-09 | 21 |
| GO:0010817 | regulation of hormone levels                   | 41/541 | 4.93E-09 | 41 |
| GO:0002673 | regulation of acute inflammatory response      | 15/541 | 5.34E-09 | 15 |
| GO:0006006 | glucose metabolic process                      | 25/541 | 5.79E-09 | 25 |
| GO:0019216 | regulation of lipid metabolic                  | 30/541 | 6.03E-09 | 30 |
| GO:0008206 | bile acid metabolic process                    | 12/541 | 7.40E-09 | 12 |
| GO:0006721 | terpenoid metabolic process                    | 18/541 | 8.20E-09 | 18 |
| GO:0009636 | response to toxic substance                    | 25/541 | 9.70E-09 | 25 |
| GO:0008203 | cholesterol metabolic process                  | 19/541 | 1.21E-08 | 19 |
| GO:0007596 | blood coagulation                              | 34/541 | 1.27E-08 | 34 |
| GO:0050817 | coagulation                                    | 34/541 | 1.68E-08 | 34 |
| GO:0015718 | monocarboxylic acid transport                  | 20/541 | 1.80E-08 | 20 |
| GO:0007599 | hemostasis                                     | 34/541 | 1.80E-08 | 34 |

|            |                                                                |        |          |    |
|------------|----------------------------------------------------------------|--------|----------|----|
| GO:0006694 | steroid biosynthetic process                                   | 21/541 | 1.91E-08 | 21 |
| GO:0042402 | cellular biogenic amine catabolic process                      | 9/541  | 2.03E-08 | 9  |
| GO:0006568 | tryptophan metabolic process                                   | 7/541  | 2.51E-08 | 7  |
| GO:0006720 | isoprenoid metabolic process                                   | 19/541 | 3.10E-08 | 19 |
| GO:0009310 | amine catabolic process                                        | 9/541  | 3.16E-08 | 9  |
| GO:0042180 | cellular ketone metabolic                                      | 25/541 | 3.43E-08 | 25 |
| GO:0071248 | cellular response to metal ion                                 | 19/541 | 3.53E-08 | 19 |
| GO:0050878 | regulation of body fluid levels                                | 41/541 | 3.95E-08 | 41 |
| GO:0002920 | regulation of humoral immune response                          | 12/541 | 4.76E-08 | 12 |
| GO:0019318 | hexose metabolic process                                       | 26/541 | 5.08E-08 | 26 |
| GO:0055090 | acylglycerol homeostasis                                       | 10/541 | 5.63E-08 | 10 |
| GO:0070328 | triglyceride homeostasis                                       | 10/541 | 5.63E-08 | 10 |
| GO:0031667 | response to nutrient levels                                    | 35/541 | 5.73E-08 | 35 |
| GO:0008015 | blood circulation                                              | 40/541 | 6.18E-08 | 40 |
| GO:0002455 | humoral immune response mediated by circulating immunoglobulin | 14/541 | 6.43E-08 | 14 |
| GO:0006958 | complement activation, classical pathway                       | 13/541 | 7.42E-08 | 13 |
| GO:0003013 | circulatory system process                                     | 40/541 | 7.72E-08 | 40 |
| GO:0045834 | positive regulation of lipid metabolic process                 | 18/541 | 7.86E-08 | 18 |
| GO:0009069 | serine family amino acid metabolic process                     | 11/541 | 8.51E-08 | 11 |
| GO:0008217 | regulation of blood pressure                                   | 21/541 | 9.15E-08 | 21 |
| GO:0051384 | response to glucocorticoid                                     | 19/541 | 9.47E-08 | 19 |
| GO:0008209 | androgen metabolic process                                     | 9/541  | 1.04E-07 | 9  |
| GO:0005996 | monosaccharide metabolic                                       | 26/541 | 1.39E-07 | 26 |
| GO:0043650 | dicarboxylic acid biosynthetic process                         | 7/541  | 1.87E-07 | 7  |
| GO:0031638 | zymogen activation                                             | 10/541 | 1.88E-07 | 10 |
| GO:0072524 | pyridine-containing compound metabolic process                 | 18/541 | 2.11E-07 | 18 |
| GO:0006898 | receptor-mediated endocytosis                                  | 28/541 | 2.11E-07 | 28 |
| GO:0006569 | tryptophan catabolic process                                   | 6/541  | 2.13E-07 | 6  |
| GO:0042436 | indole-containing compound catabolic process                   | 6/541  | 2.13E-07 | 6  |
| GO:0046218 | indolalkylamine catabolic                                      | 6/541  | 2.13E-07 | 6  |
| GO:0046950 | cellular ketone body metabolic process                         | 6/541  | 2.13E-07 | 6  |
| GO:1902224 | ketone body metabolic process                                  | 6/541  | 2.13E-07 | 6  |
| GO:0006094 | gluconeogenesis                                                | 14/541 | 2.17E-07 | 14 |
| GO:0006576 | cellular biogenic amine metabolic process                      | 11/541 | 2.89E-07 | 11 |

|            |                                                   |        |          |    |
|------------|---------------------------------------------------|--------|----------|----|
| GO:0046686 | response to cadmium ion                           | 10/541 | 3.24E-07 | 10 |
| GO:0051591 | response to cAMP                                  | 15/541 | 3.36E-07 | 15 |
| GO:0019319 | hexose biosynthetic process                       | 14/541 | 3.51E-07 | 14 |
| GO:0071241 | cellular response to inorganic substance          | 19/541 | 3.63E-07 | 19 |
| GO:0006558 | L-phenylalanine metabolic                         | 6/541  | 4.57E-07 | 6  |
| GO:0006559 | L-phenylalanine catabolic                         | 6/541  | 4.57E-07 | 6  |
| GO:0034370 | triglyceride-rich lipoprotein particle remodeling | 6/541  | 4.57E-07 | 6  |
| GO:0034372 | very-low-density lipoprotein particle remodeling  | 6/541  | 4.57E-07 | 6  |
| GO:0019362 | pyridine nucleotide metabolic process             | 17/541 | 4.71E-07 | 17 |
| GO:0046496 | nicotinamide nucleotide metabolic process         | 17/541 | 4.71E-07 | 17 |
| GO:0032496 | response to lipopolysaccharide                    | 28/541 | 4.91E-07 | 28 |
| GO:0031960 | response to corticosteroid                        | 19/541 | 4.97E-07 | 19 |
| GO:0006555 | methionine metabolic process                      | 7/541  | 5.34E-07 | 7  |
| GO:0006586 | indolalkylamine metabolic                         | 7/541  | 5.34E-07 | 7  |
| GO:0043691 | reverse cholesterol transport                     | 7/541  | 5.34E-07 | 7  |
| GO:0034367 | macromolecular complex remodeling                 | 8/541  | 5.43E-07 | 8  |
| GO:0034368 | protein-lipid complex                             | 8/541  | 5.43E-07 | 8  |
| GO:0034369 | plasma lipoprotein particle remodeling            | 8/541  | 5.43E-07 | 8  |
| GO:1901361 | organic cyclic compound catabolic process         | 35/541 | 5.72E-07 | 35 |
| GO:0046364 | monosaccharide biosynthetic process               | 14/541 | 6.43E-07 | 14 |
| GO:0042430 | indole-containing compound metabolic process      | 8/541  | 7.75E-07 | 8  |
| GO:0071294 | cellular response to zinc ion                     | 7/541  | 8.50E-07 | 7  |
| GO:0006069 | ethanol oxidation                                 | 6/541  | 8.88E-07 | 6  |
| GO:0014074 | response to purine-containing compound            | 18/541 | 8.93E-07 | 18 |
| GO:0071827 | plasma lipoprotein particle organization          | 9/541  | 9.48E-07 | 9  |
| GO:0002237 | response to molecule of bacterial origin          | 28/541 | 1.16E-06 | 28 |
| GO:0006525 | arginine metabolic process                        | 7/541  | 1.31E-06 | 7  |
| GO:0031639 | plasminogen activation                            | 7/541  | 1.31E-06 | 7  |
| GO:0006637 | acyl-CoA metabolic process                        | 14/541 | 1.49E-06 | 14 |
| GO:0035383 | thioester metabolic process                       | 14/541 | 1.49E-06 | 14 |
| GO:0015721 | bile acid and bile salt transport                 | 8/541  | 1.50E-06 | 8  |
| GO:0071825 | protein-lipid complex subunit organization        | 9/541  | 1.61E-06 | 9  |

|            |                                                          |        |          |    |
|------------|----------------------------------------------------------|--------|----------|----|
| GO:0072593 | reactive oxygen species<br>metabolic process             | 23/541 | 1.66E-06 | 23 |
| GO:0001101 | response to acid chemical                                | 25/541 | 1.75E-06 | 25 |
| GO:0007584 | response to nutrient                                     | 19/541 | 1.93E-06 | 19 |
| GO:0042537 | benzene-containing compound<br>metabolic process         | 7/541  | 1.96E-06 | 7  |
| GO:0006733 | oxidoreduction coenzyme<br>metabolic process             | 17/541 | 1.98E-06 | 17 |
| GO:0000096 | sulfur amino acid metabolic                              | 8/541  | 2.04E-06 | 8  |
| GO:0006699 | bile acid biosynthetic process                           | 8/541  | 2.04E-06 | 8  |
| GO:0046487 | glyoxylate metabolic process                             | 8/541  | 2.04E-06 | 8  |
| GO:0010675 | regulation of cellular<br>carbohydrate metabolic process | 16/541 | 2.32E-06 | 16 |
| GO:0009108 | coenzyme biosynthetic process                            | 17/541 | 2.42E-06 | 17 |
| GO:0006067 | ethanol metabolic process                                | 6/541  | 2.73E-06 | 6  |
| GO:0006957 | complement activation,<br>alternative pathway            | 6/541  | 2.73E-06 | 6  |
| GO:0019627 | urea metabolic process                                   | 6/541  | 2.73E-06 | 6  |
| GO:0050667 | homocysteine metabolic process                           | 6/541  | 2.73E-06 | 6  |
| GO:0010906 | regulation of glucose metabolic<br>process               | 14/541 | 3.24E-06 | 14 |
| GO:0010466 | negative regulation of peptidase<br>activity             | 23/541 | 4.25E-06 | 23 |
| GO:0051289 | protein homotetramerization                              | 11/541 | 4.30E-06 | 11 |
| GO:0046683 | response to organophosphorus                             | 16/541 | 4.37E-06 | 16 |
| GO:0034375 | high-density lipoprotein particle<br>remodeling          | 6/541  | 4.43E-06 | 6  |
| GO:0071276 | cellular response to cadmium                             | 6/541  | 4.43E-06 | 6  |
| GO:0051188 | cofactor biosynthetic process                            | 19/541 | 5.02E-06 | 19 |
| GO:0006109 | regulation of carbohydrate<br>metabolic process          | 17/541 | 5.27E-06 | 17 |
| GO:0045861 | negative regulation of                                   | 26/541 | 5.95E-06 | 26 |
| GO:1901616 | organic hydroxy compound<br>catabolic process            | 10/541 | 6.61E-06 | 10 |
| GO:0010951 | negative regulation of<br>endopeptidase activity         | 22/541 | 6.63E-06 | 22 |
| GO:0071941 | nitrogen cycle metabolic                                 | 6/541  | 6.89E-06 | 6  |
| GO:0060191 | regulation of lipase activity                            | 12/541 | 7.45E-06 | 12 |
| GO:0051918 | negative regulation of                                   | 5/541  | 7.78E-06 | 5  |
| GO:0070189 | kynurenine metabolic process                             | 5/541  | 7.78E-06 | 5  |
| GO:0044272 | sulfur compound biosynthetic<br>process                  | 20/541 | 9.03E-06 | 20 |
| GO:0006084 | acetyl-CoA metabolic process                             | 8/541  | 1.01E-05 | 8  |
| GO:0042304 | regulation of fatty acid<br>biosynthetic process         | 8/541  | 1.01E-05 | 8  |
| GO:0006071 | glycerol metabolic process                               | 6/541  | 1.04E-05 | 6  |

|            |                                                      |        |          |    |
|------------|------------------------------------------------------|--------|----------|----|
| GO:0009070 | serine family amino acid biosynthetic process        | 6/541  | 1.04E-05 | 6  |
| GO:0030194 | positive regulation of blood coagulation             | 7/541  | 1.05E-05 | 7  |
| GO:1900048 | positive regulation of                               | 7/541  | 1.05E-05 | 7  |
| GO:0003018 | vascular process in circulatory system               | 17/541 | 1.18E-05 | 17 |
| GO:0050727 | regulation of inflammatory response                  | 25/541 | 1.25E-05 | 25 |
| GO:0016051 | carbohydrate biosynthetic                            | 19/541 | 1.30E-05 | 19 |
| GO:0019748 | secondary metabolic process                          | 10/541 | 1.30E-05 | 10 |
| GO:0016101 | diterpenoid metabolic process                        | 13/541 | 1.32E-05 | 13 |
| GO:0017187 | peptidyl-glutamic acid                               | 5/541  | 1.39E-05 | 5  |
| GO:0018214 | protein carboxylation                                | 5/541  | 1.39E-05 | 5  |
| GO:0050820 | positive regulation of                               | 7/541  | 1.40E-05 | 7  |
| GO:0046890 | regulation of lipid biosynthetic process             | 15/541 | 1.43E-05 | 15 |
| GO:0006103 | 2-oxoglutarate metabolic                             | 6/541  | 1.51E-05 | 6  |
| GO:0031100 | animal organ regeneration                            | 11/541 | 1.67E-05 | 11 |
| GO:0016064 | immunoglobulin mediated immune response              | 15/541 | 1.90E-05 | 15 |
| GO:0030301 | cholesterol transport                                | 11/541 | 2.18E-05 | 11 |
| GO:0019724 | B cell mediated immunity                             | 15/541 | 2.29E-05 | 15 |
| GO:0000050 | urea cycle                                           | 5/541  | 2.32E-05 | 5  |
| GO:0006107 | oxaloacetate metabolic process                       | 5/541  | 2.32E-05 | 5  |
| GO:0032371 | regulation of sterol transport                       | 8/541  | 2.42E-05 | 8  |
| GO:0032374 | regulation of cholesterol                            | 8/541  | 2.42E-05 | 8  |
| GO:0015918 | sterol transport                                     | 11/541 | 2.49E-05 | 11 |
| GO:0050880 | regulation of blood vessel size                      | 15/541 | 2.51E-05 | 15 |
| GO:0035150 | regulation of tube size                              | 15/541 | 2.74E-05 | 15 |
| GO:0001523 | retinoid metabolic process                           | 12/541 | 2.94E-05 | 12 |
| GO:0009084 | glutamine family amino acid biosynthetic process     | 6/541  | 2.98E-05 | 6  |
| GO:0019400 | alditol metabolic process                            | 6/541  | 2.98E-05 | 6  |
| GO:0000038 | very long-chain fatty acid metabolic process         | 7/541  | 3.05E-05 | 7  |
| GO:0045471 | response to ethanol                                  | 14/541 | 3.15E-05 | 14 |
| GO:0032102 | negative regulation of response to external stimulus | 22/541 | 3.52E-05 | 22 |
| GO:0051346 | negative regulation of hydrolase activity            | 29/541 | 3.73E-05 | 29 |
| GO:0018200 | peptidyl-glutamic acid                               | 7/541  | 3.87E-05 | 7  |
| GO:0019835 | cytolysis                                            | 7/541  | 3.87E-05 | 7  |
| GO:0050673 | epithelial cell proliferation                        | 26/541 | 4.06E-05 | 26 |
| GO:0006706 | steroid catabolic process                            | 6/541  | 4.06E-05 | 6  |

|            |                                                  |        |             |    |
|------------|--------------------------------------------------|--------|-------------|----|
| GO:0009067 | aspartate family amino acid biosynthetic process | 6/541  | 4.06E-05    | 6  |
| GO:0000302 | response to reactive oxygen species              | 19/541 | 4.07E-05    | 19 |
| GO:0032368 | regulation of lipid transport                    | 12/541 | 4.12E-05    | 12 |
| GO:0019217 | regulation of fatty acid metabolic process       | 11/541 | 4.12E-05    | 11 |
| GO:0001889 | liver development                                | 14/541 | 4.16E-05    | 14 |
| GO:0009308 | amine metabolic process                          | 14/541 | 4.99E-05    | 14 |
| GO:0009081 | branched-chain amino acid metabolic process      | 6/541  | 5.44E-05    | 6  |
| GO:0061008 | hepaticobiliary system                           | 14/541 | 5.46E-05    | 14 |
| GO:0006096 | glycolytic process                               | 10/541 | 5.60E-05    | 10 |
| GO:0052548 | regulation of endopeptidase                      | 27/541 | 5.75E-05    | 27 |
| GO:0038066 | p38MAPK cascade                                  | 7/541  | 6.05E-05    | 7  |
| GO:0006757 | ATP generation from ADP                          | 10/541 | 6.38E-05    | 10 |
| GO:0019439 | aromatic compound catabolic process              | 29/541 | 6.39E-05    | 29 |
| GO:0052547 | regulation of peptidase activity                 | 28/541 | 6.52E-05    | 28 |
| GO:0007568 | aging                                            | 22/541 | 6.62E-05    | 22 |
| GO:1901654 | response to ketone                               | 16/541 | 7.12E-05    | 16 |
| GO:0042632 | cholesterol homeostasis                          | 10/541 | 7.24E-05    | 10 |
| GO:0055092 | sterol homeostasis                               | 10/541 | 7.24E-05    | 10 |
| GO:0097006 | regulation of plasma lipoprotein particle levels | 9/541  | 7.26E-05    | 9  |
| GO:0034308 | primary alcohol metabolic                        | 8/541  | 7.38E-05    | 8  |
| GO:0046460 | neutral lipid biosynthetic                       | 8/541  | 7.38E-05    | 8  |
| GO:0046463 | acylglycerol biosynthetic                        | 8/541  | 7.38E-05    | 8  |
| GO:0019433 | triglyceride catabolic process                   | 7/541  | 7.47E-05    | 7  |
| GO:0048545 | response to steroid hormone                      | 27/541 | 7.59E-05    | 27 |
| GO:0051004 | regulation of lipoprotein lipase activity        | 5/541  | 8.10E-05    | 5  |
| GO:0070989 | oxidative demethylation                          | 5/541  | 8.10E-05    | 5  |
| GO:0003073 | regulation of systemic arterial blood pressure   | 11/541 | 8.26E-05    | 11 |
| GO:0033273 | response to vitamin                              | 11/541 | 8.26E-05    | 11 |
| GO:0051259 | protein oligomerization                          | 31/541 | 8.33E-05    | 31 |
| GO:0006766 | vitamin metabolic process                        | 14/541 | 9.13E-05    | 14 |
| GO:0045055 | regulated exocytosis                             | 22/541 | 9.17E-05    | 22 |
| GO:0019674 | NAD metabolic process                            | 9/541  | 9.63E-05    | 9  |
| GO:0006165 | nucleoside diphosphate phosphorylation           | 11/541 | 0.00010265  | 11 |
| GO:0006979 | response to oxidative stress                     | 27/541 | 0.000103938 | 27 |
| GO:0051260 | protein homooligomerization                      | 21/541 | 0.000108698 | 21 |
| GO:0042594 | response to starvation                           | 15/541 | 0.000110811 | 15 |
| GO:0001659 | temperature homeostasis                          | 7/541  | 0.00011116  | 7  |



|            |                                                                                                                           |        |             |    |
|------------|---------------------------------------------------------------------------------------------------------------------------|--------|-------------|----|
| GO:1900745 | positive regulation of p38MAPK cascade                                                                                    | 5/541  | 0.00011462  | 5  |
| GO:0015893 | drug transport                                                                                                            | 6/541  | 0.000118775 | 6  |
| GO:0090303 | positive regulation of wound                                                                                              | 8/541  | 0.00012023  | 8  |
| GO:0097305 | response to alcohol                                                                                                       | 15/541 | 0.000128644 | 15 |
| GO:0033762 | response to glucagon                                                                                                      | 8/541  | 0.000140229 | 8  |
| GO:0044724 | single-organism carbohydrate catabolic process                                                                            | 14/541 | 0.0001479   | 14 |
| GO:0019218 | regulation of steroid metabolic process                                                                                   | 10/541 | 0.000148393 | 10 |
| GO:1903825 | organic acid transmembrane transport                                                                                      | 10/541 | 0.000148393 | 10 |
| GO:0050996 | positive regulation of lipid catabolic process                                                                            | 6/541  | 0.000150204 | 6  |
| GO:1900744 | regulation of p38MAPK                                                                                                     | 6/541  | 0.000150204 | 6  |
| GO:0006577 | amino-acid betaine metabolic process                                                                                      | 5/541  | 0.000158063 | 5  |
| GO:0009112 | nucleobase metabolic process                                                                                              | 7/541  | 0.000160897 | 7  |
| GO:0060193 | positive regulation of lipase                                                                                             | 9/541  | 0.000163558 | 9  |
| GO:0046031 | ADP metabolic process                                                                                                     | 10/541 | 0.000166001 | 10 |
| GO:0097164 | ammonium ion metabolic                                                                                                    | 11/541 | 0.000171642 | 11 |
| GO:0002250 | adaptive immune response                                                                                                  | 26/541 | 0.000187886 | 26 |
| GO:0046939 | nucleotide phosphorylation                                                                                                | 11/541 | 0.000189355 | 11 |
| GO:0006544 | glycine metabolic process                                                                                                 | 5/541  | 0.000213044 | 5  |
| GO:0046461 | neutral lipid catabolic process                                                                                           | 7/541  | 0.000227258 | 7  |
| GO:0046464 | acylglycerol catabolic process                                                                                            | 7/541  | 0.000227258 | 7  |
| GO:0031099 | regeneration                                                                                                              | 15/541 | 0.000227299 | 15 |
| GO:0046320 | regulation of fatty acid                                                                                                  | 6/541  | 0.000232603 | 6  |
| GO:0050994 | regulation of lipid catabolic                                                                                             | 8/541  | 0.000249608 | 8  |
| GO:0098754 | detoxification                                                                                                            | 11/541 | 0.000252064 | 11 |
| GO:0044273 | sulfur compound catabolic                                                                                                 | 7/541  | 0.000267851 | 7  |
| GO:0006206 | pyrimidine nucleobase metabolic process                                                                                   | 5/541  | 0.00028146  | 5  |
| GO:0006855 | drug transmembrane transport                                                                                              | 5/541  | 0.00028146  | 5  |
| GO:0009083 | branched-chain amino acid catabolic process                                                                               | 5/541  | 0.00028146  | 5  |
| GO:1903036 | positive regulation of response to wounding                                                                               | 8/541  | 0.000285755 | 8  |
| GO:0016052 | carbohydrate catabolic process                                                                                            | 14/541 | 0.000288697 | 14 |
| GO:0071222 | cellular response to lipopolysaccharide                                                                                   | 14/541 | 0.000288697 | 14 |
| GO:0002460 | adaptive immune response based on somatic recombination of immune receptors built from immunoglobulin superfamily domains | 19/541 | 0.000292045 | 19 |

|            |                                                                                |        |             |    |
|------------|--------------------------------------------------------------------------------|--------|-------------|----|
| GO:0015740 | C4-dicarboxylate transport                                                     | 4/541  | 0.000301687 | 4  |
| GO:1900746 | regulation of vascular endothelial growth factor                               | 4/541  | 0.000301687 | 4  |
| GO:1901568 | fatty acid derivative metabolic process                                        | 4/541  | 0.000301687 | 4  |
| GO:0055076 | transition metal ion homeostasis                                               | 12/541 | 0.000303288 | 12 |
| GO:1903510 | mucopolysaccharide metabolic process                                           | 12/541 | 0.000303288 | 12 |
| GO:1901652 | response to peptide                                                            | 28/541 | 0.000326825 | 28 |
| GO:0045923 | positive regulation of fatty acid metabolic process                            | 6/541  | 0.000346959 | 6  |
| GO:0044106 | cellular amine metabolic                                                       | 12/541 | 0.000356964 | 12 |
| GO:0034377 | plasma lipoprotein particle assembly                                           | 5/541  | 0.00036533  | 5  |
| GO:1903319 | positive regulation of protein maturation                                      | 5/541  | 0.00036533  | 5  |
| GO:0006775 | fat-soluble vitamin metabolic process                                          | 7/541  | 0.000366481 | 7  |
| GO:0019432 | triglyceride biosynthetic process                                              | 7/541  | 0.000366481 | 7  |
| GO:0045907 | positive regulation of vasoconstriction                                        | 6/541  | 0.000418554 | 6  |
| GO:0071548 | response to dexamethasone                                                      | 6/541  | 0.000418554 | 6  |
| GO:0090207 | regulation of triglyceride metabolic process                                   | 6/541  | 0.000418554 | 6  |
| GO:0015908 | fatty acid transport                                                           | 10/541 | 0.000419535 | 10 |
| GO:0071219 | cellular response to molecule of bacterial origin                              | 14/541 | 0.000436384 | 14 |
| GO:0006554 | lysine catabolic process                                                       | 4/541  | 0.000440954 | 4  |
| GO:0007494 | midgut development                                                             | 4/541  | 0.000440954 | 4  |
| GO:0009086 | methionine biosynthetic process                                                | 4/541  | 0.000440954 | 4  |
| GO:0010896 | regulation of triglyceride catabolic process                                   | 4/541  | 0.000440954 | 4  |
| GO:0043649 | dicarboxylic acid catabolic                                                    | 4/541  | 0.000440954 | 4  |
| GO:1902547 | regulation of cellular response to vascular endothelial growth factor stimulus | 4/541  | 0.000440954 | 4  |
| GO:0043434 | response to peptide hormone                                                    | 26/541 | 0.000442166 | 26 |
| GO:0051262 | protein tetramerization                                                        | 13/541 | 0.000452085 | 13 |
| GO:0008207 | C21-steroid hormone metabolic process                                          | 6/541  | 0.000501174 | 6  |
| GO:0090218 | positive regulation of lipid kinase activity                                   | 6/541  | 0.000501174 | 6  |
| GO:1905039 | carboxylic acid transmembrane transport                                        | 9/541  | 0.000515188 | 9  |
| GO:0065005 | protein-lipid complex assembly                                                 | 5/541  | 0.000588097 | 5  |

|            |                                                                              |        |             |    |
|------------|------------------------------------------------------------------------------|--------|-------------|----|
| GO:0042558 | pteridine-containing compound metabolic process                              | 6/541  | 0.000595945 | 6  |
| GO:0006633 | fatty acid biosynthetic process                                              | 13/541 | 0.000598144 | 13 |
| GO:0010517 | regulation of phospholipase                                                  | 8/541  | 0.000603109 | 8  |
| GO:0098869 | cellular oxidant detoxification                                              | 10/541 | 0.000607456 | 10 |
| GO:0006531 | aspartate metabolic process                                                  | 4/541  | 0.000620659 | 4  |
| GO:0006553 | lysine metabolic process                                                     | 4/541  | 0.000620659 | 4  |
| GO:0033540 | fatty acid beta-oxidation using acyl-CoA oxidase                             | 4/541  | 0.000620659 | 4  |
| GO:0036109 | alpha-linolenic acid metabolic process                                       | 4/541  | 0.000620659 | 4  |
| GO:0043568 | positive regulation of insulin-like growth factor receptor signaling pathway | 4/541  | 0.000620659 | 4  |
| GO:0003044 | regulation of systemic arterial blood pressure mediated by a chemical signal | 7/541  | 0.000650146 | 7  |
| GO:0009135 | purine nucleoside diphosphate metabolic process                              | 10/541 | 0.00072475  | 10 |
| GO:0009179 | purine ribonucleoside diphosphate metabolic process                          | 10/541 | 0.00072475  | 10 |
| GO:1990748 | cellular detoxification                                                      | 10/541 | 0.00072475  | 10 |
| GO:0007586 | digestion                                                                    | 14/541 | 0.000729862 | 14 |
| GO:0043567 | regulation of insulin-like growth factor receptor signaling                  | 5/541  | 0.000731583 | 5  |
| GO:0048771 | tissue remodeling                                                            | 13/541 | 0.000732226 | 13 |
| GO:0044057 | regulation of system process                                                 | 30/541 | 0.000733735 | 30 |
| GO:0043410 | positive regulation of MAPK cascade                                          | 29/541 | 0.000768495 | 29 |
| GO:0005977 | glycogen metabolic process                                                   | 9/541  | 0.000769147 | 9  |
| GO:0030168 | platelet activation                                                          | 14/541 | 0.000776198 | 14 |
| GO:0048732 | gland development                                                            | 26/541 | 0.000804008 | 26 |
| GO:0071320 | cellular response to cAMP                                                    | 7/541  | 0.000845773 | 7  |
| GO:0006073 | cellular glucan metabolic                                                    | 9/541  | 0.000846416 | 9  |
| GO:0044042 | glucan metabolic process                                                     | 9/541  | 0.000846416 | 9  |
| GO:0009820 | alkaloid metabolic process                                                   | 4/541  | 0.000846744 | 4  |
| GO:0034433 | steroid esterification                                                       | 4/541  | 0.000846744 | 4  |
| GO:0034434 | sterol esterification                                                        | 4/541  | 0.000846744 | 4  |
| GO:0034435 | cholesterol esterification                                                   | 4/541  | 0.000846744 | 4  |
| GO:0045723 | positive regulation of fatty acid biosynthetic process                       | 4/541  | 0.000846744 | 4  |
| GO:0009185 | ribonucleoside diphosphate metabolic process                                 | 10/541 | 0.000860096 | 10 |
| GO:0043200 | response to amino acid                                                       | 10/541 | 0.000860096 | 10 |
| GO:0050678 | regulation of epithelial cell proliferation                                  | 20/541 | 0.000888601 | 20 |

|            |                                                                                 |        |             |    |
|------------|---------------------------------------------------------------------------------|--------|-------------|----|
| GO:0003071 | renal system process involved in regulation of systemic arterial blood pressure | 5/541  | 0.000899684 | 5  |
| GO:0038084 | vascular endothelial growth factor signaling pathway                            | 5/541  | 0.000899684 | 5  |
| GO:0010518 | positive regulation of phospholipase activity                                   | 7/541  | 0.000959586 | 7  |
| GO:0032370 | positive regulation of lipid                                                    | 7/541  | 0.000959586 | 7  |
| GO:0046503 | glycerolipid catabolic process                                                  | 7/541  | 0.000959586 | 7  |
| GO:0051047 | positive regulation of secretion                                                | 23/541 | 0.000964625 | 23 |
| GO:0030212 | hyaluronan metabolic process                                                    | 6/541  | 0.000965225 | 6  |
| GO:0048009 | insulin-like growth factor receptor signaling pathway                           | 6/541  | 0.000965225 | 6  |
| GO:2000377 | regulation of reactive oxygen species metabolic process                         | 13/541 | 0.001011661 | 13 |
| GO:0007588 | excretion                                                                       | 8/541  | 0.001045096 | 8  |
| GO:0014068 | positive regulation of phosphatidylinositol 3-kinase signaling                  | 8/541  | 0.001045096 | 8  |
| GO:0006465 | signal peptide processing                                                       | 5/541  | 0.001094912 | 5  |
| GO:0006000 | fructose metabolic process                                                      | 4/541  | 0.001125213 | 4  |
| GO:0032354 | response to follicle-stimulating hormone                                        | 4/541  | 0.001125213 | 4  |
| GO:0043090 | amino acid import                                                               | 4/541  | 0.001125213 | 4  |
| GO:0060192 | negative regulation of lipase                                                   | 4/541  | 0.001125213 | 4  |
| GO:0009132 | nucleoside diphosphate metabolic process                                        | 11/541 | 0.001196576 | 11 |
| GO:0006091 | generation of precursor metabolites and energy                                  | 23/541 | 0.001212331 | 23 |
| GO:0010565 | regulation of cellular ketone metabolic process                                 | 13/541 | 0.001294931 | 13 |
| GO:0035924 | cellular response to vascular endothelial growth factor                         | 6/541  | 0.001295113 | 6  |
| GO:0051193 | regulation of cofactor metabolic process                                        | 7/541  | 0.001374621 | 7  |
| GO:0051196 | regulation of coenzyme metabolic process                                        | 7/541  | 0.001374621 | 7  |
| GO:0009435 | NAD biosynthetic process                                                        | 4/541  | 0.001462078 | 4  |
| GO:0010544 | negative regulation of platelet activation                                      | 4/541  | 0.001462078 | 4  |
| GO:0030540 | female genitalia development                                                    | 4/541  | 0.001462078 | 4  |
| GO:0033189 | response to vitamin A                                                           | 4/541  | 0.001462078 | 4  |
| GO:0071216 | cellular response to biotic                                                     | 14/541 | 0.001472398 | 14 |
| GO:1901342 | regulation of vasculature development                                           | 17/541 | 0.001543296 | 17 |

|            |                                                     |        |             |    |
|------------|-----------------------------------------------------|--------|-------------|----|
| GO:0006760 | folic acid-containing compound metabolic process    | 5/541  | 0.001577109 | 5  |
| GO:1903524 | positive regulation of blood circulation            | 9/541  | 0.001581891 | 9  |
| GO:1904018 | positive regulation of vasculature development      | 12/541 | 0.001591489 | 12 |
| GO:0070542 | response to fatty acid                              | 6/541  | 0.001704813 | 6  |
| GO:0046916 | cellular transition metal ion homeostasis           | 9/541  | 0.001719539 | 9  |
| GO:0032373 | positive regulation of sterol transport             | 4/541  | 0.001863313 | 4  |
| GO:0032376 | positive regulation of cholesterol transport        | 4/541  | 0.001863313 | 4  |
| GO:0090277 | positive regulation of peptide hormone secretion    | 9/541  | 0.001866614 | 9  |
| GO:0055072 | iron ion homeostasis                                | 8/541  | 0.002062008 | 8  |
| GO:0006887 | exocytosis                                          | 24/541 | 0.002068382 | 24 |
| GO:0048806 | genitalia development                               | 6/541  | 0.002206016 | 6  |
| GO:0042326 | negative regulation of phosphorylation              | 25/541 | 0.002250667 | 25 |
| GO:0009713 | catechol-containing compound biosynthetic process   | 4/541  | 0.002334819 | 4  |
| GO:0042423 | catecholamine biosynthetic                          | 4/541  | 0.002334819 | 4  |
| GO:0006865 | amino acid transport                                | 9/541  | 0.002369015 | 9  |
| GO:0030203 | glycosaminoglycan metabolic process                 | 13/541 | 0.00243099  | 13 |
| GO:0002793 | positive regulation of peptide secretion            | 9/541  | 0.002558465 | 9  |
| GO:0006112 | energy reserve metabolic                            | 9/541  | 0.002558465 | 9  |
| GO:1901617 | organic hydroxy compound biosynthetic process       | 13/541 | 0.002565725 | 13 |
| GO:0010543 | regulation of platelet activation                   | 5/541  | 0.002569899 | 5  |
| GO:0031640 | killing of cells of other                           | 5/541  | 0.002569899 | 5  |
| GO:0044364 | disruption of cells of other                        | 5/541  | 0.002569899 | 5  |
| GO:0019229 | regulation of vasoconstriction                      | 7/541  | 0.00261474  | 7  |
| GO:0045980 | negative regulation of nucleotide metabolic process | 7/541  | 0.00261474  | 7  |
| GO:0003014 | renal system process                                | 10/541 | 0.00267916  | 10 |
| GO:0034109 | homotypic cell-cell adhesion                        | 8/541  | 0.002684581 | 8  |
| GO:0042310 | vasoconstriction                                    | 8/541  | 0.002684581 | 8  |
| GO:0002697 | regulation of immune effector process               | 20/541 | 0.002851423 | 20 |
| GO:0001935 | endothelial cell proliferation                      | 10/541 | 0.002866472 | 10 |
| GO:0010954 | positive regulation of protein processing           | 4/541  | 0.002882381 | 4  |

|            |                                                       |        |             |    |
|------------|-------------------------------------------------------|--------|-------------|----|
| GO:0019359 | nicotinamide nucleotide biosynthetic process          | 4/541  | 0.002882381 | 4  |
| GO:0019363 | pyridine nucleotide biosynthetic process              | 4/541  | 0.002882381 | 4  |
| GO:0046653 | tetrahydrofolate metabolic process                    | 4/541  | 0.002882381 | 4  |
| GO:0090208 | positive regulation of triglyceride metabolic process | 4/541  | 0.002882381 | 4  |
| GO:0070988 | demethylation                                         | 7/541  | 0.002885537 | 7  |
| GO:0046486 | glycerolipid metabolic process                        | 23/541 | 0.002920701 | 23 |
| GO:0034637 | cellular carbohydrate biosynthetic process            | 8/541  | 0.002921817 | 8  |
| GO:0045926 | negative regulation of growth                         | 16/541 | 0.002958639 | 16 |
| GO:0044264 | cellular polysaccharide metabolic process             | 9/541  | 0.002973307 | 9  |
| GO:0050714 | positive regulation of protein secretion              | 15/541 | 0.003025163 | 15 |
| GO:0046889 | positive regulation of lipid biosynthetic process     | 7/541  | 0.0031773   | 7  |
| GO:0044270 | cellular nitrogen compound catabolic process          | 24/541 | 0.003259571 | 24 |
| GO:0006875 | cellular metal ion homeostasis                        | 27/541 | 0.003355458 | 27 |
| GO:0002921 | negative regulation of humoral immune response        | 3/541  | 0.003438334 | 3  |
| GO:0006527 | arginine catabolic process                            | 3/541  | 0.003438334 | 3  |
| GO:0006560 | proline metabolic process                             | 3/541  | 0.003438334 | 3  |
| GO:0008228 | opsonization                                          | 3/541  | 0.003438334 | 3  |
| GO:0010755 | regulation of plasminogen                             | 3/541  | 0.003438334 | 3  |
| GO:0034380 | high-density lipoprotein particle assembly            | 3/541  | 0.003438334 | 3  |
| GO:0042178 | xenobiotic catabolic process                          | 3/541  | 0.003438334 | 3  |
| GO:0006110 | regulation of glycolytic process                      | 5/541  | 0.003443332 | 5  |
| GO:0010955 | negative regulation of protein processing             | 5/541  | 0.003443332 | 5  |
| GO:0050892 | intestinal absorption                                 | 5/541  | 0.003443332 | 5  |
| GO:0060421 | positive regulation of heart                          | 5/541  | 0.003443332 | 5  |
| GO:1903318 | negative regulation of protein maturation             | 5/541  | 0.003443332 | 5  |
| GO:0006027 | glycosaminoglycan catabolic process                   | 7/541  | 0.00349106  | 7  |
| GO:0015914 | phospholipid transport                                | 7/541  | 0.00349106  | 7  |
| GO:0006022 | aminoglycan metabolic process                         | 13/541 | 0.003508455 | 13 |
| GO:0070371 | ERK1 and ERK2 cascade                                 | 17/541 | 0.003513033 | 17 |
| GO:1901657 | glycosyl compound metabolic process                   | 24/541 | 0.003806062 | 24 |
| GO:0098656 | anion transmembrane transport                         | 14/541 | 0.00386723  | 14 |

|            |                                                     |        |             |    |
|------------|-----------------------------------------------------|--------|-------------|----|
| GO:1903532 | positive regulation of secretion by cell            | 20/541 | 0.003937307 | 20 |
| GO:0051180 | vitamin transport                                   | 5/541  | 0.003951794 | 5  |
| GO:0060416 | response to growth hormone                          | 5/541  | 0.003951794 | 5  |
| GO:0046887 | positive regulation of hormone secretion            | 10/541 | 0.003965758 | 10 |
| GO:0015980 | energy derivation by oxidation of organic compounds | 17/541 | 0.004120696 | 17 |
| GO:0042446 | hormone biosynthetic process                        | 7/541  | 0.004188761 | 7  |
| GO:0042573 | retinoic acid metabolic process                     | 4/541  | 0.004228079 | 4  |
| GO:0072525 | pyridine-containing compound biosynthetic process   | 4/541  | 0.004228079 | 4  |
| GO:0055078 | sodium ion homeostasis                              | 6/541  | 0.004382282 | 6  |
| GO:0032355 | response to estradiol                               | 10/541 | 0.004489098 | 10 |
| GO:0010863 | positive regulation of phospholipase C activity     | 5/541  | 0.004511749 | 5  |
| GO:0006081 | cellular aldehyde metabolic                         | 7/541  | 0.004574825 | 7  |
| GO:0035384 | thioester biosynthetic process                      | 7/541  | 0.004574825 | 7  |
| GO:0071616 | acyl-CoA biosynthetic process                       | 7/541  | 0.004574825 | 7  |
| GO:0000185 | activation of MAPKKK activity                       | 3/541  | 0.004614577 | 3  |
| GO:0006702 | androgen biosynthetic process                       | 3/541  | 0.004614577 | 3  |
| GO:0010566 | regulation of ketone biosynthetic process           | 3/541  | 0.004614577 | 3  |
| GO:0010872 | regulation of cholesterol esterification            | 3/541  | 0.004614577 | 3  |
| GO:0016114 | terpenoid biosynthetic process                      | 3/541  | 0.004614577 | 3  |
| GO:0019852 | L-ascorbic acid metabolic                           | 3/541  | 0.004614577 | 3  |
| GO:0034374 | low-density lipoprotein particle remodeling         | 3/541  | 0.004614577 | 3  |
| GO:0045820 | negative regulation of glycolytic process           | 3/541  | 0.004614577 | 3  |
| GO:0051195 | negative regulation of cofactor metabolic process   | 3/541  | 0.004614577 | 3  |
| GO:0051198 | negative regulation of coenzyme metabolic process   | 3/541  | 0.004614577 | 3  |
| GO:0051955 | regulation of amino acid                            | 3/541  | 0.004614577 | 3  |
| GO:0097286 | iron ion import                                     | 3/541  | 0.004614577 | 3  |
| GO:2000121 | regulation of removal of superoxide radicals        | 3/541  | 0.004614577 | 3  |
| GO:0070372 | regulation of ERK1 and ERK2 cascade                 | 16/541 | 0.004697372 | 16 |
| GO:0015748 | organophosphate ester transport                     | 8/541  | 0.004707034 | 8  |
| GO:0043550 | regulation of lipid kinase                          | 6/541  | 0.004859867 | 6  |
| GO:0002449 | lymphocyte mediated immunity                        | 16/541 | 0.00488994  | 16 |
| GO:1901136 | carbohydrate derivative catabolic process           | 13/541 | 0.004944933 | 13 |

|            |                                                             |        |             |    |
|------------|-------------------------------------------------------------|--------|-------------|----|
| GO:0048514 | blood vessel morphogenesis                                  | 27/541 | 0.00495281  | 27 |
| GO:0042311 | vasodilation                                                | 7/541  | 0.004987129 | 7  |
| GO:0006700 | C21-steroid hormone biosynthetic process                    | 4/541  | 0.005036964 | 4  |
| GO:0030539 | male genitalia development                                  | 4/541  | 0.005036964 | 4  |
| GO:0090181 | regulation of cholesterol metabolic process                 | 4/541  | 0.005036964 | 4  |
| GO:0006730 | one-carbon metabolic process                                | 5/541  | 0.005125922 | 5  |
| GO:0032103 | positive regulation of response to external stimulus        | 17/541 | 0.005192193 | 17 |
| GO:0042157 | lipoprotein metabolic process                               | 11/541 | 0.005352393 | 11 |
| GO:0042542 | response to hydrogen peroxide                               | 10/541 | 0.005374422 | 10 |
| GO:0060420 | regulation of heart growth                                  | 6/541  | 0.005374606 | 6  |
| GO:0006026 | aminoglycan catabolic process                               | 7/541  | 0.005426757 | 7  |
| GO:2000379 | positive regulation of reactive oxygen species metabolic    | 8/541  | 0.005457762 | 8  |
| GO:0034284 | response to monosaccharide                                  | 13/541 | 0.005689856 | 13 |
| GO:0045766 | positive regulation of                                      | 10/541 | 0.005698055 | 10 |
| GO:0001990 | regulation of systemic arterial blood pressure by hormone   | 5/541  | 0.005797002 | 5  |
| GO:0006778 | porphyrin-containing compound metabolic process             | 5/541  | 0.005797002 | 5  |
| GO:0048662 | negative regulation of smooth muscle cell proliferation     | 5/541  | 0.005797002 | 5  |
| GO:1900274 | regulation of phospholipase C activity                      | 5/541  | 0.005797002 | 5  |
| GO:1903409 | reactive oxygen species biosynthetic process                | 8/541  | 0.005865749 | 8  |
| GO:0046470 | phosphatidylcholine metabolic process                       | 7/541  | 0.005894797 | 7  |
| GO:0046165 | alcohol biosynthetic process                                | 9/541  | 0.005904362 | 9  |
| GO:0003081 | regulation of systemic arterial blood pressure by renin-    | 4/541  | 0.00594336  | 4  |
| GO:0043252 | sodium-independent organic anion transport                  | 4/541  | 0.00594336  | 4  |
| GO:0045922 | negative regulation of fatty acid metabolic process         | 4/541  | 0.00594336  | 4  |
| GO:0045940 | positive regulation of steroid metabolic process            | 4/541  | 0.00594336  | 4  |
| GO:0009109 | coenzyme catabolic process                                  | 3/541  | 0.006005785 | 3  |
| GO:0009404 | toxin metabolic process                                     | 3/541  | 0.006005785 | 3  |
| GO:0019755 | one-carbon compound transport                               | 3/541  | 0.006005785 | 3  |
| GO:0051818 | disruption of cells of other organism involved in symbiotic | 3/541  | 0.006005785 | 3  |
| GO:0051883 | killing of cells in other organism involved in symbiotic    | 3/541  | 0.006005785 | 3  |



| GO:1901678          | iron coordination entity                                       | 3/541     | 0.006005785 | 3     |
|---------------------|----------------------------------------------------------------|-----------|-------------|-------|
| GO:1903522          | regulation of blood circulation                                | 18/541    | 0.006248375 | 18    |
| GO:0001933          | negative regulation of protein phosphorylation                 | 22/541    | 0.00635613  | 22    |
| GO:0046209          | nitric oxide metabolic process                                 | 7/541     | 0.006392341 | 7     |
| GO:0006734          | NADH metabolic process                                         | 5/541     | 0.006527643 | 5     |
| GO:0010677          | negative regulation of cellular carbohydrate metabolic process | 5/541     | 0.006527643 | 5     |
| GO:0001655          | urogenital system development                                  | 19/541    | 0.006619896 | 19    |
| GO_CC_down_sig_gene |                                                                |           |             |       |
| ID                  | Description                                                    | GeneRatio | pvalue      | Count |
| GO:0072562          | blood microparticle                                            | 39/555    | 3.35E-26    | 39    |
| GO:0060205          | cytoplasmic membrane-bounded vesicle lumen                     | 24/555    | 1.05E-14    | 24    |
| GO:0031983          | vesicle lumen                                                  | 24/555    | 1.32E-14    | 24    |
| GO:0034774          | secretory granule lumen                                        | 20/555    | 1.26E-12    | 20    |
| GO:0034358          | plasma lipoprotein particle                                    | 14/555    | 3.05E-12    | 14    |
| GO:1990777          | lipoprotein particle                                           | 14/555    | 3.05E-12    | 14    |
| GO:0034364          | high-density lipoprotein particle                              | 12/555    | 4.44E-12    | 12    |
| GO:0032994          | protein-lipid complex                                          | 14/555    | 6.91E-12    | 14    |
| GO:0005759          | mitochondrial matrix                                           | 41/555    | 4.15E-11    | 41    |
| GO:0005782          | peroxisomal matrix                                             | 13/555    | 3.23E-10    | 13    |
| GO:0031907          | microbody lumen                                                | 13/555    | 3.23E-10    | 13    |
| GO:0031093          | platelet alpha granule lumen                                   | 13/555    | 9.11E-09    | 13    |
| GO:0044438          | microbody part                                                 | 16/555    | 1.47E-08    | 16    |
| GO:0044439          | peroxisomal part                                               | 16/555    | 1.47E-08    | 16    |
| GO:0005777          | peroxisome                                                     | 19/555    | 1.47E-08    | 19    |
| GO:0042579          | microbody                                                      | 19/555    | 1.47E-08    | 19    |
| GO:0031091          | platelet alpha granule                                         | 13/555    | 3.84E-07    | 13    |
| GO:0031089          | platelet dense granule lumen                                   | 5/555     | 4.42E-05    | 5     |
| GO:0046930          | pore complex                                                   | 5/555     | 0.000126385 | 5     |
| GO:0030141          | secretory granule                                              | 24/555    | 0.000199035 | 24    |
| GO:0034361          | very-low-density lipoprotein                                   | 5/555     | 0.000293216 | 5     |
| GO:0034385          | triglyceride-rich lipoprotein                                  | 5/555     | 0.000293216 | 5     |
| GO:0042827          | platelet dense granule                                         | 5/555     | 0.000293216 | 5     |
| GO:0016323          | basolateral plasma membrane                                    | 16/555    | 0.000382646 | 16    |
| GO:0005578          | proteinaceous extracellular                                    | 23/555    | 0.0007534   | 23    |
| GO:0005903          | brush border                                                   | 10/555    | 0.000768242 | 10    |
| GO:0005788          | endoplasmic reticulum lumen                                    | 15/555    | 0.001514781 | 15    |
| GO:0071682          | endocytic vesicle lumen                                        | 4/555     | 0.001563542 | 4     |
| GO:0005581          | collagen trimer                                                | 9/555     | 0.001585471 | 9     |
| GO:0005796          | Golgi lumen                                                    | 9/555     | 0.002696985 | 9     |
| GO:0042383          | sarcolemma                                                     | 10/555    | 0.003214003 | 10    |
| GO:0099503          | secretory vesicle                                              | 25/555    | 0.003943563 | 25    |
| GO:0031526          | brush border membrane                                          | 6/555     | 0.004269475 | 6     |
| GO:0045177          | apical part of cell                                            | 20/555    | 0.0052136   | 20    |

| GO_MF_down_sig_gene |                                                                                                                                                                                             |           |          |       |
|---------------------|---------------------------------------------------------------------------------------------------------------------------------------------------------------------------------------------|-----------|----------|-------|
| ID                  | Description                                                                                                                                                                                 | GeneRatio | pvalue   | Count |
| GO:0048037          | cofactor binding                                                                                                                                                                            | 56/537    | 6.40E-30 | 56    |
| GO:0004497          | monooxygenase activity                                                                                                                                                                      | 29/537    | 1.38E-20 | 29    |
| GO:0019825          | oxygen binding                                                                                                                                                                              | 21/537    | 2.84E-19 | 21    |
| GO:0046906          | tetrapyrrole binding                                                                                                                                                                        | 32/537    | 6.47E-19 | 32    |
| GO:0020037          | heme binding                                                                                                                                                                                | 31/537    | 7.18E-19 | 31    |
| GO:0050662          | coenzyme binding                                                                                                                                                                            | 36/537    | 1.10E-18 | 36    |
| GO:0008391          | arachidonic acid<br>monooxygenase activity                                                                                                                                                  | 13/537    | 4.59E-18 | 13    |
| GO:0008392          | arachidonic acid epoxygenase<br>activity                                                                                                                                                    | 13/537    | 4.59E-18 | 13    |
| GO:0016614          | oxidoreductase activity, acting<br>on CH-OH group of donors                                                                                                                                 | 31/537    | 4.92E-18 | 31    |
| GO:0016705          | oxidoreductase activity, acting<br>on paired donors, with<br>incorporation or reduction of                                                                                                  | 31/537    | 8.68E-16 | 31    |
| GO:0005506          | iron ion binding                                                                                                                                                                            | 31/537    | 1.50E-15 | 31    |
| GO:0016712          | oxidoreductase activity, acting<br>on paired donors, with<br>incorporation or reduction of<br>molecular oxygen, reduced<br>flavin or flavoprotein as one<br>donor, and incorporation of one | 14/537    | 1.00E-14 | 14    |
| GO:0008395          | steroid hydroxylase activity                                                                                                                                                                | 15/537    | 2.87E-14 | 15    |
| GO:0009055          | electron carrier activity                                                                                                                                                                   | 24/537    | 2.77E-13 | 24    |
| GO:0016709          | oxidoreductase activity, acting<br>on paired donors, with<br>incorporation or reduction of<br>molecular oxygen, NAD(P)H as<br>one donor, and incorporation of<br>one atom of oxygen         | 15/537    | 2.08E-12 | 15    |
| GO:0016616          | oxidoreductase activity, acting<br>on the CH-OH group of donors,<br>NAD or NADP as acceptor                                                                                                 | 23/537    | 2.24E-12 | 23    |
| GO:0030170          | pyridoxal phosphate binding                                                                                                                                                                 | 16/537    | 1.39E-11 | 16    |
| GO:1901681          | sulfur compound binding                                                                                                                                                                     | 31/537    | 2.01E-11 | 31    |
| GO:0043168          | anion binding                                                                                                                                                                               | 33/537    | 3.66E-11 | 33    |
| GO:0050660          | flavin adenine dinucleotide                                                                                                                                                                 | 18/537    | 4.21E-11 | 18    |
| GO:0016769          | transferase activity, transferring<br>nitrogenous groups                                                                                                                                    | 11/537    | 4.21E-11 | 11    |
| GO:0070330          | aromatase activity                                                                                                                                                                          | 11/537    | 4.21E-11 | 11    |
| GO:0000062          | fatty-acyl-CoA binding                                                                                                                                                                      | 12/537    | 7.24E-11 | 12    |
| GO:0016627          | oxidoreductase activity, acting<br>on the CH-CH group of donors                                                                                                                             | 15/537    | 2.94E-10 | 15    |
| GO:0008483          | transaminase activity                                                                                                                                                                       | 10/537    | 3.51E-10 | 10    |

|            |                                                                                                               |        |          |    |
|------------|---------------------------------------------------------------------------------------------------------------|--------|----------|----|
| GO:0052890 | oxidoreductase activity, acting on the CH-CH group of donors, with a flavin as acceptor                       | 9/537  | 3.96E-10 | 9  |
| GO:0005319 | lipid transporter activity                                                                                    | 20/537 | 4.41E-10 | 20 |
| GO:0003995 | acyl-CoA dehydrogenase                                                                                        | 9/537  | 8.18E-10 | 9  |
| GO:0031406 | carboxylic acid binding                                                                                       | 22/537 | 3.64E-09 | 22 |
| GO:0016725 | oxidoreductase activity, acting on CH or CH2 groups                                                           | 7/537  | 4.45E-09 | 7  |
| GO:0005539 | glycosaminoglycan binding                                                                                     | 25/537 | 1.74E-08 | 25 |
| GO:0005496 | steroid binding                                                                                               | 16/537 | 2.47E-08 | 16 |
| GO:0017171 | serine hydrolase activity                                                                                     | 26/537 | 9.48E-08 | 26 |
| GO:0004252 | serine-type endopeptidase                                                                                     | 24/537 | 1.28E-07 | 24 |
| GO:0005342 | organic acid transmembrane transporter activity                                                               | 17/537 | 2.77E-07 | 17 |
| GO:0008236 | serine-type peptidase activity                                                                                | 25/537 | 2.79E-07 | 25 |
| GO:0046943 | carboxylic acid transmembrane transporter activity                                                            | 16/537 | 1.00E-06 | 16 |
| GO:0016702 | oxidoreductase activity, acting on single donors with incorporation of molecular oxygen, incorporation of two | 8/537  | 1.21E-06 | 8  |
| GO:0008028 | monocarboxylic acid transmembrane transporter                                                                 | 9/537  | 1.40E-06 | 9  |
| GO:0016645 | oxidoreductase activity, acting on the CH-NH group of donors                                                  | 8/537  | 1.67E-06 | 8  |
| GO:0016701 | oxidoreductase activity, acting on single donors with incorporation of molecular                              | 8/537  | 1.67E-06 | 8  |
| GO:0016903 | oxidoreductase activity, acting on the aldehyde or oxo group of donors                                        | 10/537 | 1.93E-06 | 10 |
| GO:0016829 | lyase activity                                                                                                | 19/537 | 3.40E-06 | 19 |
| GO:0016830 | carbon-carbon lyase activity                                                                                  | 10/537 | 4.32E-06 | 10 |
| GO:0008201 | heparin binding                                                                                               | 18/537 | 4.67E-06 | 18 |
| GO:0019842 | vitamin binding                                                                                               | 12/537 | 1.13E-05 | 12 |
| GO:0004866 | endopeptidase inhibitor activity                                                                              | 18/537 | 1.20E-05 | 18 |
| GO:0004867 | serine-type endopeptidase inhibitor activity                                                                  | 13/537 | 1.37E-05 | 13 |
| GO:0016878 | acid-thiol ligase activity                                                                                    | 7/537  | 1.54E-05 | 7  |
| GO:0050661 | NADP binding                                                                                                  | 9/537  | 1.58E-05 | 9  |
| GO:0004745 | retinol dehydrogenase activity                                                                                | 6/537  | 1.64E-05 | 6  |
| GO:0061135 | endopeptidase regulator activity                                                                              | 18/537 | 1.94E-05 | 18 |
| GO:0030414 | peptidase inhibitor activity                                                                                  | 18/537 | 2.44E-05 | 18 |
| GO:0051287 | NAD binding                                                                                                   | 9/537  | 2.70E-05 | 9  |

|            |                                                       |        |             |    |
|------------|-------------------------------------------------------|--------|-------------|----|
| GO:0015291 | secondary active transmembrane transporter activity   | 21/537 | 2.86E-05    | 21 |
| GO:1901618 | organic hydroxy compound transmembrane transporter    | 8/537  | 3.98E-05    | 8  |
| GO:0004175 | endopeptidase activity                                | 31/537 | 4.91E-05    | 31 |
| GO:0005343 | organic acid:sodium symporter activity                | 6/537  | 5.89E-05    | 6  |
| GO:0016597 | amino acid binding                                    | 9/537  | 6.03E-05    | 9  |
| GO:0015296 | anion:cation symporter activity                       | 7/537  | 6.63E-05    | 7  |
| GO:0015293 | symporter activity                                    | 15/537 | 6.96E-05    | 15 |
| GO:0015125 | bile acid transmembrane transporter activity          | 5/537  | 8.67E-05    | 5  |
| GO:0030246 | carbohydrate binding                                  | 21/537 | 9.00E-05    | 21 |
| GO:0008514 | organic anion transmembrane transporter activity      | 11/537 | 9.39E-05    | 11 |
| GO:0004857 | enzyme inhibitor activity                             | 27/537 | 0.000120428 | 27 |
| GO:0015645 | fatty acid ligase activity                            | 5/537  | 0.000122739 | 5  |
| GO:0043178 | alcohol binding                                       | 10/537 | 0.000132668 | 10 |
| GO:0022804 | active transmembrane transporter activity             | 26/537 | 0.000152239 | 26 |
| GO:0051213 | dioxygenase activity                                  | 11/537 | 0.000159285 | 11 |
| GO:0015370 | solute:sodium symporter hydrolase activity, acting on | 8/537  | 0.000179865 | 8  |
| GO:0016810 | carbon-nitrogen (but not peptide) bonds               | 14/537 | 0.000232588 | 14 |
| GO:0042562 | hormone binding                                       | 9/537  | 0.000233449 | 9  |
| GO:0016229 | steroid dehydrogenase activity                        | 6/537  | 0.000251566 | 6  |
| GO:0061134 | peptidase regulator activity                          | 18/537 | 0.000278937 | 18 |
| GO:0015485 | cholesterol binding                                   | 7/537  | 0.00029254  | 7  |
| GO:0016877 | ligase activity, forming carbon-sulfur bonds          | 7/537  | 0.00029254  | 7  |
| GO:0038024 | cargo receptor activity                               | 9/537  | 0.000296012 | 9  |
| GO:0015294 | solute:cation symporter activity                      | 11/537 | 0.000342537 | 11 |
| GO:0015248 | sterol transporter activity                           | 5/537  | 0.00039059  | 5  |
| GO:0005283 | sodium:amino acid symporter activity                  | 4/537  | 0.000465987 | 4  |
| GO:0032934 | sterol binding                                        | 7/537  | 0.000617818 | 7  |
| GO:0004467 | long-chain fatty acid-CoA ligase activity             | 4/537  | 0.000655644 | 4  |
| GO:0015245 | fatty acid transporter activity                       | 4/537  | 0.000655644 | 4  |
| GO:0033218 | amide binding                                         | 19/537 | 0.000740663 | 19 |
| GO:0048029 | monosaccharide binding                                | 7/537  | 0.000809048 | 7  |
| GO:0017046 | peptide hormone binding                               | 6/537  | 0.000891607 | 6  |
| GO:0070402 | NADPH binding                                         | 4/537  | 0.000894134 | 4  |

|            |                                                                                                 |        |             |    |
|------------|-------------------------------------------------------------------------------------------------|--------|-------------|----|
| GO:0016831 | carboxy-lyase activity                                                                          | 6/537  | 0.001040572 | 6  |
| GO:0017127 | cholesterol transporter activity                                                                | 4/537  | 0.001187738 | 4  |
| GO:0034185 | apolipoprotein binding                                                                          | 4/537  | 0.001187738 | 4  |
| GO:0072341 | modified amino acid binding                                                                     | 8/537  | 0.001405386 | 8  |
| GO:0004033 | aldo-keto reductase (NADP) activity                                                             | 5/537  | 0.001407786 | 5  |
| GO:0005416 | cation:amino acid symporter activity                                                            | 4/537  | 0.001542738 | 4  |
| GO:0016722 | oxidoreductase activity, oxidizing metal ions                                                   | 4/537  | 0.001542738 | 4  |
| GO:0048038 | quinone binding                                                                                 | 4/537  | 0.001965367 | 4  |
| GO:0008238 | exopeptidase activity                                                                           | 10/537 | 0.002416111 | 10 |
| GO:0015238 | drug transmembrane transporter activity                                                         | 4/537  | 0.002461771 | 4  |
| GO:0008509 | anion transmembrane transporter activity                                                        | 15/537 | 0.002875456 | 15 |
| GO:0019838 | growth factor binding                                                                           | 11/537 | 0.002983477 | 11 |
| GO:0005537 | mannose binding                                                                                 | 4/537  | 0.003037966 | 4  |
| GO:0005044 | scavenger receptor activity                                                                     | 6/537  | 0.00339042  | 6  |
| GO:0005548 | phospholipid transporter activity                                                               | 6/537  | 0.004229368 | 6  |
| GO:0001871 | pattern binding                                                                                 | 4/537  | 0.004452972 | 4  |
| GO:0015347 | sodium-independent organic anion transmembrane                                                  | 4/537  | 0.004452972 | 4  |
| GO:0030247 | polysaccharide binding                                                                          | 4/537  | 0.004452972 | 4  |
| GO:0090484 | drug transporter activity                                                                       | 4/537  | 0.004452972 | 4  |
| GO:0015643 | toxic substance binding                                                                         | 3/537  | 0.004807051 | 3  |
| GO:0016836 | hydro-lyase activity                                                                            | 6/537  | 0.005212424 | 6  |
| GO:0015081 | sodium ion transmembrane transporter activity                                                   | 11/537 | 0.005637531 | 11 |
| GO:0016620 | oxidoreductase activity, acting on the aldehyde or oxo group of donors, NAD or NADP as acceptor | 5/537  | 0.006159458 | 5  |
| GO:0033293 | monocarboxylic acid binding                                                                     | 6/537  | 0.006353227 | 6  |
| GO:0052689 | carboxylic ester hydrolase                                                                      | 11/537 | 0.006614989 | 11 |
| GO:0016628 | oxidoreductase activity, acting on the CH-CH group of donors, NAD or NADP as acceptor           | 4/537  | 0.007313728 | 4  |
| GO:0071813 | lipoprotein particle binding                                                                    | 4/537  | 0.007313728 | 4  |
| GO:0071814 | protein-lipid complex binding                                                                   | 4/537  | 0.007313728 | 4  |
| GO:0016918 | retinal binding                                                                                 | 3/537  | 0.007933601 | 3  |
| GO:0017017 | MAP kinase tyrosine/serine/threonine phosphatase activity                                       | 3/537  | 0.007933601 | 3  |
| GO:0019841 | retinol binding                                                                                 | 3/537  | 0.007933601 | 3  |
| GO:0004181 | metallocarboxypeptidase                                                                         | 4/537  | 0.008484281 | 4  |

|                                                                                                                                                                          |                                                                                              |       |             |   |
|--------------------------------------------------------------------------------------------------------------------------------------------------------------------------|----------------------------------------------------------------------------------------------|-------|-------------|---|
| GO:0033764                                                                                                                                                               | steroid dehydrogenase activity, acting on the CH-OH group of donors, NAD or NADP as acceptor | 4/537 | 0.008484281 | 4 |
| Annotation: 1.down_sig_gene: 577 down-regulated genes;2.up_sig_gene: 82 up-regulated genes; 3.BP: Biological Process; 4.CC: Cellular Component; 5.MF: Molecular Function |                                                                                              |       |             |   |

Table S4. KEGG analysis of the modules from WGCNA

| brown     |                                         |           |             |                                                                                                                                                                |       |
|-----------|-----------------------------------------|-----------|-------------|----------------------------------------------------------------------------------------------------------------------------------------------------------------|-------|
| ID        | Description                             | GeneRatio | pvalue      | geneID                                                                                                                                                         | Count |
| hsa04110  | Cell cycle                              | 4/5       | 3.88E-07    | CCNA2/CCNB2/P<br>TTG1/TTK                                                                                                                                      | 4     |
| hsa04914  | Progesterone-mediated oocyte maturation | 2/5       | 0.001764807 | CCNA2/CCNB2                                                                                                                                                    | 2     |
| hsa04114  | Oocyte meiosis                          | 2/5       | 0.002755317 | CCNB2/PTTG1                                                                                                                                                    | 2     |
| hsa04218  | Cellular senescence                     | 2/5       | 0.00455036  | CCNA2/CCNB2                                                                                                                                                    | 2     |
| hsa05166  | HTLV-I infection                        | 2/5       | 0.011283965 | CCNB2/PTTG1                                                                                                                                                    | 2     |
| turquoise |                                         |           |             |                                                                                                                                                                |       |
| ID        | Description                             | GeneRatio | pvalue      | geneID                                                                                                                                                         | Count |
| hsa04610  | Complement and coagulation cascades     | 26/311    | 5.27E-17    | C1R/C1S/C4BPA/<br>C6/C8A/C8B/C9/C<br>F1/CPB2/F11/F12/F<br>2/F8/F9/FGA/FGB/<br>KLB1/MASP1/M<br>ASP2/MBL2/PLG/<br>PROC/PROS1/SER<br>PINC1/SERPINF2/<br>SERPING1  | 26    |
| hsa00071  | Fatty acid degradation                  | 20/311    | 1.42E-16    | ACAA1/ACADL/A<br>CADM/ACADS/A<br>CADSB/ACADVL/<br>ACAT1/ACOX1/A<br>CSL1/ACSL5/ADH<br>1A/ADH1B/ADH4/<br>ADH6/ALDH2/CP<br>T2/CYP4A11/CYP<br>4A22/EHHADH/G<br>CDH | 20    |

|          |                                            |        |          |                                                                                                                                          |    |
|----------|--------------------------------------------|--------|----------|------------------------------------------------------------------------------------------------------------------------------------------|----|
| hsa03320 | PPAR signaling pathway                     | 22/311 | 8.36E-14 | ACAA1/ACADL/ACADM/ACOX1/ACOX2/ACSL1/ACSL5/ANGPTL4/APOA1/APOA5/APOC3/CPT2/CYP8B1/EHHADH/FABP1/HMGCS2/PCK1/PCK2/PLIN1/SCP2/SLC27A2/SLC27A5 | 22 |
| hsa00830 | Retinol metabolism                         | 20/311 | 1.01E-12 | ADH1A/ADH1B/ADH4/ADH6/AOX1/CYP1A1/CYP1A2/CYP26A1/CYP2A6/CYP2B6/CYP2C18/CYP2C8/CYP2C9/CYP3A4/CYP3A5/CYP4A11/HSD17B6/RDH16/RDH5/UGT2B7     | 20 |
| hsa00380 | Tryptophan metabolism                      | 15/311 | 2.94E-11 | AADAT/ACAT1/ACMSD/ALDH2/AOX1/CAT/CYP1A1/CYP1A2/EHHADH/GCDH/HAAO/IDO2/KMO/OGDHL/TDO2                                                      | 15 |
| hsa00280 | Valine, leucine and isoleucine degradation | 16/311 | 5.08E-11 | ABAT/ACAA1/ACADM/ACADS/ACADSB/ACAT1/AGXT2/ALDH2/ALDH6A1/AOX1/BCKDHB/EHHADH/HMGCL/HMGCS2/IVD/MUT                                          | 16 |

|          |                                             |        |          |                                                                                                                                                                            |    |
|----------|---------------------------------------------|--------|----------|----------------------------------------------------------------------------------------------------------------------------------------------------------------------------|----|
| hsa05204 | Chemical carcinogenesis                     | 20/311 | 1.14E-10 | ADH1A/ADH1B/A<br>DH4/ADH6/CYP1<br>A1/CYP1A2/CYP2<br>A13/CYP2A6/CYP<br>2C18/CYP2C19/C<br>YP2C8/CYP2C9/C<br>YP2E1/CYP3A4/C<br>YP3A43/CYP3A5/<br>NAT1/NAT2/SUL<br>T2A1/UGT2B7 | 20 |
| hsa00260 | Glycine, serine and threonine metabolism    | 14/311 | 4.01E-10 | AGXT/AGXT2/AL<br>AS1/BHMT/CBS/C<br>TH/DAO/DMGDH/<br>GATM/GNMT/GR<br>HPR/PIPOX/SARD<br>H/SDS                                                                                | 14 |
| hsa00250 | Alanine, aspartate and glutamate metabolism | 13/311 | 7.32E-10 | ABAT/AGXT/AG<br>XT2/ASPA/ASS1/<br>CPS1/FOLH1/GLS<br>2/GLUD1/GOT1/G<br>OT2/GPT/GPT2                                                                                         | 13 |
| hsa00350 | Tyrosine metabolism                         | 13/311 | 1.10E-09 | ADH1A/ADH1B/A<br>DH4/ADH6/AOX1/<br>DBH/FAH/GOT1/<br>GOT2/GSTZ1/HG<br>D/HPD/TAT                                                                                             | 13 |
| hsa01200 | Carbon metabolism                           | 22/311 | 2.35E-09 | ACADM/ACADS/<br>ACAT1/AGXT/AL<br>DH6A1/ALDOB/C<br>AT/CPS1/EHHAD<br>H/ENO3/FBP1/GL<br>UD1/GOT1/GOT2/<br>GPT/GPT2/HAO1/<br>HAO2/MUT/OGD<br>HL/RGN/SDS                        | 22 |



|          |                                              |        |          |                                                                                                                                         |    |
|----------|----------------------------------------------|--------|----------|-----------------------------------------------------------------------------------------------------------------------------------------|----|
| hsa00982 | Drug metabolism - cytochrome P450            | 17/311 | 3.18E-09 | ADH1A/ADH1B/A<br>DH4/ADH6/AOX1/<br>CYP1A2/CYP2A6/<br>CYP2B6/CYP2C19<br>/CYP2C8/CYP2C9/<br>CYP2E1/CYP3A4/<br>CYP3A5/FMO3/F<br>MO4/UGT2B7 | 17 |
| hsa00220 | Arginine biosynthesis                        | 10/311 | 3.88E-09 | ARG1/ASS1/CPS1/<br>GLS2/GLUD1/GO<br>T1/GOT2/GPT/GP<br>T2/OTC                                                                            | 10 |
| hsa04146 | Peroxisome                                   | 18/311 | 7.61E-09 | ACAA1/ACOX1/A<br>COX2/ACSL1/AC<br>SL5/AGXT/CAT/D<br>AO/EHHADH/EPH<br>X2/HAO1/HAO2/H<br>MGCL/PIPOX/PX<br>MP2/SCP2/SLC27<br>A2/XDH        | 18 |
| hsa00650 | Butanoate metabolism                         | 11/311 | 7.71E-09 | ABAT/ACADS/AC<br>AT1/ACSM2A/AC<br>SM3/ACSM5/BDH<br>1/BDH2/EHHADH<br>/HMGCL/HMGCS<br>2                                                   | 11 |
| hsa00980 | Metabolism of xenobiotics by cytochrome P450 | 16/311 | 5.54E-08 | ADH1A/ADH1B/A<br>DH4/ADH6/AKR7<br>A3/CYP1A1/CYP1<br>A2/CYP2A13/CYP<br>2A6/CYP2B6/CYP<br>2C9/CYP2E1/CYP<br>3A4/CYP3A5/SUL<br>T2A1/UGT2B7 | 16 |

|          |                                               |        |          |                                                                                                                          |    |
|----------|-----------------------------------------------|--------|----------|--------------------------------------------------------------------------------------------------------------------------|----|
| hsa01230 | Biosynthesis of amino acids                   | 15/311 | 3.57E-07 | ALDOB/ARG1/AS<br>S1/CBS/CPS1/CTH<br>/ENO3/GOT1/GOT<br>2/GPT/GPT2/MAT<br>1A/OTC/SDS/TAT                                   | 15 |
| hsa01212 | Fatty acid metabolism                         | 12/311 | 4.94E-07 | ACAA1/ACADL/A<br>CADM/ACADS/A<br>CADSB/ACADVL/<br>ACAT1/ACOX1/A<br>CSL1/ACSL5/CPT<br>2/EHHADH                            | 12 |
| hsa04976 | Bile secretion                                | 14/311 | 1.26E-06 | ABCB4/ABCG2/A<br>QP9/CA2/CYP3A4<br>/KCNN2/SLC10A1<br>/SLC22A1/SLC22<br>A7/SLC27A5/SLC<br>4A4/SLCO1B1/SL<br>CO1B3/SULT2A1 | 14 |
| hsa00270 | Cysteine and methionine<br>metabolism         | 11/311 | 1.90E-06 | ADI1/AGXT2/BH<br>MT/CBS/CDO1/C<br>TH/GOT1/GOT2/<br>MAT1A/SDS/TAT                                                         | 11 |
| hsa00120 | Primary bile acid biosynthesis                | 7/311  | 3.15E-06 | ACOX2/AKR1C4/<br>AKR1D1/CYP39A<br>1/CYP8B1/SCP2/S<br>LC27A5                                                              | 7  |
| hsa00630 | Glyoxylate and dicarboxylate<br>metabolism    | 8/311  | 1.44E-05 | ACAT1/AGXT/CA<br>T/GRHPR/HAO1/<br>HAO2/HOGA1/M<br>UT                                                                     | 8  |
| hsa00072 | Synthesis and degradation of<br>ketone bodies | 5/311  | 2.84E-05 | ACAT1/BDH1/BD<br>H2/HMGCL/HMG<br>CS2                                                                                     | 5  |
| hsa00410 | beta-Alanine metabolism                       | 8/311  | 3.26E-05 | ABAT/ACADM/A<br>LDH2/ALDH6A1/<br>CNDP1/DPYS/EH<br>HADH/UPB1                                                              | 8  |

|          |                                 |        |             |                                                                                        |    |
|----------|---------------------------------|--------|-------------|----------------------------------------------------------------------------------------|----|
| hsa00330 | Arginine and proline metabolism | 10/311 | 3.76E-05    | ALDH2/ARG1/CN<br>DP1/DAO/GATM/<br>GOT1/GOT2/HOG<br>A1/OAT/PRODH2                       | 10 |
| hsa00640 | Propanoate metabolism           | 8/311  | 4.19E-05    | ABAT/ACACB/AC<br>ADM/ACAT1/AL<br>DH6A1/BCKDHB/<br>EHHADH/MUT                           | 8  |
| hsa00983 | Drug metabolism - other enzymes | 9/311  | 0.000110561 | CES2/CYP2A6/CY<br>P3A4/DPYS/NAT1<br>/NAT2/UGT2B7/U<br>PB1/XDH                          | 9  |
| hsa00010 | Glycolysis / Gluconeogenesis    | 11/311 | 0.000119928 | ADH1A/ADH1B/A<br>DH4/ADH6/ALDH<br>2/ALDOB/ENO3/F<br>BP1/PCK1/PCK2/P<br>GM1             | 11 |
| hsa00591 | Linoleic acid metabolism        | 7/311  | 0.00016286  | CYP1A2/CYP2C19<br>/CYP2C8/CYP2C9/<br>CYP2E1/CYP2J2/C<br>YP3A4                          | 7  |
| hsa00140 | Steroid hormone biosynthesis    | 10/311 | 0.000163681 | AKR1C4/AKR1D1<br>/CYP1A1/CYP1A2<br>/CYP2E1/CYP3A4/<br>CYP3A5/HSD17B6<br>/SRD5A1/UGT2B7 | 10 |
| hsa00620 | Pyruvate metabolism             | 8/311  | 0.000188896 | ACACB/ACAT1/A<br>COT12/ALDH2/G<br>RHPR/LDHD/PCK<br>1/PCK2                              | 8  |
| hsa04979 | Cholesterol metabolism          | 9/311  | 0.000216466 | ANGPTL3/ANGPT<br>L4/APOA1/APOC3<br>/CETP/LCAT/LIPC<br>/LIPG/LPA                        | 9  |

| hsa00590 | Arachidonic acid metabolism             | 10/311    | 0.000250172 | CYP2B6/CYP2C19<br>/CYP2C8/CYP2C9/<br>CYP2E1/CYP2J2/C<br>YP4A11/CYP4F2/<br>CYP4F3/EPHX2 | 10    |
|----------|-----------------------------------------|-----------|-------------|----------------------------------------------------------------------------------------|-------|
| hsa00340 | Histidine metabolism                    | 6/311     | 0.000306996 | ALDH2/AMDHD1/<br>ASPA/CNDP1/FTC<br>D/UROC1                                             | 6     |
| hsa04964 | Proximal tubule bicarbonate reclamation | 6/311     | 0.000306996 | CA2/GLS2/GLUD1<br>/PCK1/PCK2/SLC4<br>A4                                                | 6     |
| hsa00360 | Phenylalanine metabolism                | 5/311     | 0.000544794 | GLYAT/GOT1/GO<br>T2/HPD/TAT                                                            | 5     |
| hsa01210 | 2-Oxocarboxylic acid metabolism         | 5/311     | 0.000728327 | AADAT/GOT1/GO<br>T2/GPT/GPT2                                                           | 5     |
| hsa00310 | Lysine degradation                      | 9/311     | 0.000775834 | AADAT/AASS/AC<br>AT1/ALDH2/BBO<br>X1/EHHADH/GCD<br>H/OGDHL/PIPOX                       | 9     |
| hsa04978 | Mineral absorption                      | 8/311     | 0.001254665 | MT1E/MT1F/MT1<br>G/MT1H/MT1HL1<br>/MT1M/MT1X/MT<br>2A                                  | 8     |
| hsa05150 | Staphylococcus aureus infection         | 8/311     | 0.002328527 | C1R/C1S/CFI/FCG<br>R2B/MASP1/MAS<br>P2/MBL2/PLG                                        | 8     |
| blue     |                                         |           |             |                                                                                        |       |
| ID       | Description                             | GeneRatio | pvalue      | geneID                                                                                 | Count |
| hsa04060 | Cytokine-cytokine receptor interaction  | 5/15      | 0.000146024 | CCL21/CXCL12/H<br>GF/NGFR/PDGFR<br>A                                                   | 5     |
| hsa04015 | Rap1 signaling pathway                  | 4/15      | 0.000701687 | HGF/NGFR/PDGF<br>RA/TEK                                                                | 4     |

|          |                            |      |             |                         |   |
|----------|----------------------------|------|-------------|-------------------------|---|
| hsa04014 | Ras signaling pathway      | 4/15 | 0.001087718 | HGF/NGFR/PDGF<br>RA/TEK | 4 |
| hsa04010 | MAPK signaling pathway     | 4/15 | 0.002452679 | HGF/NGFR/PDGF<br>RA/TEK | 4 |
| hsa04151 | PI3K-Akt signaling pathway | 4/15 | 0.004661724 | HGF/NGFR/PDGF<br>RA/TEK | 4 |

Table S5. KEGG and GO analysis of the sub-clusters from PPI network

| KEGG-cluster1 |                                            |           |          |                                                                                                                             |       |
|---------------|--------------------------------------------|-----------|----------|-----------------------------------------------------------------------------------------------------------------------------|-------|
| ID            | Description                                | GeneRatio | pvalue   | geneID                                                                                                                      | Count |
| hsa00071      | Fatty acid degradation                     | 16/37     | 9.90E-26 | ACSL1/ACSL1/GC<br>DH/GCDH/ACAA<br>1/ACAA1/ACADL/<br>ACADM/ACADM/<br>ACADS/ACADS/A<br>CADSB/ACADSB/<br>ACAT1/ACAT1/A<br>CSL5 | 16    |
| hsa01212      | Fatty acid metabolism                      | 14/37     | 5.74E-21 | ACSL1/ACSL1/AC<br>AA1/ACAA1/ACA<br>DL/ACADM/ACA<br>DM/ACADS/ACA<br>DS/ACADSB/ACA<br>DSB/ACAT1/ACA<br>T1/ACSL5               | 14    |
| hsa00280      | Valine, leucine and isoleucine degradation | 13/37     | 2.44E-19 | ACAA1/ACAA1/A<br>CADM/ACADM/A<br>CADS/ACADS/AC<br>ADSB/ACADSB/A<br>CAT1/ACAT1/MU<br>T/MUT/MUT                               | 13    |

|          |                                            |       |             |                                                              |    |
|----------|--------------------------------------------|-------|-------------|--------------------------------------------------------------|----|
| hsa04610 | Complement and coagulation cascades        | 11/37 | 9.29E-14    | F2/F8/FGA/FGB/FGB/PLG/SERPINF2/PROS1/PROS1/SERPING1/SERPING1 | 11 |
| hsa00650 | Butanoate metabolism                       | 7/37  | 1.51E-10    | ACSM2A/ACADS/ACADS/ACAT1/ACAT1/ACSM5/ACSM3                   | 7  |
| hsa00640 | Propanoate metabolism                      | 7/37  | 6.14E-10    | ACADM/ACADM/ACAT1/ACAT1/MUT/MUT/MUT                          | 7  |
| hsa03320 | PPAR signaling pathway                     | 8/37  | 9.12E-09    | ACSL1/ACSL1/ACAA1/ACAA1/ACADL/ACADM/ACADM/ACSL5              | 8  |
| hsa01200 | Carbon metabolism                          | 9/37  | 1.90E-08    | ACADM/ACADM/ACADS/ACADS/ACAT1/ACAT1/MUT/MUT/MUT              | 9  |
| hsa00630 | Glyoxylate and dicarboxylate metabolism    | 5/37  | 5.10E-07    | ACAT1/ACAT1/MUT/MUT/MUT                                      | 5  |
| hsa00380 | Tryptophan metabolism                      | 4/37  | 5.06E-05    | GCDH/GCDH/ACAT1/ACAT1                                        | 4  |
| hsa00061 | Fatty acid biosynthesis                    | 3/37  | 5.91E-05    | ACSL1/ACSL1/ACSL5                                            | 3  |
| hsa04146 | Peroxisome                                 | 5/37  | 5.96E-05    | ACSL1/ACSL1/ACAA1/ACAA1/ACSL5                                | 5  |
| hsa00310 | Lysine degradation                         | 4/37  | 0.000143368 | GCDH/GCDH/ACAT1/ACAT1                                        | 4  |
| hsa00072 | Synthesis and degradation of ketone bodies | 2/37  | 0.001544451 | ACAT1/ACAT1                                                  | 2  |
| hsa04216 | Ferroptosis                                | 3/37  | 0.001893197 | ACSL1/ACSL1/ACSL5                                            | 3  |
| hsa00592 | alpha-Linolenic acid metabolism            | 2/37  | 0.005419416 | ACAA1/ACAA1                                                  | 2  |

|          |                                          |      |             |                   |   |
|----------|------------------------------------------|------|-------------|-------------------|---|
| hsa00900 | Terpenoid backbone biosynthesis          | 2/37 | 0.005779744 | ACAT1/ACAT1       | 2 |
| hsa01040 | Biosynthesis of unsaturated fatty acids  | 2/37 | 0.006150777 | ACAA1/ACAA1       | 2 |
| hsa04920 | Adipocytokine signaling pathway          | 3/37 | 0.008236355 | ACSL1/ACSL1/ACSL5 | 3 |
| hsa00040 | Pentose and glucuronate interconversions | 2/37 | 0.011409567 | CRYL1/CRYL1       | 2 |
| hsa00410 | beta-Alanine metabolism                  | 2/37 | 0.012425386 | ACADM/ACADM       | 2 |

#### KEGG-cluster2

| ID       | Description                                  | GeneRatio | pvalue   | geneID                                                                                                                             | Count |
|----------|----------------------------------------------|-----------|----------|------------------------------------------------------------------------------------------------------------------------------------|-------|
| hsa00830 | Retinol metabolism                           | 15/43     | 5.17E-21 | CYP1A1/CYP1A1/<br>CYP1A2/CYP2B6/<br>CYP2C9/CYP2C9/<br>CYP3A4/CYP3A4/<br>CYP3A5/CYP4A11<br>/CYP26A1/AOX1/<br>UGT2B7/HSD17B6/HSD17B6 | 15    |
| hsa00980 | Metabolism of xenobiotics by cytochrome P450 | 11/43     | 1.09E-12 | CYP1A1/CYP1A1/<br>CYP1A2/CYP2B6/<br>CYP2C9/CYP2C9/<br>CYP2E1/CYP3A4/<br>CYP3A4/CYP3A5/<br>UGT2B7                                   | 11    |
| hsa00140 | Steroid hormone biosynthesis                 | 10/43     | 1.73E-12 | CYP1A1/CYP1A1/<br>CYP1A2/CYP2E1/<br>CYP3A4/CYP3A4/<br>CYP3A5/UGT2B7/<br>HSD17B6/HSD17B6                                            | 10    |
| hsa00982 | Drug metabolism - cytochrome P450            | 10/43     | 2.63E-11 | CYP1A2/CYP2B6/<br>CYP2C9/CYP2C9/<br>CYP2E1/CYP3A4/<br>CYP3A4/CYP3A5/<br>AOX1/UGT2B7                                                | 10    |

|          |                                            |       |          |                                                                                       |    |
|----------|--------------------------------------------|-------|----------|---------------------------------------------------------------------------------------|----|
| hsa00590 | Arachidonic acid metabolism                | 9/43  | 3.38E-11 | CYP2B6/CYP2C9/<br>CYP2C9/CYP2E1/<br>CYP2J2/CYP4A11/<br>CYP4F3/CYP4F3/<br>CYP4F2       | 9  |
| hsa05204 | Chemical carcinogenesis                    | 10/43 | 6.81E-11 | CYP1A1/CYP1A1/<br>CYP1A2/CYP2C9/<br>CYP2C9/CYP2E1/<br>CYP3A4/CYP3A4/<br>CYP3A5/UGT2B7 | 10 |
| hsa00380 | Tryptophan metabolism                      | 8/43  | 7.12E-11 | CYP1A1/CYP1A1/<br>CYP1A2/EHHAD<br>H/ALDH2/AOX1/<br>KMO/KMO                            | 8  |
| hsa00591 | Linoleic acid metabolism                   | 7/43  | 9.96E-11 | CYP1A2/CYP2C9/<br>CYP2C9/CYP2E1/<br>CYP2J2/CYP3A4/<br>CYP3A4                          | 7  |
| hsa03320 | PPAR signaling pathway                     | 7/43  | 6.36E-07 | EHHADH/APOA1/<br>APOA1/APOC3/A<br>POC3/ACOX1/AC<br>OX2                                | 7  |
| hsa00071 | Fatty acid degradation                     | 5/43  | 1.30E-05 | CYP4A11/EHHAD<br>H/ALDH2/ACADV<br>L/ACOX1                                             | 5  |
| hsa00280 | Valine, leucine and isoleucine degradation | 5/43  | 1.59E-05 | EHHADH/ALDH2/<br>AOX1/ALDH6A1/<br>ALDH6A1                                             | 5  |
| hsa00410 | beta-Alanine metabolism                    | 4/43  | 4.23E-05 | EHHADH/ALDH2/<br>ALDH6A1/ALDH6<br>A1                                                  | 4  |
| hsa00640 | Propanoate metabolism                      | 4/43  | 6.88E-05 | EHHADH/ACACB<br>/ALDH6A1/ALDH<br>6A1                                                  | 4  |



| hsa04976              | Bile secretion                       | 5/43      | 0.000110013 | SLCO1B1/SLCO1B1/SLCO1B1/CYP3A4/CYP3A4                                                     | 5     |
|-----------------------|--------------------------------------|-----------|-------------|-------------------------------------------------------------------------------------------|-------|
| hsa00860              | Porphyrin and chlorophyll metabolism | 3/43      | 0.002234985 | CP/CP/UGT2B7                                                                              | 3     |
| hsa00983              | Drug metabolism - other enzymes      | 3/43      | 0.003177045 | CYP3A4/CYP3A4/UGT2B7                                                                      | 3     |
| hsa01212              | Fatty acid metabolism                | 3/43      | 0.004654575 | EHHADH/ACADVL/ACOX1                                                                       | 3     |
| hsa04913              | Ovarian steroidogenesis              | 3/43      | 0.00516634  | CYP1A1/CYP1A1/CYP2J2                                                                      | 3     |
| hsa04977              | Vitamin digestion and absorption     | 2/43      | 0.008240724 | APOA1/APOA1                                                                               | 2     |
| hsa00053              | Ascorbate and aldarate metabolism    | 2/43      | 0.010354129 | ALDH2/UGT2B7                                                                              | 2     |
| hsa04146              | Peroxisome                           | 3/43      | 0.013060953 | EHHADH/ACOX1/ACOX2                                                                        | 3     |
| hsa04918              | Thyroid hormone synthesis            | 3/43      | 0.013368099 | SERPINA7/TTR/TR                                                                           | 3     |
| hsa05143              | African trypanosomiasis              | 2/43      | 0.017245334 | APOA1/APOA1                                                                               | 2     |
| <b>KEGG-cluster3</b>  |                                      |           |             |                                                                                           |       |
| ID                    | Description                          | BgRatio   | pvalue      | geneID                                                                                    | Count |
| hsa04978              | Mineral absorption                   | 73/10009  | 2.24E-22    | MT1E/MT1F/MT1G/MT1H/MT1H/MT1M/MT1M/MT1X/MT1X/MT2A                                         | 10    |
| <b>GO_BP_cluster1</b> |                                      |           |             |                                                                                           |       |
| ID                    | Description                          | GeneRatio | pvalue      | geneID                                                                                    | Count |
| GO:0002576            | platelet degranulation               | 16/32     | 1.42E-27    | ITIH4/HRG/ALB/SERPINA4/IGF1/PROS1/SERPINF2/PLG/CDC37L1/FGB/F8/FGA/A1BG/SERPING1/SPP2/ECM1 | 16    |

|            |                                          |       |          |                                                                                           |    |
|------------|------------------------------------------|-------|----------|-------------------------------------------------------------------------------------------|----|
| GO:0045055 | regulated exocytosis                     | 16/32 | 8.68E-21 | ITIH4/HRG/ALB/SERPINA4/IGF1/PROS1/SERPINF2/PLG/CDC37L1/FGB/F8/FGA/A1BG/SERPING1/SPP2/ECM1 | 16 |
| GO:0006887 | exocytosis                               | 16/32 | 2.43E-18 | ITIH4/HRG/ALB/SERPINA4/IGF1/PROS1/SERPINF2/PLG/CDC37L1/FGB/F8/FGA/A1BG/SERPING1/SPP2/ECM1 | 16 |
| GO:0006631 | fatty acid metabolic process             | 15/32 | 2.77E-17 | ACADS/ECHDC2/ACSL5/CRYL1/ACADM/ACSM2A/ACSM5/MUT/ACAA1/ACSL1/ACSM3/ACAT1/GCDH/ACADL/ACADSB | 15 |
| GO:0042730 | fibrinolysis                             | 8/32  | 1.54E-16 | HRG/PROS1/SERPINF2/PLG/FGB/FGA/SERPING1/F2                                                | 8  |
| GO:0072329 | monocarboxylic acid catabolic process    | 10/32 | 4.01E-15 | ACADS/ECHDC2/CRYL1/ACADM/MUT/ACAA1/ACAT1/GCDH/ACADL/ACADSB                                | 10 |
| GO:0030195 | negative regulation of blood coagulation | 8/32  | 2.13E-14 | HRG/PROS1/SERPINF2/PLG/FGB/FGA/SERPING1/F2                                                | 8  |
| GO:1900047 | negative regulation of hemostasis        | 8/32  | 2.13E-14 | HRG/PROS1/SERPINF2/PLG/FGB/FGA/SERPING1/F2                                                | 8  |

|            |                                             |       |          |                                                                            |    |
|------------|---------------------------------------------|-------|----------|----------------------------------------------------------------------------|----|
| GO:0050819 | negative regulation of coagulation          | 8/32  | 3.62E-14 | HRG/PROS1/SERP<br>INF2/PLG/FGB/FG<br>A/SERPING1/F2                         | 8  |
| GO:0009062 | fatty acid catabolic process                | 9/32  | 5.90E-14 | ACADS/ECHDC2/<br>ACADM/MUT/AC<br>AA1/ACAT1/GCD<br>H/ACADL/ACADS<br>B       | 9  |
| GO:0061045 | negative regulation of wound healing        | 8/32  | 1.70E-13 | HRG/PROS1/SERP<br>INF2/PLG/FGB/FG<br>A/SERPING1/F2                         | 8  |
| GO:1903035 | negative regulation of response to wounding | 8/32  | 4.87E-13 | HRG/PROS1/SERP<br>INF2/PLG/FGB/FG<br>A/SERPING1/F2                         | 8  |
| GO:0006635 | fatty acid beta-oxidation                   | 8/32  | 6.98E-13 | ACADS/ECHDC2/<br>ACADM/ACAA1/<br>ACAT1/GCDH/AC<br>ADL/ACADSB               | 8  |
| GO:0046395 | carboxylic acid catabolic process           | 10/32 | 1.96E-12 | ACADS/ECHDC2/<br>CRYL1/ACADM/<br>MUT/ACAA1/AC<br>AT1/GCDH/ACAD<br>L/ACADSB | 10 |
| GO:0030193 | regulation of blood coagulation             | 8/32  | 2.81E-12 | HRG/PROS1/SERP<br>INF2/PLG/FGB/FG<br>A/SERPING1/F2                         | 8  |
| GO:1900046 | regulation of hemostasis                    | 8/32  | 2.81E-12 | HRG/PROS1/SERP<br>INF2/PLG/FGB/FG<br>A/SERPING1/F2                         | 8  |
| GO:0050818 | regulation of coagulation                   | 8/32  | 4.13E-12 | HRG/PROS1/SERP<br>INF2/PLG/FGB/FG<br>A/SERPING1/F2                         | 8  |
| GO:0016054 | organic acid catabolic process              | 10/32 | 6.83E-12 | ACADS/ECHDC2/<br>CRYL1/ACADM/<br>MUT/ACAA1/AC<br>AT1/GCDH/ACAD<br>L/ACADSB | 10 |

|            |                                                        |       |          |                                                                            |    |
|------------|--------------------------------------------------------|-------|----------|----------------------------------------------------------------------------|----|
| GO:0019395 | fatty acid oxidation                                   | 8/32  | 9.18E-12 | ACADS/ECHDC2/<br>ACADM/ACAA1/<br>ACAT1/GCDH/AC<br>ADL/ACADSB               | 8  |
| GO:0034440 | lipid oxidation                                        | 8/32  | 1.08E-11 | ACADS/ECHDC2/<br>ACADM/ACAA1/<br>ACAT1/GCDH/AC<br>ADL/ACADSB               | 8  |
| GO:0044242 | cellular lipid catabolic process                       | 9/32  | 4.29E-11 | ACADS/ECHDC2/<br>ACADM/MUT/AC<br>AA1/ACAT1/GCD<br>H/ACADL/ACADS<br>B       | 9  |
| GO:0061041 | regulation of wound healing                            | 8/32  | 6.75E-11 | HRG/PROS1/SERP<br>INF2/PLG/FGB/FG<br>A/SERPING1/F2                         | 8  |
| GO:1903034 | regulation of response to wounding                     | 8/32  | 2.13E-10 | HRG/PROS1/SERP<br>INF2/PLG/FGB/FG<br>A/SERPING1/F2                         | 8  |
| GO:0033539 | fatty acid beta-oxidation using acyl-CoA dehydrogenase | 5/32  | 2.14E-10 | ACADS/ACADM/<br>GCDH/ACADL/A<br>CADSB                                      | 5  |
| GO:0044282 | small molecule catabolic process                       | 10/32 | 4.09E-10 | ACADS/ECHDC2/<br>CRYL1/ACADM/<br>MUT/ACAA1/AC<br>AT1/GCDH/ACAD<br>L/ACADSB | 10 |
| GO:0072378 | blood coagulation, fibrin clot formation               | 5/32  | 1.20E-09 | FGB/F8/FGA/SER<br>PING1/F2                                                 | 5  |
| GO:0051918 | negative regulation of fibrinolysis                    | 4/32  | 2.33E-09 | HRG/SERPINF2/P<br>LG/F2                                                    | 4  |
| GO:0016042 | lipid catabolic process                                | 9/32  | 2.54E-09 | ACADS/ECHDC2/<br>ACADM/MUT/AC<br>AA1/ACAT1/GCD<br>H/ACADL/ACADS<br>B       | 9  |

|            |                                                         |      |          |                                                                    |   |
|------------|---------------------------------------------------------|------|----------|--------------------------------------------------------------------|---|
| GO:0055088 | lipid homeostasis                                       | 7/32 | 2.89E-09 | ACADS/ACADM/<br>ACSM2A/ACSM3/<br>GCDH/ACADL/A<br>CADSB             | 7 |
| GO:0045861 | negative regulation of<br>proteolysis                   | 9/32 | 3.52E-09 | ITIH4/HRG/SERP<br>NA4/PROS1/SERP<br>INF2/SERPING1/F<br>2/SPP2/ECM1 | 9 |
| GO:0051917 | regulation of fibrinolysis                              | 4/32 | 1.10E-08 | HRG/SERPINF2/P<br>LG/F2                                            | 4 |
| GO:0007596 | blood coagulation                                       | 9/32 | 1.31E-08 | HRG/PROS1/SERP<br>INF2/PLG/FGB/F8/<br>FGA/SERPING1/F<br>2          | 9 |
| GO:0010466 | negative regulation of peptidase<br>activity            | 8/32 | 1.37E-08 | ITIH4/HRG/SERP<br>NA4/PROS1/SERP<br>INF2/SERPING1/S<br>PP2/ECM1    | 8 |
| GO:0050817 | coagulation                                             | 9/32 | 1.45E-08 | HRG/PROS1/SERP<br>INF2/PLG/FGB/F8/<br>FGA/SERPING1/F<br>2          | 9 |
| GO:0007599 | hemostasis                                              | 9/32 | 1.48E-08 | HRG/PROS1/SERP<br>INF2/PLG/FGB/F8/<br>FGA/SERPING1/F<br>2          | 9 |
| GO:0032102 | negative regulation of response<br>to external stimulus | 8/32 | 2.18E-08 | HRG/PROS1/SERP<br>INF2/PLG/FGB/FG<br>A/SERPING1/F2                 | 8 |
| GO:0030258 | lipid modification                                      | 8/32 | 2.54E-08 | ACADS/ECHDC2/<br>ACADM/ACAA1/<br>ACAT1/GCDH/AC<br>ADL/ACADSB       | 8 |
| GO:0072376 | protein activation cascade                              | 6/32 | 5.08E-08 | PROS1/FGB/F8/FG<br>A/SERPING1/F2                                   | 6 |
| GO:0030194 | positive regulation of blood<br>coagulation             | 4/32 | 1.37E-07 | HRG/SERPINF2/P<br>LG/F2                                            | 4 |

|            |                                               |      |          |                                                      |   |
|------------|-----------------------------------------------|------|----------|------------------------------------------------------|---|
| GO:1900048 | positive regulation of hemostasis             | 4/32 | 1.37E-07 | HRG/SERPINF2/PLG/F2                                  | 4 |
| GO:0050820 | positive regulation of coagulation            | 4/32 | 1.62E-07 | HRG/SERPINF2/PLG/F2                                  | 4 |
| GO:0002526 | acute inflammatory response                   | 6/32 | 1.68E-07 | ITIH4/PROS1/SERPINF2/F8/SERPING1/F2                  | 6 |
| GO:0010951 | negative regulation of endopeptidase activity | 7/32 | 2.24E-07 | ITIH4/HRG/SERPINA4/PROS1/SERPINF2/SERPING1/SPP2      | 7 |
| GO:0050878 | regulation of body fluid levels               | 9/32 | 2.54E-07 | HRG/PROS1/SERPINF2/PLG/FGB/F8/FGA/SERPING1/F2        | 9 |
| GO:0052547 | regulation of peptidase activity              | 8/32 | 4.97E-07 | ITIH4/HRG/SERPINA4/PROS1/SERPINF2/SERPING1/SPP2/ECM1 | 8 |
| GO:0051346 | negative regulation of hydrolase activity     | 8/32 | 5.80E-07 | ITIH4/HRG/SERPINA4/PROS1/SERPINF2/SERPING1/SPP2/ECM1 | 8 |
| GO:0006637 | acyl-CoA metabolic process                    | 5/32 | 8.21E-07 | ACSL5/ACSM2A/ACSL1/ACAT1/GCDH                        | 5 |
| GO:0035383 | thioester metabolic process                   | 5/32 | 8.21E-07 | ACSL5/ACSM2A/ACSL1/ACAT1/GCDH                        | 5 |
| GO:0006953 | acute-phase response                          | 4/32 | 1.88E-06 | ITIH4/SERPINF2/F8/F2                                 | 4 |
| GO:0090303 | positive regulation of wound healing          | 4/32 | 1.88E-06 | HRG/SERPINF2/PLG/F2                                  | 4 |
| GO:0035337 | fatty-acyl-CoA metabolic process              | 4/32 | 2.23E-06 | ACSL5/ACSM2A/ACSL1/GCDH                              | 4 |
| GO:1903036 | positive regulation of response to wounding   | 4/32 | 3.06E-06 | HRG/SERPINF2/PLG/F2                                  | 4 |
| GO:0052548 | regulation of endopeptidase activity          | 7/32 | 4.61E-06 | ITIH4/HRG/SERPINA4/PROS1/SERPINF2/SERPING1/SPP2      | 7 |

|            |                                                          |      |             |                                            |   |
|------------|----------------------------------------------------------|------|-------------|--------------------------------------------|---|
| GO:0016485 | protein processing                                       | 6/32 | 4.67E-06    | PROS1/SERPINF2/<br>FGB/FGA/SERPIN<br>G1/F2 | 6 |
| GO:0007597 | blood coagulation, intrinsic<br>pathway                  | 3/32 | 6.10E-06    | F8/SERPING1/F2                             | 3 |
| GO:0031639 | plasminogen activation                                   | 3/32 | 6.10E-06    | SERPINF2/FGB/F<br>GA                       | 3 |
| GO:0035384 | thioester biosynthetic process                           | 4/32 | 6.55E-06    | ACSL5/ACSL1/AC<br>AT1/GCDH                 | 4 |
| GO:0071616 | acyl-CoA biosynthetic process                            | 4/32 | 6.55E-06    | ACSL5/ACSL1/AC<br>AT1/GCDH                 | 4 |
| GO:0051604 | protein maturation                                       | 6/32 | 8.75E-06    | PROS1/SERPINF2/<br>FGB/FGA/SERPIN<br>G1/F2 | 6 |
| GO:0030168 | platelet activation                                      | 5/32 | 1.29E-05    | HRG/FGB/F8/FGA<br>/F2                      | 5 |
| GO:0006732 | coenzyme metabolic process                               | 6/32 | 1.94E-05    | ACSL5/ACSM2A/I<br>GF1/ACSL1/ACAT<br>1/GCDH | 6 |
| GO:0001676 | long-chain fatty acid metabolic<br>process               | 4/32 | 2.43E-05    | ACSL5/ACAA1/A<br>CSL1/ACADL                | 4 |
| GO:0031638 | zymogen activation                                       | 3/32 | 4.77E-05    | SERPINF2/FGB/F<br>GA                       | 3 |
| GO:0006790 | sulfur compound metabolic<br>process                     | 6/32 | 5.07E-05    | ACSL5/ACSM2A/<br>MUT/ACSL1/ACA<br>T1/GCDH  | 6 |
| GO:0051186 | cofactor metabolic process                               | 6/32 | 6.19E-05    | ACSL5/ACSM2A/I<br>GF1/ACSL1/ACAT<br>1/GCDH | 6 |
| GO:0046949 | fatty-acyl-CoA biosynthetic<br>process                   | 3/32 | 7.52E-05    | ACSL5/ACSL1/GC<br>DH                       | 3 |
| GO:0009108 | coenzyme biosynthetic process                            | 4/32 | 0.000134981 | ACSL5/ACSL1/AC<br>AT1/GCDH                 | 4 |
| GO:0017187 | peptidyl-glutamic acid                                   | 2/32 | 0.000194194 | PROS1/F2                                   | 2 |
| GO:0018214 | protein carboxylation                                    | 2/32 | 0.000194194 | PROS1/F2                                   | 2 |
| GO:0034116 | positive regulation of<br>heterotypic cell-cell adhesion | 2/32 | 0.000194194 | FGB/FGA                                    | 2 |
| GO:2000047 | regulation of cell-cell adhesion<br>mediated by cadherin | 2/32 | 0.000194194 | SERPINF2/PLG                               | 2 |
| GO:0009437 | carnitine metabolic process                              | 2/32 | 0.000274742 | ACADM/ACADL                                | 2 |
| GO:0036109 | alpha-linolenic acid metabolic<br>process                | 2/32 | 0.000274742 | ACAA1/ACSL1                                | 2 |
| GO:0046459 | short-chain fatty acid metabolic<br>process              | 2/32 | 0.000320148 | ACADS/MUT                                  | 2 |

|            |                                                              |      |             |                           |   |
|------------|--------------------------------------------------------------|------|-------------|---------------------------|---|
| GO:0010810 | regulation of cell-substrate adhesion                        | 4/32 | 0.000328036 | HRG/PLG/FGB/FGA           | 4 |
| GO:0051188 | cofactor biosynthetic process                                | 4/32 | 0.000350046 | ACSL5/ACSL1/ACAT1/GCDH    | 4 |
| GO:0044331 | cell-cell adhesion mediated by cadherin                      | 2/32 | 0.000368959 | SERPINF2/PLG              | 2 |
| GO:0006577 | amino-acid betaine metabolic process                         | 2/32 | 0.000476745 | ACADM/ACADL               | 2 |
| GO:0070613 | regulation of protein processing                             | 3/32 | 0.000477323 | PROS1/SERPINF2/SERPING1   | 3 |
| GO:1903317 | regulation of protein maturation                             | 3/32 | 0.000495037 | PROS1/SERPINF2/SERPING1   | 3 |
| GO:0034114 | regulation of heterotypic cell-cell adhesion                 | 2/32 | 0.000535696 | FGB/FGA                   | 2 |
| GO:0006959 | humoral immune response                                      | 4/32 | 0.000565981 | PROS1/FGB/FGA/SERPING1    | 4 |
| GO:0044272 | sulfur compound biosynthetic process                         | 4/32 | 0.000565981 | ACSL5/ACSL1/ACAT1/GCDH    | 4 |
| GO:0009083 | branched-chain amino acid catabolic process                  | 2/32 | 0.000598002 | ACAT1/ACADSB              | 2 |
| GO:0045785 | positive regulation of cell adhesion                         | 5/32 | 0.000652073 | HRG/IGF1/SERPINF2/FGB/FGA | 5 |
| GO:0022407 | regulation of cell-cell adhesion                             | 5/32 | 0.000684469 | IGF1/SERPINF2/PLG/FGB/FGA | 5 |
| GO:0032967 | positive regulation of collagen biosynthetic process         | 2/32 | 0.000732631 | SERPINF2/F2               | 2 |
| GO:0009081 | branched-chain amino acid metabolic process                  | 2/32 | 0.000804929 | ACAT1/ACADSB              | 2 |
| GO:0010714 | positive regulation of collagen metabolic process            | 2/32 | 0.000804929 | SERPINF2/F2               | 2 |
| GO:0044253 | positive regulation of multicellular organismal              | 2/32 | 0.000804929 | SERPINF2/F2               | 2 |
| GO:2001237 | negative regulation of extrinsic apoptotic signaling pathway | 3/32 | 0.000942089 | IGF1/FGB/FGA              | 3 |
| GO:0010811 | positive regulation of cell-substrate adhesion               | 3/32 | 0.000969376 | HRG/FGB/FGA               | 3 |
| GO:0006465 | signal peptide processing                                    | 2/32 | 0.001041613 | PROS1/F2                  | 2 |
| GO:0022409 | positive regulation of cell-cell adhesion                    | 4/32 | 0.001080294 | IGF1/SERPINF2/FGB/FGA     | 4 |
| GO:2000352 | negative regulation of endothelial cell apoptotic            | 2/32 | 0.001127063 | FGB/FGA                   | 2 |
| GO:0070371 | ERK1 and ERK2 cascade                                        | 4/32 | 0.001294729 | IGF1/SERPINF2/FGB/FGA     | 4 |



|            |                                                                                         |      |             |                                 |   |
|------------|-----------------------------------------------------------------------------------------|------|-------------|---------------------------------|---|
| GO:0032965 | regulation of collagen biosynthetic process                                             | 2/32 | 0.001307726 | SERPINF2/F2                     | 2 |
| GO:0032103 | positive regulation of response to external stimulus                                    | 4/32 | 0.00149493  | HRG/SERPINF2/PLG/F2             | 4 |
| GO:0010543 | regulation of platelet activation                                                       | 2/32 | 0.001501324 | HRG/F2                          | 2 |
| GO:0018200 | peptidyl-glutamic acid                                                                  | 2/32 | 0.001501324 | PROS1/F2                        | 2 |
| GO:0030449 | regulation of complement activation                                                     | 2/32 | 0.001602943 | PROS1/SERPING1                  | 2 |
| GO:0045907 | positive regulation of vasoconstriction                                                 | 2/32 | 0.001602943 | FGB/FGA                         | 2 |
| GO:0010955 | negative regulation of protein processing                                               | 2/32 | 0.001707761 | SERPINF2/SERPING1               | 2 |
| GO:1900026 | positive regulation of substrate adhesion-dependent cell                                | 2/32 | 0.001707761 | FGB/FGA                         | 2 |
| GO:1903318 | negative regulation of protein maturation                                               | 2/32 | 0.001707761 | SERPINF2/SERPING1               | 2 |
| GO:2000257 | regulation of protein activation cascade                                                | 2/32 | 0.001707761 | PROS1/SERPING1                  | 2 |
| GO:0010712 | regulation of collagen metabolic process                                                | 2/32 | 0.001815765 | SERPINF2/F2                     | 2 |
| GO:0032964 | collagen biosynthetic process                                                           | 2/32 | 0.001926943 | SERPINF2/F2                     | 2 |
| GO:0044246 | regulation of multicellular organismal metabolic process                                | 2/32 | 0.001926943 | SERPINF2/F2                     | 2 |
| GO:1902042 | negative regulation of extrinsic apoptotic signaling pathway via death domain receptors | 2/32 | 0.001926943 | FGB/FGA                         | 2 |
| GO:0050880 | regulation of blood vessel size                                                         | 3/32 | 0.002034361 | SERPINF2/FGB/FGA                | 3 |
| GO:1904036 | negative regulation of epithelial cell apoptotic process                                | 2/32 | 0.002041284 | FGB/FGA                         | 2 |
| GO:0035150 | regulation of tube size                                                                 | 3/32 | 0.002078607 | SERPINF2/FGB/FGA                | 3 |
| GO:0008015 | blood circulation                                                                       | 5/32 | 0.002127417 | SERPINF2/FGB/FGA/ACSM3/SERPING1 | 5 |
| GO:0003013 | circulatory system process                                                              | 5/32 | 0.002205172 | SERPINF2/FGB/FGA/ACSM3/SERPING1 | 5 |
| GO:0048771 | tissue remodeling                                                                       | 3/32 | 0.002504011 | HRG/PLG/SPP2                    | 3 |
| GO:0031589 | cell-substrate adhesion                                                                 | 4/32 | 0.002513995 | HRG/PLG/FGB/FGA                 | 4 |
| GO:2000351 | regulation of endothelial cell apoptotic process                                        | 2/32 | 0.002530037 | FGB/FGA                         | 2 |
| GO:0035338 | long-chain fatty-acyl-CoA biosynthetic process                                          | 2/32 | 0.002929234 | ACSL5/ACSL1                     | 2 |

|            |                                                                                |      |             |                         |   |
|------------|--------------------------------------------------------------------------------|------|-------------|-------------------------|---|
| GO:2001236 | regulation of extrinsic apoptotic signaling pathway                            | 3/32 | 0.003149876 | IGF1/FGB/FGA            | 3 |
| GO:0003018 | vascular process in circulatory system                                         | 3/32 | 0.00320788  | SERPINF2/FGB/FGA        | 3 |
| GO:0072577 | endothelial cell apoptotic                                                     | 2/32 | 0.003356054 | FGB/FGA                 | 2 |
| GO:0030198 | extracellular matrix organization                                              | 4/32 | 0.003499754 | SERPINF2/PLG/FGB/FGA    | 4 |
| GO:0034113 | heterotypic cell-cell adhesion                                                 | 2/32 | 0.003504411 | FGB/FGA                 | 2 |
| GO:0035336 | long-chain fatty-acyl-CoA metabolic process                                    | 2/32 | 0.003504411 | ACSL5/ACSL1             | 2 |
| GO:1900024 | regulation of substrate adhesion-dependent cell spreading                      | 2/32 | 0.003504411 | FGB/FGA                 | 2 |
| GO:0043062 | extracellular structure organization                                           | 4/32 | 0.003537819 | SERPINF2/PLG/FGB/FGA    | 4 |
| GO:0019731 | antibacterial humoral response                                                 | 2/32 | 0.003810185 | FGB/FGA                 | 2 |
| GO:0002920 | regulation of humoral immune response                                          | 2/32 | 0.00412796  | PROS1/SERPING1          | 2 |
| GO:0070374 | positive regulation of ERK1 and ERK2 cascade                                   | 3/32 | 0.004157871 | SERPINF2/FGB/FGA        | 3 |
| GO:1901565 | organonitrogen compound catabolic process                                      | 4/32 | 0.004315876 | ACAT1/GCDH/ACADL/ACADSB | 4 |
| GO:0006888 | ER to Golgi vesicle-mediated transport                                         | 3/32 | 0.004366242 | PROS1/F8/F2             | 3 |
| GO:0019730 | antimicrobial humoral response                                                 | 2/32 | 0.004799153 | FGB/FGA                 | 2 |
| GO:1902041 | regulation of extrinsic apoptotic signaling pathway via death domain receptors | 2/32 | 0.004974312 | FGB/FGA                 | 2 |
| GO:0070527 | platelet aggregation                                                           | 2/32 | 0.005152391 | FGB/FGA                 | 2 |
| GO:0019229 | regulation of vasoconstriction                                                 | 2/32 | 0.005517271 | FGB/FGA                 | 2 |
| GO:1901605 | alpha-amino acid metabolic process                                             | 3/32 | 0.00574986  | MUT/ACAT1/GCDH          | 3 |
| GO:0007160 | cell-matrix adhesion                                                           | 3/32 | 0.005918008 | HRG/FGB/FGA             | 3 |
| GO:1904035 | regulation of epithelial cell apoptotic process                                | 2/32 | 0.006281602 | FGB/FGA                 | 2 |
| GO:0014068 | positive regulation of phosphatidylinositol 3-kinase signaling                 | 2/32 | 0.006680876 | IGF1/F2                 | 2 |
| GO:2001234 | negative regulation of apoptotic signaling pathway                             | 3/32 | 0.006895668 | IGF1/FGB/FGA            | 3 |
| GO:0050714 | positive regulation of protein secretion                                       | 3/32 | 0.00708314  | IGF1/FGB/FGA            | 3 |

GO\_BP\_clsuter2

| ID | Description | GeneRatio | pvalue | geneID | Count |
|----|-------------|-----------|--------|--------|-------|
|----|-------------|-----------|--------|--------|-------|

|            |                              |       |          |                                                                                                                                         |    |
|------------|------------------------------|-------|----------|-----------------------------------------------------------------------------------------------------------------------------------------|----|
| GO:0008202 | steroid metabolic process    | 15/35 | 2.69E-18 | GC/SLCO1B1/AC<br>ADVL/CYP2E1/H<br>SD17B6/CYP1A1/<br>ACOX2/CYP2C9/<br>UGT2B7/CYP3A4/<br>NR1I2/CYP1A2/A<br>POA1/CYP2B6/CY<br>P3A5         | 15 |
| GO:0006631 | fatty acid metabolic process | 16/35 | 3.93E-18 | CYP4F3/CYP2J2/A<br>CADVL/CYP2E1/<br>CYP1A1/ACOX2/<br>CYP2C9/CYP4F2/<br>APOC3/CYP1A2/A<br>POA1/CYP4A11/C<br>YP2B6/ACOX1/A<br>CACB/EHHADH | 16 |
| GO:0019373 | epoxygenase P450 pathway     | 8/35  | 6.87E-18 | CYP2J2/CYP2E1/C<br>YP1A1/CYP2C9/C<br>YP4F2/CYP1A2/C<br>YP4A11/CYP2B6                                                                    | 8  |
| GO:0017144 | drug metabolic process       | 9/35  | 9.62E-18 | CYP2E1/CYP1A1/<br>CYP2C9/CYP3A4/<br>CYP4F2/NR1I2/C<br>YP1A2/CYP2B6/C<br>YP3A5                                                           | 9  |
| GO:0006805 | xenobiotic metabolic process | 10/35 | 3.62E-15 | CYP2J2/CYP2E1/C<br>YP1A1/CYP2C9/C<br>YP3A4/NR1I2/CY<br>P1A2/CYP26A1/C<br>YP2B6/CYP3A5                                                   | 10 |
| GO:0006690 | icosanoid metabolic process  | 10/35 | 5.00E-15 | CYP4F3/CYP2J2/C<br>YP2E1/CYP1A1/C<br>YP2C9/CYP4F2/C<br>YP1A2/CYP4A11/<br>CYP2B6/ACOX1                                                   | 10 |

|            |                                          |       |          |                                                                                                                 |    |
|------------|------------------------------------------|-------|----------|-----------------------------------------------------------------------------------------------------------------|----|
| GO:0071466 | cellular response to xenobiotic stimulus | 10/35 | 5.55E-15 | CYP2J2/CYP2E1/C<br>YP1A1/CYP2C9/C<br>YP3A4/NR1I2/CY<br>P1A2/CYP26A1/C<br>YP2B6/CYP3A5                           | 10 |
| GO:0016042 | lipid catabolic process                  | 13/35 | 1.07E-14 | CYP4F3/ACADVL<br>/ACOX2/CYP3A4/<br>CYP4F2/APOC3/C<br>YP1A2/APOA1/C<br>YP26A1/CYP4A11<br>/ACOX1/ACACB/<br>EHHADH | 13 |
| GO:0006721 | terpenoid metabolic process              | 10/35 | 1.12E-14 | CYP2E1/CYP1A1/<br>CYP2C9/CYP3A4/<br>TTR/APOC3/CYP1<br>A2/APOA1/CYP26<br>A1/ALDH8A1                              | 10 |
| GO:0009410 | response to xenobiotic stimulus          | 10/35 | 1.24E-14 | CYP2J2/CYP2E1/C<br>YP1A1/CYP2C9/C<br>YP3A4/NR1I2/CY<br>P1A2/CYP26A1/C<br>YP2B6/CYP3A5                           | 10 |
| GO:0033559 | unsaturated fatty acid metabolic process | 10/35 | 2.17E-14 | CYP4F3/CYP2J2/C<br>YP2E1/CYP1A1/C<br>YP2C9/CYP4F2/C<br>YP1A2/CYP4A11/<br>CYP2B6/ACOX1                           | 10 |
| GO:0019369 | arachidonic acid metabolic process       | 8/35  | 5.67E-14 | CYP2J2/CYP2E1/C<br>YP1A1/CYP2C9/C<br>YP4F2/CYP1A2/C<br>YP4A11/CYP2B6                                            | 8  |

|            |                                         |       |          |                                                                                                                |    |
|------------|-----------------------------------------|-------|----------|----------------------------------------------------------------------------------------------------------------|----|
| GO:0044282 | small molecule catabolic process        | 13/35 | 6.85E-14 | CYP4F3/ACADVL<br>/ALDH2/CYP1A1/<br>ACOX2/CYP4F2/C<br>YP26A1/CYP4A11<br>/ACOX1/ACACB/<br>KMO/EHHADH/A<br>LDH6A1 | 13 |
| GO:0006720 | isoprenoid metabolic process            | 10/35 | 7.77E-14 | CYP2E1/CYP1A1/<br>CYP2C9/CYP3A4/<br>TTR/APOC3/CYP1<br>A2/APOA1/CYP26<br>A1/ALDH8A1                             | 10 |
| GO:0001676 | long-chain fatty acid metabolic process | 9/35  | 1.47E-13 | CYP2J2/CYP2E1/C<br>YP1A1/CYP2C9/C<br>YP4F2/CYP1A2/C<br>YP4A11/CYP2B6/<br>ACOX1                                 | 9  |
| GO:0042737 | drug catabolic process                  | 6/35  | 2.69E-13 | CYP2C9/CYP3A4/<br>NR1I2/CYP1A2/C<br>YP2B6/CYP3A5                                                               | 6  |
| GO:0016054 | organic acid catabolic process          | 11/35 | 5.46E-13 | CYP4F3/ACADVL<br>/ACOX2/CYP4F2/<br>CYP26A1/CYP4A1<br>1/ACOX1/ACACB/<br>KMO/EHHADH/A<br>LDH6A1                  | 11 |
| GO:0042738 | exogenous drug catabolic process        | 5/35  | 2.37E-11 | CYP2C9/CYP3A4/<br>NR1I2/CYP1A2/C<br>YP2B6                                                                      | 5  |
| GO:0006766 | vitamin metabolic process               | 8/35  | 2.31E-10 | GC/CYP1A1/CYP3<br>A4/CYP4F2/AOX1<br>/CYP26A1/ACAC<br>B/CYB5A                                                   | 8  |
| GO:0030258 | lipid modification                      | 9/35  | 2.52E-09 | ACADVL/CYP1A1<br>/ACOX2/CYP3A4/<br>APOA1/ACOX1/C<br>YP3A5/ACACB/E<br>HHADH                                     | 9  |

|            |                                               |       |          |                                                                               |    |
|------------|-----------------------------------------------|-------|----------|-------------------------------------------------------------------------------|----|
| GO:0044242 | cellular lipid catabolic process              | 8/35  | 3.30E-09 | ACADVL/ACOX2/<br>APOC3/APOA1/C<br>YP26A1/ACOX1/A<br>CACB/EHHADH               | 8  |
| GO:1901615 | organic hydroxy compound<br>metabolic process | 10/35 | 7.51E-09 | GC/CYP4F3/ACA<br>DVL/ALDH2/CYP<br>1A1/CYP3A4/TTR/<br>CYP4F2/APOA1/C<br>YP4A11 | 10 |
| GO:0070989 | oxidative demethylation                       | 4/35  | 2.18E-08 | CYP2C9/CYP3A4/<br>CYP1A2/CYP3A5                                               | 4  |
| GO:0006775 | fat-soluble vitamin metabolic<br>process      | 5/35  | 2.44E-08 | GC/CYP1A1/CYP3<br>A4/CYP4F2/CYP2<br>6A1                                       | 5  |
| GO:0001523 | retinoid metabolic process                    | 6/35  | 2.80E-08 | CYP1A1/TTR/APO<br>C3/APOA1/CYP26<br>A1/ALDH8A1                                | 6  |
| GO:0016101 | diterpenoid metabolic process                 | 6/35  | 4.41E-08 | CYP1A1/TTR/APO<br>C3/APOA1/CYP26<br>A1/ALDH8A1                                | 6  |
| GO:0016053 | organic acid biosynthetic<br>process          | 8/35  | 6.49E-08 | ACADVL/CYP1A1<br>/ACOX2/APOC3/A<br>POA1/ACACB/KM<br>O/ALDH8A1                 | 8  |
| GO:0072329 | monocarboxylic acid catabolic<br>process      | 6/35  | 8.00E-08 | ACADVL/ACOX2/<br>CYP26A1/ACOX1/<br>ACACB/EHHADH                               | 6  |
| GO:0034754 | cellular hormone metabolic<br>process         | 6/35  | 8.47E-08 | HSD17B6/UGT2B<br>7/CYP3A4/TTR/C<br>YP26A1/ALDH8A<br>1                         | 6  |
| GO:0042493 | response to drug                              | 9/35  | 9.18E-08 | CYP2E1/CYP1A1/<br>CYP2C9/CYP3A4/<br>NR1I2/CYP1A2/A<br>POA1/CYP2B6/AC<br>ACB   | 9  |

|            |                                         |      |          |                                                                          |   |
|------------|-----------------------------------------|------|----------|--------------------------------------------------------------------------|---|
| GO:0046395 | carboxylic acid catabolic process       | 7/35 | 1.37E-07 | ACADVL/ACOX2/<br>CYP26A1/ACOX1/<br>ACACB/EHHADH<br>/ALDH6A1              | 7 |
| GO:0070988 | demethylation                           | 5/35 | 1.40E-07 | CYP1A1/CYP2C9/<br>CYP3A4/CYP1A2/<br>CYP3A5                               | 5 |
| GO:0042180 | cellular ketone metabolic process       | 7/35 | 2.66E-07 | ACADVL/CYP4F2<br>/APOC3/APOA1/C<br>YP2B6/ACACB/K<br>MO                   | 7 |
| GO:0006635 | fatty acid beta-oxidation               | 5/35 | 3.57E-07 | ACADVL/ACOX2/<br>ACOX1/ACACB/E<br>HHADH                                  | 5 |
| GO:0044283 | small molecule biosynthetic process     | 9/35 | 4.57E-07 | ACADVL/CYP1A1<br>/ACOX2/CYP3A4/<br>APOC3/APOA1/A<br>CACB/KMO/ALD<br>H8A1 | 9 |
| GO:0009062 | fatty acid catabolic process            | 5/35 | 1.11E-06 | ACADVL/ACOX2/<br>ACOX1/ACACB/E<br>HHADH                                  | 5 |
| GO:1901568 | fatty acid derivative metabolic process | 3/35 | 1.38E-06 | CYP4F3/CYP4F2/<br>CYP4A11                                                | 3 |
| GO:0019395 | fatty acid oxidation                    | 5/35 | 1.70E-06 | ACADVL/ACOX2/<br>ACOX1/ACACB/E<br>HHADH                                  | 5 |
| GO:0042445 | hormone metabolic process               | 6/35 | 1.82E-06 | HSD17B6/UGT2B<br>7/CYP3A4/TTR/C<br>YP26A1/ALDH8A<br>1                    | 6 |
| GO:0034440 | lipid oxidation                         | 5/35 | 1.88E-06 | ACADVL/ACOX2/<br>ACOX1/ACACB/E<br>HHADH                                  | 5 |
| GO:0009820 | alkaloid metabolic process              | 3/35 | 3.04E-06 | CYP3A4/CYP1A2/<br>CYP3A5                                                 | 3 |

|            |                                                           |      |          |                                                                            |   |
|------------|-----------------------------------------------------------|------|----------|----------------------------------------------------------------------------|---|
| GO:0010817 | regulation of hormone levels                              | 8/35 | 3.86E-06 | SLCO1B1/HSD17<br>B6/UGT2B7/CYP3<br>A4/TTR/CYP26A1/<br>SERPINA7/ALDH<br>8A1 | 8 |
| GO:1901616 | organic hydroxy compound<br>catabolic process             | 4/35 | 4.43E-06 | CYP4F3/ALDH2/C<br>YP4F2/CYP4A11                                            | 4 |
| GO:0033539 | fatty acid beta-oxidation using<br>acyl-CoA dehydrogenase | 3/35 | 8.03E-06 | ACADVL/ACOX2/<br>ACOX1                                                     | 3 |
| GO:0042359 | vitamin D metabolic process                               | 3/35 | 9.43E-06 | GC/CYP1A1/CYP3<br>A4                                                       | 3 |
| GO:0046394 | carboxylic acid biosynthetic<br>process                   | 6/35 | 1.29E-05 | ACADVL/ACOX2/<br>APOC3/APOA1/A<br>CACB/KMO                                 | 6 |
| GO:0045922 | negative regulation of fatty acid<br>metabolic process    | 3/35 | 1.46E-05 | ACADVL/APOC3/<br>ACACB                                                     | 3 |
| GO:0019217 | regulation of fatty acid<br>metabolic process             | 4/35 | 2.08E-05 | ACADVL/APOC3/<br>APOA1/ACACB                                               | 4 |
| GO:0008209 | androgen metabolic process                                | 3/35 | 2.39E-05 | HSD17B6/UGT2B<br>7/CYP3A4                                                  | 3 |
| GO:0000038 | very long-chain fatty acid<br>metabolic process           | 3/35 | 2.98E-05 | ACADVL/CYP4F2<br>/ACOX1                                                    | 3 |
| GO:0006691 | leukotriene metabolic process                             | 3/35 | 2.98E-05 | CYP4F3/CYP4F2/<br>CYP4A11                                                  | 3 |
| GO:0072330 | monocarboxylic acid<br>biosynthetic process               | 5/35 | 3.46E-05 | ACADVL/ACOX2/<br>APOC3/APOA1/A<br>CACB                                     | 5 |
| GO:0032368 | regulation of lipid transport                             | 4/35 | 3.99E-05 | CYP4F2/APOC3/A<br>POA1/CYP4A11                                             | 4 |
| GO:0006869 | lipid transport                                           | 6/35 | 4.28E-05 | SLCO1B1/CYP4F2<br>/APOC3/APOA1/C<br>YP4A11/ACACB                           | 6 |
| GO:0042304 | regulation of fatty acid<br>biosynthetic process          | 3/35 | 4.85E-05 | ACADVL/APOC3/<br>APOA1                                                     | 3 |
| GO:0006778 | porphyrin-containing compound<br>metabolic process        | 3/35 | 5.77E-05 | CYP1A1/HPX/CY<br>P1A2                                                      | 3 |
| GO:0010876 | lipid localization                                        | 6/35 | 7.59E-05 | SLCO1B1/CYP4F2<br>/APOC3/APOA1/C<br>YP4A11/ACACB                           | 6 |



|            |                                                   |      |             |                                       |   |
|------------|---------------------------------------------------|------|-------------|---------------------------------------|---|
| GO:0051186 | cofactor metabolic process                        | 6/35 | 0.000104863 | CYP1A1/HPX/CYP4F2/CYP1A2/ACACB/KMO    | 6 |
| GO:0055088 | lipid homeostasis                                 | 4/35 | 0.00012375  | ACADVL/ACOX2/APOC3/APOA1              | 4 |
| GO:0050994 | regulation of lipid catabolic process             | 3/35 | 0.000174559 | APOC3/APOA1/CACB                      | 3 |
| GO:0015718 | monocarboxylic acid transport                     | 4/35 | 0.000187488 | SLCO1B1/CYP4F2/CYP4A11/ACACB          | 4 |
| GO:0009111 | vitamin catabolic process                         | 2/35 | 0.000190644 | CYP4F2/CYP26A1                        | 2 |
| GO:0006633 | fatty acid biosynthetic process                   | 4/35 | 0.000198216 | ACADVL/APOC3/APOA1/ACACB              | 4 |
| GO:0019748 | secondary metabolic process                       | 3/35 | 0.000229458 | CYP1A1/CYP1A2/KMO                     | 3 |
| GO:0033013 | tetrapyrrole metabolic process                    | 3/35 | 0.000229458 | CYP1A1/HPX/CYP1A2                     | 3 |
| GO:0016114 | terpenoid biosynthetic process                    | 2/35 | 0.000232702 | CYP1A1/ALDH8A1                        | 2 |
| GO:0034370 | triglyceride-rich lipoprotein particle remodeling | 2/35 | 0.000232702 | APOC3/APOA1                           | 2 |
| GO:0034372 | very-low-density lipoprotein particle remodeling  | 2/35 | 0.000232702 | APOC3/APOA1                           | 2 |
| GO:0050665 | hydrogen peroxide biosynthetic process            | 2/35 | 0.000232702 | CYP1A1/CYP1A2                         | 2 |
| GO:1901361 | organic cyclic compound catabolic process         | 6/35 | 0.000241537 | CYP1A1/CYP3A4/CYP1A2/AOX1/KMO/ALDH6A1 | 6 |
| GO:0010565 | regulation of cellular ketone metabolic process   | 4/35 | 0.000272118 | ACADVL/APOC3/APOA1/ACACB              | 4 |
| GO:0009404 | toxin metabolic process                           | 2/35 | 0.000278875 | CYP1A1/CYP1A2                         | 2 |
| GO:0010896 | regulation of triglyceride catabolic process      | 2/35 | 0.000278875 | APOC3/APOA1                           | 2 |
| GO:0006066 | alcohol metabolic process                         | 5/35 | 0.000286239 | ACADVL/ALDH2/CYP3A4/TTR/APOA1         | 5 |
| GO:0033540 | fatty acid beta-oxidation using acyl-CoA oxidase  | 2/35 | 0.000329145 | ACOX2/ACOX1                           | 2 |

|            |                                                             |      |             |                                        |   |
|------------|-------------------------------------------------------------|------|-------------|----------------------------------------|---|
| GO:0033700 | phospholipid efflux                                         | 2/35 | 0.000383496 | APOC3/APOA1                            | 2 |
| GO:0045717 | negative regulation of fatty acid biosynthetic process      | 2/35 | 0.000383496 | ACADVL/APOC3                           | 2 |
| GO:0032305 | positive regulation of icosanoid secretion                  | 2/35 | 0.000441913 | CYP4F2/CYP4A11                         | 2 |
| GO:0034375 | high-density lipoprotein particle remodeling                | 2/35 | 0.000441913 | APOC3/APOA1                            | 2 |
| GO:0051004 | regulation of lipoprotein lipase activity                   | 2/35 | 0.000441913 | APOC3/APOA1                            | 2 |
| GO:0060192 | negative regulation of lipase activity                      | 2/35 | 0.000441913 | APOC3/APOA1                            | 2 |
| GO:2000193 | positive regulation of fatty acid transport                 | 2/35 | 0.000504377 | CYP4F2/CYP4A11                         | 2 |
| GO:0045833 | negative regulation of lipid metabolic process              | 3/35 | 0.000516019 | ACADVL/APOC3/<br>ACACB                 | 3 |
| GO:0001977 | renal system process involved in regulation of blood volume | 2/35 | 0.000570875 | CYP4F2/CYP4A11                         | 2 |
| GO:0032303 | regulation of icosanoid secretion                           | 2/35 | 0.000570875 | CYP4F2/CYP4A11                         | 2 |
| GO:0043691 | reverse cholesterol transport                               | 2/35 | 0.000570875 | APOC3/APOA1                            | 2 |
| GO:0015908 | fatty acid transport                                        | 3/35 | 0.000744034 | CYP4F2/CYP4A11<br>/ACACB               | 3 |
| GO:1901565 | organonitrogen compound catabolic process                   | 5/35 | 0.000766373 | CYP3A4/AOX1/C<br>YP3A5/KMO/ALD<br>H6A1 | 5 |
| GO:0034377 | plasma lipoprotein particle assembly                        | 2/35 | 0.000794398 | APOC3/APOA1                            | 2 |
| GO:0042537 | benzene-containing compound metabolic process               | 2/35 | 0.000794398 | CYP2E1/KMO                             | 2 |
| GO:0006767 | water-soluble vitamin metabolic process                     | 3/35 | 0.00082309  | AOX1/ACACB/CY<br>B5A                   | 3 |
| GO:0006706 | steroid catabolic process                                   | 2/35 | 0.000876863 | CYP3A4/CYP1A2                          | 2 |
| GO:0042573 | retinoic acid metabolic process                             | 2/35 | 0.000876863 | CYP26A1/ALDH8<br>A1                    | 2 |
| GO:0035902 | response to immobilization stress                           | 2/35 | 0.000963279 | CYP1A1/CYP1A2                          | 2 |
| GO:0050995 | negative regulation of lipid catabolic process              | 2/35 | 0.000963279 | APOC3/ACACB                            | 2 |
| GO:0065005 | protein-lipid complex assembly                              | 2/35 | 0.000963279 | APOC3/APOA1                            | 2 |
| GO:0072337 | modified amino acid transport                               | 2/35 | 0.001053631 | SLCO1B1/SERPIN<br>A7                   | 2 |

|            |                                                                                 |      |             |                                |   |
|------------|---------------------------------------------------------------------------------|------|-------------|--------------------------------|---|
| GO:0003071 | renal system process involved in regulation of systemic arterial blood pressure | 2/35 | 0.001147902 | CYP4F2/CYP4A11                 | 2 |
| GO:0032369 | negative regulation of lipid transport                                          | 2/35 | 0.001147902 | CYP4F2/APOC3                   | 2 |
| GO:0034367 | macromolecular complex remodeling                                               | 2/35 | 0.001147902 | APOC3/APOA1                    | 2 |
| GO:0034368 | protein-lipid complex remodeling                                                | 2/35 | 0.001147902 | APOC3/APOA1                    | 2 |
| GO:0034369 | plasma lipoprotein particle remodeling                                          | 2/35 | 0.001147902 | APOC3/APOA1                    | 2 |
| GO:2000191 | regulation of fatty acid transport                                              | 2/35 | 0.001147902 | CYP4F2/CYP4A11                 | 2 |
| GO:0044550 | secondary metabolite biosynthetic process                                       | 2/35 | 0.001246078 | CYP1A2/KMO                     | 2 |
| GO:0006641 | triglyceride metabolic process                                                  | 3/35 | 0.001298264 | CYP2E1/APOC3/APOA1             | 3 |
| GO:0044270 | cellular nitrogen compound catabolic process                                    | 5/35 | 0.001437668 | CYP3A4/AOX1/CYP3A5/KMO/ALDH6A1 | 5 |
| GO:0008299 | isoprenoid biosynthetic process                                                 | 2/35 | 0.001454076 | CYP1A1/ALDH8A1                 | 2 |
| GO:0009812 | flavonoid metabolic process                                                     | 2/35 | 0.001454076 | CYP1A1/UGT2B7                  | 2 |
| GO:0046320 | regulation of fatty acid oxidation                                              | 2/35 | 0.001563868 | ACADVL/ACACB                   | 2 |
| GO:1903793 | positive regulation of anion transport                                          | 2/35 | 0.001794958 | CYP4F2/CYP4A11                 | 2 |
| GO:0090207 | regulation of triglyceride metabolic process                                    | 2/35 | 0.001916224 | APOC3/APOA1                    | 2 |
| GO:0006639 | acylglycerol metabolic process                                                  | 3/35 | 0.001917763 | CYP2E1/APOC3/APOA1             | 3 |
| GO:0006638 | neutral lipid metabolic process                                                 | 3/35 | 0.001964544 | CYP2E1/APOC3/APOA1             | 3 |
| GO:0034381 | plasma lipoprotein particle clearance                                           | 2/35 | 0.002041284 | APOC3/APOA1                    | 2 |
| GO:0046942 | carboxylic acid transport                                                       | 4/35 | 0.002098273 | SLCO1B1/CYP4F2/CYP4A11/ACACB   | 4 |
| GO:0019433 | triglyceride catabolic process                                                  | 2/35 | 0.002170123 | APOC3/APOA1                    | 2 |
| GO:0051180 | vitamin transport                                                               | 2/35 | 0.002170123 | GC/APOA1                       | 2 |
| GO:0055090 | acylglycerol homeostasis                                                        | 2/35 | 0.002170123 | APOC3/APOA1                    | 2 |
| GO:0070328 | triglyceride homeostasis                                                        | 2/35 | 0.002170123 | APOC3/APOA1                    | 2 |

|            |                                                   |      |             |                              |   |
|------------|---------------------------------------------------|------|-------------|------------------------------|---|
| GO:0003091 | renal water homeostasis                           | 2/35 | 0.002302724 | CYP4F2/CYP4A11               | 2 |
| GO:0071827 | plasma lipoprotein particle organization          | 2/35 | 0.002302724 | APOC3/APOA1                  | 2 |
| GO:0046890 | regulation of lipid biosynthetic process          | 3/35 | 0.002312042 | ACADVL/APOC3/APOA1           | 3 |
| GO:1902652 | secondary alcohol metabolic process               | 3/35 | 0.002312042 | ACADVL/CYP3A4/APOA1          | 3 |
| GO:0019216 | regulation of lipid metabolic process             | 4/35 | 0.002502704 | ACADVL/APOC3/APOA1/ACACB     | 4 |
| GO:0071825 | protein-lipid complex subunit organization        | 2/35 | 0.002579152 | APOC3/APOA1                  | 2 |
| GO:0009112 | nucleobase metabolic process                      | 2/35 | 0.002722949 | AOX1/ALDH6A1                 | 2 |
| GO:0032371 | regulation of sterol transport                    | 2/35 | 0.002870447 | APOC3/APOA1                  | 2 |
| GO:0032374 | regulation of cholesterol transport               | 2/35 | 0.002870447 | APOC3/APOA1                  | 2 |
| GO:0046461 | neutral lipid catabolic process                   | 2/35 | 0.003021631 | APOC3/APOA1                  | 2 |
| GO:0046464 | acylglycerol catabolic process                    | 2/35 | 0.003021631 | APOC3/APOA1                  | 2 |
| GO:0046686 | response to cadmium ion                           | 2/35 | 0.003021631 | CYP1A2/CYB5A                 | 2 |
| GO:0033344 | cholesterol efflux                                | 2/35 | 0.003334995 | APOC3/APOA1                  | 2 |
| GO:0008206 | bile acid metabolic process                       | 2/35 | 0.003662921 | SLCO1B1/ACOX2                | 2 |
| GO:0032309 | icosanoid secretion                               | 2/35 | 0.003662921 | CYP4F2/CYP4A11               | 2 |
| GO:0042743 | hydrogen peroxide metabolic process               | 2/35 | 0.003662921 | CYP1A1/CYP1A2                | 2 |
| GO:0034308 | primary alcohol metabolic process                 | 2/35 | 0.003832307 | ALDH2/TTR                    | 2 |
| GO:0006694 | steroid biosynthetic process                      | 3/35 | 0.0038549   | ACOX2/CYP3A4/APOA1           | 3 |
| GO:0051055 | negative regulation of lipid biosynthetic process | 2/35 | 0.004005288 | ACADVL/APOC3                 | 2 |
| GO:0071715 | icosanoid transport                               | 2/35 | 0.004181849 | CYP4F2/CYP4A11               | 2 |
| GO:0015711 | organic anion transport                           | 4/35 | 0.004219629 | SLCO1B1/CYP4F2/CYP4A11/ACACB | 4 |
| GO:0006879 | cellular iron ion homeostasis                     | 2/35 | 0.004545653 | HPX/CP                       | 2 |
| GO:0055078 | sodium ion homeostasis                            | 2/35 | 0.004545653 | CYP4F2/CYP4A11               | 2 |

|            |                                                  |      |             |                               |   |
|------------|--------------------------------------------------|------|-------------|-------------------------------|---|
| GO:0048871 | multicellular organismal homeostasis             | 4/35 | 0.004659594 | ACADVL/CYP4F2 /CYP4A11/ACAC B | 4 |
| GO:0032370 | positive regulation of lipid transport           | 2/35 | 0.004732866 | CYP4F2/CYP4A11                | 2 |
| GO:0046503 | glycerolipid catabolic process                   | 2/35 | 0.004732866 | APOC3/APOA1                   | 2 |
| GO:0097006 | regulation of plasma lipoprotein particle levels | 2/35 | 0.006141117 | APOC3/APOA1                   | 2 |
| GO:0050891 | multicellular organismal water homeostasis       | 2/35 | 0.00657446  | CYP4F2/CYP4A11                | 2 |
| GO:0015914 | phospholipid transport                           | 2/35 | 0.007249862 | APOC3/APOA1                   | 2 |
| GO:0019915 | lipid storage                                    | 2/35 | 0.007955385 | APOA1/ACACB                   | 2 |
| GO:0015850 | organic hydroxy compound transport               | 3/35 | 0.008053573 | SLCO1B1/APOC3/APOA1           | 3 |
| GO:0043270 | positive regulation of ion transport             | 3/35 | 0.008858799 | CYP4F2/CYP4A11 /DMD           | 3 |
| GO:0046700 | heterocycle catabolic process                    | 4/35 | 0.009177063 | CYP1A1/AOX1/K MO/ALDH6A1      | 4 |
| GO:0030104 | water homeostasis                                | 2/35 | 0.009197156 | CYP4F2/CYP4A11                | 2 |
| GO:0042632 | cholesterol homeostasis                          | 2/35 | 0.009197156 | APOC3/APOA1                   | 2 |
| GO:0055092 | sterol homeostasis                               | 2/35 | 0.009197156 | APOC3/APOA1                   | 2 |
| GO:0055072 | iron ion homeostasis                             | 2/35 | 0.009716601 | HPX/CP                        | 2 |
| GO:0030301 | cholesterol transport                            | 2/35 | 0.010248872 | APOC3/APOA1                   | 2 |
| GO:0015918 | sterol transport                                 | 2/35 | 0.010519783 | APOC3/APOA1                   | 2 |

GO\_BP\_cluster3

| ID         | Description                   | BgRatio  | pvalue   | geneID                              | Count |
|------------|-------------------------------|----------|----------|-------------------------------------|-------|
| GO:0071294 | cellular response to zinc ion | 18/16672 | 4.49E-22 | MT1F/MT1M/MT1 G/MT1X/MT1E/MT1H/MT2A | 7     |
| GO:0010043 | response to zinc ion          | 52/16672 | 1.89E-18 | MT1F/MT1M/MT1 G/MT1X/MT1E/MT1H/MT2A | 7     |

|            |                                           |           |             |                                            |   |
|------------|-------------------------------------------|-----------|-------------|--------------------------------------------|---|
| GO:1990267 | response to transition metal nanoparticle | 124/16672 | 1.06E-15    | MT1F/MT1M/MT1<br>G/MT1X/MT1E/M<br>T1H/MT2A | 7 |
| GO:0071248 | cellular response to metal ion            | 129/16672 | 1.41E-15    | MT1F/MT1M/MT1<br>G/MT1X/MT1E/M<br>T1H/MT2A | 7 |
| GO:0071241 | cellular response to inorganic substance  | 149/16672 | 3.95E-15    | MT1F/MT1M/MT1<br>G/MT1X/MT1E/M<br>T1H/MT2A | 7 |
| GO:0071276 | cellular response to cadmium ion          | 15/16672  | 5.87E-15    | MT1F/MT1G/MT1<br>X/MT1E/MT1H               | 5 |
| GO:0045926 | negative regulation of growth             | 226/16672 | 7.67E-14    | MT1F/MT1M/MT1<br>G/MT1X/MT1E/M<br>T1H/MT2A | 7 |
| GO:0010038 | response to metal ion                     | 297/16672 | 5.31E-13    | MT1F/MT1M/MT1<br>G/MT1X/MT1E/M<br>T1H/MT2A | 7 |
| GO:0046686 | response to cadmium ion                   | 39/16672  | 1.12E-12    | MT1F/MT1G/MT1<br>X/MT1E/MT1H               | 5 |
| GO:0010035 | response to inorganic substance           | 455/16672 | 1.08E-11    | MT1F/MT1M/MT1<br>G/MT1X/MT1E/M<br>T1H/MT2A | 7 |
| GO:0046688 | response to copper ion                    | 21/16672  | 3.16E-05    | MT1G/MT1X                                  | 2 |
| GO:0046916 | cellular transition metal ion homeostasis | 85/16672  | 0.000530583 | MT1X/MT2A                                  | 2 |
| GO:0055076 | transition metal ion homeostasis          | 113/16672 | 0.000935224 | MT1X/MT2A                                  | 2 |

Table S6. Univariate cox analyses and Kaplan-Meier survival analysis of the Cluster 1 gene (N=212)

| gene symbol | Univariate Analysis |         | KM survival     |
|-------------|---------------------|---------|-----------------|
|             | HR (95% CI)         | p value | log-rank test P |
| FGB         | 0.96(0.787-1.172)   | 0.689   | 0.5729          |
| F2          | 0.954(0.79-1.153)   | 0.626   | 0.0546          |
| ECM1        | 0.897(0.629-1.28)   | 0.55    | 0.1642          |
| ALB         | 0.928(0.746-1.154)  | 0.5     | 0.0522          |
| PROS1       | 0.901(0.734-1.106)  | 0.318   | 0.0893          |
| ACADSB      | 0.897(0.743-1.082)  | 0.256   | 0.2355          |
| ITIH4       | 0.905(0.767-1.067)  | 0.235   | 0.1741          |
| ACSL5       | 0.911(0.786-1.056)  | 0.218   | 0.4363          |

|                                                                                                                                              |                    |                        |                        |
|----------------------------------------------------------------------------------------------------------------------------------------------|--------------------|------------------------|------------------------|
| ACADL                                                                                                                                        | 0.849(0.666-1.081) | 0.184                  | 0.0784                 |
| FGA                                                                                                                                          | 0.89(0.757-1.047)  | 0.16                   | 0.5018                 |
| ACADS                                                                                                                                        | 0.749(0.515-1.089) | 0.13                   | 0.2192                 |
| ACAA1                                                                                                                                        | 0.825(0.655-1.038) | 0.1                    | 0.0454                 |
| PLG                                                                                                                                          | 0.902(0.799-1.019) | 0.096                  | 0.0605                 |
| IGF1                                                                                                                                         | 0.853(0.708-1.028) | 0.095                  | 0.1137                 |
| SERPINA4                                                                                                                                     | 0.886(0.779-1.009) | 0.068                  | 0.0568                 |
| ACSL1                                                                                                                                        | 0.867(0.744-1.011) | 0.068                  | 0.4589                 |
| SERPINF2                                                                                                                                     | 0.842(0.706-1.004) | 0.055                  | 0.1173                 |
| SERPING1                                                                                                                                     | 0.837(0.71-0.985)  | 0.032 <sup>*</sup>     | 0.0833                 |
| F8                                                                                                                                           | 0.772(0.614-0.97)  | 0.026 <sup>*</sup>     | 0.0238 <sup>*</sup>    |
| ACSM3                                                                                                                                        | 0.751(0.602-0.937) | 0.011 <sup>*</sup>     | 0.0042 <sup>***</sup>  |
| ACAT1                                                                                                                                        | 0.743(0.601-0.917) | 0.006 <sup>**</sup>    | 0.1827                 |
| HRG                                                                                                                                          | 0.867(0.785-0.958) | 0.005 <sup>**</sup>    | 0.0126 <sup>*</sup>    |
| GCDH                                                                                                                                         | 0.71(0.56-0.899)   | 0.0044 <sup>***</sup>  | 0.003 <sup>***</sup>   |
| MUT                                                                                                                                          | 0.686(0.543-0.866) | 0.0015 <sup>***</sup>  | 0.0002 <sup>***</sup>  |
| CRYL1                                                                                                                                        | 0.733(0.614-0.876) | 0.0006 <sup>***</sup>  | 0.0262 <sup>*</sup>    |
| CDC37L1                                                                                                                                      | 0.564(0.417-0.762) | 0.0002 <sup>***</sup>  | 0.0007 <sup>***</sup>  |
| SPP2                                                                                                                                         | 0.826(0.749-0.911) | 0.0001 <sup>***</sup>  | <0.0001 <sup>***</sup> |
| ACADM                                                                                                                                        | 0.599(0.468-0.767) | <0.0001 <sup>***</sup> | 0.0003 <sup>***</sup>  |
| ECHDC2                                                                                                                                       | 0.624(0.495-0.786) | <0.0001 <sup>***</sup> | 0.0006 <sup>***</sup>  |
| HR Hazard ratio, CI confidence interval, <sup>*</sup> Significant P value, <sup>***</sup> P<0.005, <sup>**</sup> P<0.01, <sup>*</sup> P<0.05 |                    |                        |                        |

Table S7. Cox proportional hazards models in discovery cohort and internal testing cohort

| Factor                                                                                          | discovery cohort (N=106) |                       |                       | internal testing cohort (N=106) |                 |                       |
|-------------------------------------------------------------------------------------------------|--------------------------|-----------------------|-----------------------|---------------------------------|-----------------|-----------------------|
|                                                                                                 | Univariate Analysis      |                       | Multivariate Analysis | Univariate Analysis             |                 | Multivariate Analysis |
|                                                                                                 | HR (95% CI)              | p value               | HR (95% CI)           | p value                         | HR (95% CI)     | p value               |
| Sex, male v                                                                                     | 1.13(0.44-2.9)           |                       | 0.8 1.2(0.47-3.08)    | 0.699                           | 2.67(0.82-8.64) | 0.102                 |
| Age                                                                                             | 1.01(0.98-1.04)          |                       | 0.7 1.01(0.98-1.04)   | 0.643                           | 0.98(0.95-1.00) | 0.082                 |
| Risk Score                                                                                      | 2.72(1.84-4.02)          | <0.001 <sup>***</sup> | 2.72(1.84-4.01)       | <0.001 <sup>***</sup>           | 1.51(1.12-2.04) | 0.007 <sup>**</sup>   |
| HR Hazard ratio, CI confidence interval, *Significant P value, *** P<0.005, ** P<0.01, * P<0.05 |                          |                       |                       |                                 |                 |                       |
